# Supplementary material for: Adaptive evolution of multiple-variable exons and structural diversity of drug-metabolizing enzymes
Source: PubMed Central journal article supplement (PMC1885805; doi:10.1186/1471-2148-7-69), 2007-05-02

**A**

|        |      |                              |       |             |
|--------|------|------------------------------|-------|-------------|
| ha1    | -231 | agaat GTGATTTGAGTATGAAATTCC  | agcca | -211 (1.00) |
| ha3    | -314 | gtgac ATGAAATGGGTGTTCCACAGCC | ttgtg | -294 (1.00) |
| ha4    | -314 | gtgac ATGAAATGGGTGTTCCACAGCC | ttgtg | -294 (1.00) |
| ha5    | -313 | gtgac ATGAAATGGGGTTCACAGCC   | ttgtg | -293 (1.00) |
| ca1    | -229 | agaat GTGATTTGAGTATGAAATTCC  | agcca | -209 (1.00) |
| ca2    | -315 | gtgac ATGAAATGGGTTCACAGCC    | ctttg | -295 (1.00) |
| ca3    | -314 | gtgac ATGAAATGGGTGTTCCACAGCC | ttgtg | -294 (1.00) |
| ca4    | -314 | gtgac ATGAAATGGGTGTTCCACAGCC | ttgtg | -294 (1.00) |
| mmaa1  | -225 | agaat GTGATTTAAGTATGAAATTCC  | agcca | -205 (1.00) |
| mmaa2  | -314 | gtgac ATGAAATGGGTGTTCCACAGCC | ttgta | -294 (1.00) |
| mmaa4a | -314 | gtgac ATGAAATGGTGTTCACAGCC   | ttgta | -294 (1.00) |
| mmaa4b | -318 | gtgac ATGAAATGGGTGTTCCACAGCC | ttgtg | -298 (1.00) |
| mmaa5  | -316 | gtgac ATGAAATGGGTGTTCCACAGCC | ttgtg | -296 (1.00) |
| ba1    | -225 | agaat GTGATTTGAGTATGAAATTCC  | agcca | -205 (1.00) |
| ba2    | -314 | gtgac ATGAAATGGGTGTTCCACAGCC | ttgtg | -294 (1.00) |
| ba4    | -318 | gtgac ATGAAATGGGTGTTCCACAGCC | ttgtg | -298 (1.00) |
| ba5a   | -317 | gtgac ATGAAATGGGTGTTCCACAGCC | ttgtg | -297 (1.00) |
| ba5b   | -312 | gtgac ATGAAATGGGTGTTCCACAGCC | ttgtg | -292 (1.00) |
| da1    | -81  | tgagt ATGGATTGGTTCCTTGAACAC  | gaagt | -61 (1.00)  |
| da2    | -322 | atcca GTGAATTGGGCATCCACAGCC  | ctggt | -302 (1.00) |
| da3    | -324 | atcca GTGAATTGGGCATCCACAGCC  | ctggt | -304 (1.00) |
| da4    | -324 | atcca GTGAATTGGGCATCCACAGCC  | ctggt | -304 (1.00) |
| ma1    | -353 | gtggt ATGCTTTGGCACTTTACGGTC  | ctttt | -333 (1.00) |
| ma2    | -446 | gcaga ATGACACTGATATGGAGAGAC  | agaat | -426 (1.00) |
| ma5    | -292 | atgga ATGAAATGGGTGTGCACAGCC  | atagt | -272 (1.00) |
| ra1    | -348 | atcct ATGCCTTGGCACTTTACAGTC  | ccttt | -328 (1.00) |
| ra2    | -281 | tggga AAGAAATGGGTGTTCAGCGCC  | ttatt | -261 (1.00) |
| ra4    | -258 | gcctt ATGAAATGAACTCTGACGGTC  | tctag | -238 (1.00) |
| ra6    | -296 | acagg ATGAAATGGGTGTACACAGCC  | ttggt | -276 (1.00) |
| gga1   | -107 | atcaa AAGCTATGGTGTAGCACAGAT  | tgctg | -87 (1.00)  |
| gga3   | -107 | atcaa AAGCTATGGTATAGCACAGAC  | tgctg | -87 (1.00)  |
| gga5   | -397 | aatc ATTCTAGAAGCTTAAACAGGC   | ctgag | -377 (1.00) |
| gga6   | -87  | ctcag ATTGCTTAAAGTGCAGAGCT   | ggtgc | -67 (1.00)  |
| gga7   | -405 | ctcct GTC AATTGGCACTTAATATTC | tggtt | -385 (1.00) |

**B**

|        |      |                              |       |             |
|--------|------|------------------------------|-------|-------------|
| ha6    | -342 | ttcgg GATAGAGAATTGGCAGGGGGT  | cctca | -322 (1.00) |
| ha7    | -152 | ttatg AGTAAATCATTGGCAGTGAAT  | gtgaa | -132 (1.00) |
| ha8    | -155 | ttatg AGTAAATCATTGGCAGTGAAT  | gtgat | -135 (1.00) |
| ha9    | -150 | ttttg GGTAAATCATTGTCAGTGACT  | gattt | -130 (1.00) |
| ha10   | -154 | ttatg AGTAAATCATTGGCAGTGAAT  | gtgat | -134 (1.00) |
| ca6    | -342 | ttcgg GATAGAGAATTGGCAGGGGGT  | cctca | -322 (1.00) |
| ca7    | -151 | ttatg AGTAAATCATTGGCAGTGAAT  | gtgaa | -131 (1.00) |
| ca8    | -156 | ttatg AGTAAATCATTGGCAGTGAAT  | gtgat | -136 (1.00) |
| ca9    | -149 | ttttg GGTAAATCATTGTCAGTGACT  | gattt | -129 (1.00) |
| ca10   | -154 | ttatg AGTAAATCATTGGCAGTGAAT  | gtgat | -134 (1.00) |
| mmaa6  | -343 | ttcgg GATAGAGAATTGGCAGGGGGT  | ctcca | -323 (1.00) |
| mmaa7  | -155 | ttatg AGTAAATCATTGGCAGTGAAT  | gtgca | -135 (1.00) |
| mmaa8  | -163 | ttagg AGTAAATCATTGGCAGTGAAT  | atgat | -143 (1.00) |
| mmaa9  | -156 | ttttg AGTAAATCATTGTCAGTGACT  | gattt | -136 (1.00) |
| mmaa10 | -143 | ttatg AGTAAATCATTGGCAGTGAAT  | gtgat | -123 (1.00) |
| ba6    | -343 | ttcgg GATAGAGAATTGGCAGGGGGT  | ctcca | -323 (1.00) |
| ba7    | -157 | ttatg AGTAAATCATTGGCAGTGAAT  | gtgca | -137 (1.00) |
| ba8    | -156 | ttagg AGTAAATCATTGGCAGTGAAT  | atgat | -136 (1.00) |
| ba9    | -165 | ttttg AGTAAATCATTGTCAGTGACT  | gattt | -145 (1.00) |
| ba10   | -143 | ttatg AGTAAATCATTGGCAGTGAAT  | gtgat | -123 (1.00) |
| da6    | -211 | gataa GGGACCTCATTGGCTCGAGAT  | ggcta | -191 (1.00) |
| da7    | -164 | ttagg AGGGCATCACTGGCAATGAGT  | gtagt | -144 (1.00) |
| da8    | -161 | ttagg AGTGCATCACTGGCAATGAGT  | gtagt | -141 (1.00) |
| da9    | -161 | ttagg AGTGCATCACTGGCAATGAGT  | gtagt | -141 (1.00) |
| da10   | -162 | ttagg AGGGCATCACTGGCAATGAGT  | gtagt | -142 (1.00) |
| da11   | -164 | ttagg AGGGCATCACTGGCAATAGGT  | gtagt | -144 (1.00) |
| ma7    | -350 | aaagt GTC AATGCATTGACAGAGAGC | cattt | -330 (1.00) |
| ma9    | -348 | aaagt GTCAGTGCATTGACAGAGAGC  | cattt | -328 (1.00) |
| ma10   | -122 | tcctc AGTAAATCATTCTCCTAAACG  | gctgt | -102 (1.00) |
| ma11   | -154 | tcaaa AGTCAGTCATTGTCAGGGAGT  | gtact | -134 (1.00) |
| ma12   | -150 | tttta AGTAAATCATTAACTGAATT   | taacg | -130 (1.00) |
| ma13   | -150 | tcttt TGTGAATAATTAACCTGAATT  | taaca | -130 (1.00) |
| ra7    | -356 | aaagt GTCAGAGCACTGACTGAGGGT  | cattt | -336 (1.00) |
| ra8    | -137 | tccca AGTAAATCATTGCCAGGAACT  | gctat | -117 (1.00) |
| ra9    | -152 | tcaaa AGTCAGTCATTGTCAGGGAGT  | gtact | -132 (1.00) |
| ra11   | -151 | ttttc AGTAAATCATTACCCTGAAT   | ttaac | -131 (1.00) |
| gga4   | -457 | tgctt ATCAATCTCTGTCAATCATT   | acttc | -437 (1.00) |
| gga8   | -92  | gggca AAGGTATCATTAAATGCAGT   | gccaa | -72 (1.00)  |
| gga9   | -412 | ttgaa TGCAACTCTTTGAATGTAAT   | gtcca | -392 (1.00) |
| gga10  | -255 | taggc AGTAAATCATTAACTAGAGAA  | taatc | -235 (1.00) |
| gga11  | -299 | aagcc AGTAAATCATTAACTAGAACA  | taatc | -279 (1.00) |
| gga12  | -305 | aagcc AGTAAATCATTAACTAGAAGA  | taatc | -285 (1.00) |
| gga13  | -287 | agggc AGTAAATCATTAACTAGAAGA  | taatc | -267 (1.00) |
| gga14  | -137 | tgagc AGTAAACATTAACTAGAATA   | taacc | -117 (1.00) |

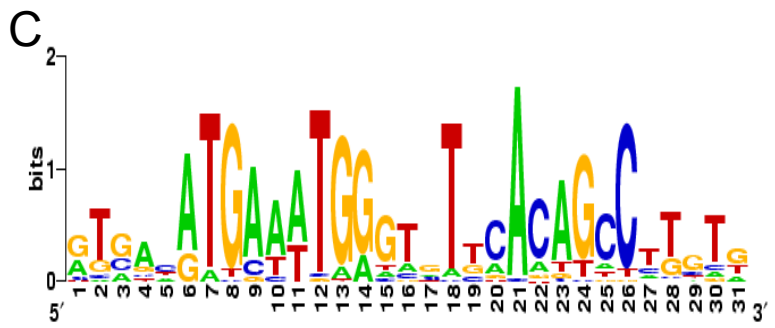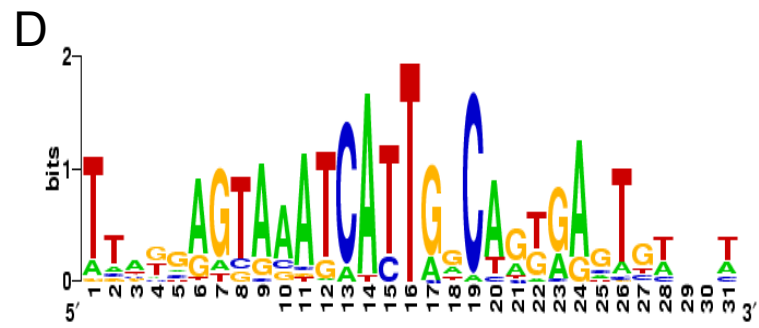

**E**

|      |      |                              |       |             |
|------|------|------------------------------|-------|-------------|
| z1a1 | -53  | acatt ACACTACTGTTAATGTACTTC  | tgctc | -33 (1.00)  |
| z1a2 | -308 | atggc TCCTTGCTGTTAGTTTATTGT  | tcatt | -288 (1.00) |
| z1a3 | -380 | gttta TAAATGCTGTAAGAGCATTGT  | tagta | -360 (1.00) |
| z1a4 | -351 | ttaaa TAAAGTCCCTAAATTAATGT   | catgc | -331 (1.00) |
| z1a5 | -378 | acatt TCATTGCAGTAGATGAATTC   | attaa | -358 (1.00) |
| z1a6 | -357 | gctct GTTTGTCTCATAATTCATTGT  | ctgca | -337 (1.00) |
| z1a7 | -168 | cagag ATTATTCTTTGATGCCCTGC   | cttct | -148 (1.00) |
| z1b1 | -310 | ttttg GCATTTGTGTTAATGCATTC   | attaa | -290 (1.00) |
| z1b2 | -106 | gcctt TTCTATCTGATAGTGAATGT   | aaaag | -86 (1.00)  |
| z1b3 | -110 | gtgga TTTTGTCTGATAGTGAATTC   | gaaag | -90 (1.00)  |
| z1b4 | -110 | ctgga TTTTGTCTGATAGTGAATTC   | gaaag | -90 (1.00)  |
| z1b5 | -111 | cgggg TTTTGTCTGATAATGAATTC   | gaaag | -91 (1.00)  |
| z1b7 | -368 | tacac TTTCGTCACCTTGATTATCTGC | atttt | -348 (1.00) |

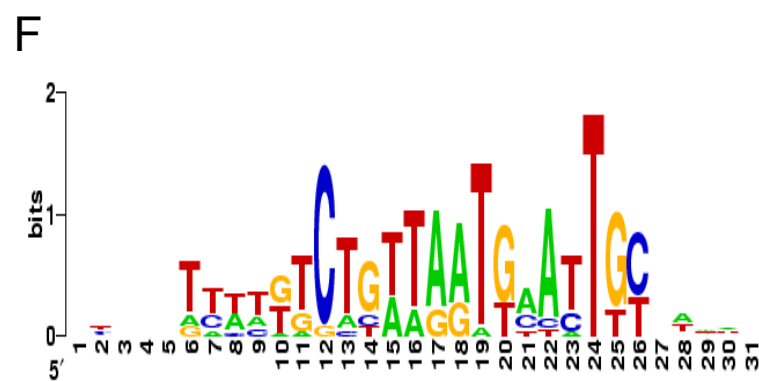

Supplement: 1471-2148-7-69-S5.pdf [file 1471-2148-7-69-S5.pdf]
