# Supplementary material for: Adaptive evolution of multiple-variable exons and structural diversity of drug-metabolizing enzymes
Source: PubMed Central journal article supplement (PMC1885805; doi:10.1186/1471-2148-7-69), 2007-05-02
Supplement: 1471-2148-7-69-S4.pdf [file 1471-2148-7-69-S4.pdf]

MMs 1 EFEAYVNASGEHGIVVFSLGSMVSEIPEKKAMEIAEALGRIPQTVLWRYTGTRPSNLAKN  
 RN 1 EFEAYVNASGEHGIVVFSLGSMVSEIPEKKAMEIAEALGRIPQTVLWRYTGTRPSNLAKN  
 MMa 1 EFEAYVNASGEHGIVVFSLGSMVAE IPEKKAMA IADALGKIPQTVLWRYTGTPPSNLANN  
 PA 1 EFEAYVNASGEHGIVVFSLGSMVAE IPEKKAMA IADALGKIPQTVLWRYTGTPPSNLANN  
 HS 1 EFEAYVNASGEHGIVVFSLGSMVSEIPEKKAMA IADALGKIPQTVLWRYTGTRPSNLANN  
 PT 1 EFEAYVNASGEHGIVVFSLGSMVSEIPEKKAMA IADALGKIPQTVLWRYTGTRPSNLANN  
 CF 1 EFEAYVNASGEHGIVVFSLGSMVSD IPEKKAME IADALGKIPQTVLWRYTGTPPNLSKN  
 BT 1 EFEAYVNASGEHGIVVFSLGSMVSEIPEKAME IADALGKIPQTVLWRYTGTPPNLAKN  
 MD 1 EFEAYVNASGEHGIVVFSLGSMVSEIPMAKAMEIAEALGTIPQTVLWRYTGKPPSNLAKN  
 GG 1 EFEAYVNASGEHGIVVFSLGSMVSEIPMKKAMEIADALGSPQTVLWRYTGEVPPNLPKN  
 XT 1 EFEKLVNNSGEGHGVVFSLGSMVSEIPMNKAMDIAEALKSIPQKVFWRYTGKAPPNLGEN  
 DR1a 1 EEEFVNGSGEGHGVVFTLGSMVSLPEAKAREFFFAFRQIPQVRLWRYTGVPVENAPKN  
 DR1b 1 EEEFVNGSGEGHGVVFSLGSIVSSMPKEKADIFFKAFSMIPQVRLWRYTGEIPNNVPE

MMs 61 TILVKWLPQNDLLGHPKTRAFITHSGSHGIYEGICNGVPMVMMPFLFGDQMDNAKRMETRG  
 RN 61 TILVKWLPQNDLLGHPKARAFITHSGSHGIYEGICNGVPMVMMPFLFGDQMDNAKRMETRG  
 MMa 61 TILVKWLPQNDLLGHPMTRAFITHAGSHGIYEGICNGVPMVMMPFLFGDQMDNAKRMETKG  
 PA 61 TILVKWLPQNDLLGHPMTRAFITHAGSHGIYEGICNGVPMVMMPFLFGDQMDNAKRMETKG  
 HS 61 TILVKWLPQNDLLGHPMTRAFITHAGSHGVYESICNGVPMVMMPFLFGDQMDNAKRMETKG  
 PT 61 TILVKWLPQNDLLGHPMTRAFITHAGSHGVYESICNGVPMVMMPFLFGDQMDNAKRMETKG  
 CF 61 TILVKWLPQNDLLGHPKARAFITHSGSHGIYEGICNGVPMVMLPLFGDQMDNAKRMETRG  
 BT 61 TKLVKWLPQNDLLGHPKTRAFITHSGSHGIYEGICNGVPMVMMPFLFGDQMDNAKRMETRG  
 MD 61 TKLVKWLPQNDLLAHPKARAFITHAGSHGIYEGICNGVPMVLMPLFGDQMDNAKRMESRG  
 GG 61 VKLVKWLPQNDLLAHPKTRAFITHGSHGVYESICNAVPMVLMPLFGDQMDNAKRVESRG  
 XT 61 THLVKWLPQNDLLAHPKARAFITHAGSHGIYEGICNAVPMVMMPFLFGDQMDNAKRIESRG  
 DR1a 61 VKLVKWLPQNDLLGHPKTRAFITHGSHGIYEGICNGVPMVMLPLFGDQMDNAQRIVSRG  
 DR1b 61 VKLVKWLPQNDLLGHPKARAFITHGGTHGIYEGICHGVPMVMLPLFGDQADNVHRVATRG

MMs 121 AGVTLNVLEMTADDLENALKTVINNKSYKENIMRLSSLHKDRPIEPLDLAVFVWEYVMRH  
 RN 121 AGVTLNVLEMTADDLENALKTVINNKSYKENIMRLSSLHKDRPIEPLDLAVFVWEYVMRH  
 MMa 121 AGVTLNVLEMTSEDLENALKAVINDKSYKENIMHLSLHKDRPVEPLDLAVFVWEFVMRH  
 PA 121 AGVTLNVLEMTSEDLENALKAVINDKSYKENIMHLSLHKDRPVEPLDLAVFVWEFVMRH  
 HS 121 AGVTLNVLEMTSEDLENALKAVINDKSYKENIMRLSSLHKDRPVEPLDLAVFVWEFVMRH  
 PT 121 AGVTLNVLEMTSEDLENALKAVINDKSYKENIMRLSSLHKDRPVEPLDLAVFVWEFVMRH  
 CF 121 AGVTLNVLEMTSADLANALKAVINDKSYKENIMHLSRLHKDRPIEPLDLAVFVWEFVMRH  
 BT 121 AGVTLNVLEMTSEDLKALKAVINEKTYKENIMRLSRLHKDRPIEPLDLAVFVWEFVMRH  
 MD 121 AGVTLNVLDMTSSDLSKALKTVINDKSYKENIMRLSALHKDRPIDPLNLAVFVWEFVMRH  
 GG 121 AGLTLNILEMTSKDLSALKAVINDKSYKENIQRLSDLHLDRPIHPLDLAVHWVEFVMRH  
 XT 121 AGLTLNVLHMTPEDLNAVRVINNPVYKENIQRMSSLHLDRPIHPLDLAVHWVEFVMRH  
 DR1a 121 VAEELTYDYDTSEKLLVALKVINDKSYKEMMKLSAHRDRPIEPLDLAVFVWEFVMRH  
 DR1b 121 VGVILSHDITVETLLDALNSVINNSYKQKMKLSAHRDRPIQPLDLAVFWTEFVMRH

MMs 181 KGAPHLRPAAHDLTWYQYHSLDVIGFLLAIVLTVVFIKCCAYGCRKCFGKGRVKKSHKSKTH  
 RN 181 KGAPHLRPAAHDLTWYQYHSLDVIGFLLAIVLTVVFIKCCAYGCRKCFGKGRVKKSHKSKTH  
 MMa 181 KGAPHLRPAAHDLTWYQYHSLDVIGFLLAIVLTVAFIAFKCCAYGYRCKCFGKGRVKKAHKSKTH  
 PA 181 KGAPHLRPAAHDLTWYQYHSLDVIGFLLAIVLTVAFIAFKCCAYGYRCKCFGKGRVKKAHKSKTH  
 HS 181 KGAPHLRPAAHDLTWYQYHSLDVIGFLLAIVLTVAFITFKCCAYGYRCKCFGKGRVKKAHKSKTH  
 PT 181 KGAPHLRPAAHDLTWYQYHSLDVIGFLLAIVLTVAFITFKCCAYGYRCKCFGKGRVKKAHKSKTH  
 CF 181 KGAPHLRPAAHDLTWYQYHSLDVIGFLLAVLGVVFIYKCCAFGCRKCFGKGRVKKPHKSKAH  
 BT 181 KGASHLRPAAHDLTWYQYHSLDVIGFLLAVLTVVFIKACAFKCFGKGRVKKSHKSKTH  
 MD 181 KGAPHLRPAAHDLNWIQYHSLDVIAFLLAIVLTVVLIIVKSCFKCFRCKCFGKGRVKKSTKPKSH  
 GG 181 KGAPHLRPAAHDLNWIQYHSLDVIAFLLAVLTVLISVSKCCMFCRRCCFKKGRKSKSGKSKTH  
 XT 181 KGAPHLRPAAHDLNWIQYHSLDVIGFLLAVLTVLISVSKCCMFCRRCCFKKGRKSKSGKSKTH  
 DR1a 181 KGAPHLRPAAHDLNWIQYHSLDVIGFLLIILTVIFVTVKSCMFCFRKCFKSKKSKKKA~~~~~  
 DR1b 181 KGAPHLRPAAHDLNWIQYHSLDVIGFLLIILTVIFVTVKSCMFCFRKCFKSKKSKKKA~~~~~

Transmembrane segment
