# Supplementary material for: Adaptive evolution of multiple-variable exons and structural diversity of drug-metabolizing enzymes
Source: PubMed Central journal article supplement (PMC1885805; doi:10.1186/1471-2148-7-69), 2007-05-02
Supplement: 1471-2148-7-69-S6.pdf [file 1471-2148-7-69-S6.pdf]

**Additional file 6. Gene conversion events in vertebrate multiple-variable-exon gene clusters**

| Species       | Number of <i>Ugt1</i> sequences | Number of gene conversion events | Sequence name   | Begin | End | Length | BC KA P-value |
|---------------|---------------------------------|----------------------------------|-----------------|-------|-----|--------|---------------|
| human         | 9                               | 1                                | Ugt1a8;Ugt1a9   | 519   | 656 | 138    | 0.13491       |
| chimpanzee    | 9                               | 0                                |                 |       |     |        |               |
| rhesus monkey | 10                              | 2                                | Ugt1a7;Ugt1a8   | 130   | 256 | 127    | 0.10182       |
|               |                                 |                                  | Ugt1a8;Ugt1a9   | 515   | 621 | 107    | 0.11193       |
| baboon        | 10                              | 0                                |                 |       |     |        |               |
| dog           | 10                              | 11                               | Ugt1a8;Ugt1a9   | 1     | 236 | 236    | 0.00001       |
|               |                                 |                                  | Ugt1a7;Ugt1a8   | 22    | 494 | 473    | 0.00003       |
|               |                                 |                                  | Ugt1a11;Ugt1a8  | 1     | 265 | 265    | 0.00006       |
|               |                                 |                                  | Ugt1a10;Ugt1a7  | 22    | 282 | 261    | 0.00019       |
|               |                                 |                                  | Ugt1a7;Ugt1a9   | 22    | 236 | 215    | 0.00103       |
|               |                                 |                                  | Ugt1a11;Ugt1a7  | 22    | 265 | 244    | 0.00133       |
|               |                                 |                                  | Ugt1a10;Ugt1a11 | 1     | 265 | 265    | 0.00165       |
|               |                                 |                                  | Ugt1a10;Ugt1a9  | 1     | 236 | 236    | 0.00278       |
|               |                                 |                                  | Ugt1a10;Ugt1a8  | 350   | 677 | 328    | 0.05561       |
| mouse         | 9                               | 0                                | Ugt1a11;Ugt1a8  | 350   | 488 | 139    | 0.14857       |
|               |                                 |                                  | Ugt1a10;Ugt1a7  | 350   | 494 | 145    | 0.19117       |
|               |                                 |                                  | Ugt1a4;Ugt1a6   | 54    | 245 | 192    | < 0.00001     |
|               |                                 |                                  | Ugt1a11;Ugt1a12 | 53    | 276 | 224    | < 0.00001     |
| rat           | 8                               | 1                                | Ugt1a1;Ugt1a3   | 1     | 110 | 110    | 0.05196       |
|               |                                 |                                  | Ugt1a10;Ugt1a14 | 53    | 257 | 205    | 0.07249       |
| chicken       | 13                              | 3                                |                 |       |     |        |               |
| zebrafish1a   | 7                               | 0                                |                 |       |     |        |               |
| zebrafish1b   | 6                               | 0                                |                 |       |     |        |               |

| Species       | Number of <i>Gcnt2</i> sequences | Number of gene conversion events | Sequence name | Begin | End | Length | BC KA P-value |
|---------------|----------------------------------|----------------------------------|---------------|-------|-----|--------|---------------|
| human         | 3                                | 0                                |               |       |     |        |               |
| chimpanzee    | 3                                | 0                                |               |       |     |        |               |
| rhesus monkey | 3                                | 0                                |               |       |     |        |               |
| dog           | 3                                | 0                                |               |       |     |        |               |
| mouse         | 3                                | 0                                |               |       |     |        |               |
| rat           | 3                                | 1                                | Gcnt2a;Gcnt2c | 454   | 595 | 142    | < 0.00001     |
| opossum       | 2                                | 0                                |               |       |     |        |               |
| chicken       | 2                                | 0                                |               |       |     |        |               |
| frog          | 2                                | 0                                |               |       |     |        |               |
| zebrafish     | 1                                | 0                                |               |       |     |        |               |

| Species   | Number of <i>Ugt2</i> sequences | Number of gene conversion events | Sequence name   | Begin | End  | Length | BC KA P-value |
|-----------|---------------------------------|----------------------------------|-----------------|-------|------|--------|---------------|
| human     | 10                              | 0                                |                 |       |      |        |               |
| mouse     | 10                              | 0                                |                 |       |      |        |               |
| rat       | 11                              | 2                                | Ugt2b34;Ugt2b39 | 879   | 1127 | 249    | 0.00006       |
|           |                                 |                                  | Ugt2b34;Ugt2b39 | 396   | 564  | 169    | 0.0047        |
| zebrafish | 4                               | 1                                | Ugt2a3;Ugt2a4   | 14    | 117  | 104    | < 0.00001     |

**BC KA P-value:** Bonferroni-corrected Karlin-Altschul P value.

Only lengths > 95 nt are shown.
