# Supplementary material for: Adaptive evolution of multiple-variable exons and structural diversity of drug-metabolizing enzymes
Source: PubMed Central journal article supplement (PMC1885805; doi:10.1186/1471-2148-7-69), 2007-05-02
Supplement: 1471-2148-7-69-S7.pdf [file 1471-2148-7-69-S7.pdf]

GGA 1 ~~~~MSVLYCFFAFLILSLSPFFVYAINHAQ...KSLRRRKFSVSTLL..E.DCK  
GGB 1 ~~~~MRRRRAVTLTVAVLLGAAMLLRRHG...GSGAGLGGSAESMAL..ERACG  
XTA 1 ~~~~MIYPKQLFFIFLALGVVILNLSLSQ.....SQIKKALVFSQQLSL..LEEACQ  
XTB 1 ~~~~MPSWVRFIFPVPVLSVTVLTYNNLSLKL...AGLHRYNTTEEKIQ..FAETCE  
MMsC 1 ~~~~MSLRLGKVFAVSALSVVIFVVFYHSQSLP...NLVQQLNSSSER..T.SVTICD  
RNC 1 ~~~~MNL.CMKFFAFTALSVVIFVVFYHSQSLP...NLVQRFNSSSER..T.SVIA CD  
PTC 1 ~~~~MNFWRVYCFFAFTLLSVVIFVVFYSSQSLSP...KSMKELNSSSERY.F.RKTACN  
HSC 1 ~~~~MNFWRVYCFFAFTLLSVVIFVVFYSSQSLSP...KSMKELNSSSERY.F.RKTACN  
MMaC 1 ~~~~MNFWRVYCFFAFTLLSVVIFVVFYSSQSLSP...KSMKELNSSSERY.F.RKTACN  
CFC 1 ~~~~MNFWRCCFFAFTALLSAILLMLVYHSQHLPL...RSLGKPSGPGPRH.V.RLRACE  
MDB 1 ~~~~MNFGRYYRFVTPLLSLVLFVFLYNHHTYDS...KSYHRFNVSNERYS.L.LYESCN  
MMsA 1 ~~~~MGSWKYSLFSLSLIAALMLFMYDRKLWKN...YHFPRA.VSNISV.L.A.EVCL  
RNA 1 ~~~~MGSWKYSLFSLSLIAALTFMFISSNKLWEN...NHFPRAP.NSSV.L.A.EVCF  
PTA 1 ~~~~MGSWKHCLFSVSLISALIFVFNTELWEN...KRELRAALSNASL.L.A.EACH  
HSA 1 ~~~~MGSWKHCLFSASLISALIFVFNTELWEN...KRELRAALSNASL.L.A.EACH  
MMaA 1 ~~~~MGSWKHCLFSVSLISALIFVFNTELWEN...KRELRAALSNASL.L.A.EACH  
CFA 1 ~~~~MMSVSKHYLFTVSLITAVLVFVFNHKLWEE...KHELRAASNASV.L.T.EVCQ  
PTB 1 ~~~~MPLSMRYLFIILSVSVVIFVVFVFNFGGD...PSFQRLNISDPML.L.T.QVCT  
HSB 1 ~~~~MPLSMRYLFIILSVSVVIFVVFVFNFGGD...PSFQRLNISDPML.L.T.QVCT  
MMaB 1 ~~~~MPLSMRYLFIILSVSVVIFVVFVFNFGGD...PSFQRLNISDPML.L.T.QVCT  
MMsB 1 ~~~~MPSVRYFFIIVSVTVIVFVIVLVLSFGGD...QSYQKLNISDSVM.L.A.QVCS  
RNB 1 ~~~~MPPSMRHFFIIVSVTVIVFVIVLVLSFGGD...QSYQKLNISDSAM.L.A.QVCT  
CFB 1 ~~~~MPSSTRYLFIASVSCVVFVIVCYMLGPGGE...QSFQKLNHSEALM.L.T.QVCT  
MDA 1 ~~~~MPSMLRYLFIIVFIVVFVIVVYMFNIYS...QSLPRLNITNTLV.L.A.KVCN  
DR 1 MVQLENTKCSFLFCIGICTLICSALYLKAKVASDPLPINDLTTLSFTPPPPCPPSNTCD

Transmembrane segment

GGA 50 ALTEKIVSFLKE...NALKITSFG.KFNCTEYITONHYITRVLSAEEAAFPLAYIITMHK  
GGB 48 MLIACQAPTLRD...GGLRPAPR.DSSCKYVSHSRVITRVLSAEEAAFPLAYIITMHK  
XTA 48 ALAKIKVFLWPN...HLPKTYSH.SSNCKDFILKNNYITLPLSEEEAAFPLAYIITVHK  
XTB 51 SFINCKQKSFWE...STLTLTAFE.KSSCPEYVRONHFTMSPLSDEEAAFPLAYIITVHK  
MMsC 49 YGLQNHFTFTTG...DTSHPLE.RLSCPOYRTO SHYITSPLEEEAAFPLAYIMVIHK  
RNC 49 YGLQNHFTVFPVPG...ITSPHLE.KLSCSOYQILSHYITSPLEEEADFPLAYIMVIHK  
PTC 51 HALEKMPVFLWE...NILPSPLR.SVPCDYLTONHYITSPLEEEAAFPLAYIMVIHK  
HSC 51 HALEKMPVFLWE...NILPSPLR.SVPCDYLTONHYITSPLEEEAAFPLAYIMVIHK  
MMaC 51 HALEKMPVFLWE...NILPSPLR.SVPCDYLTONHYITSPLEEEAAFPLAYIMVIHK  
CFC 51 VALEKAAFTWA...NTLPSVPG.SVPCDYLTOSHYITSPLEEEAAFPLAYIMVIHK  
MDB 51 AVEGRPVFLWE...KVLVPSFG.RVSCBOYLQSHYITAPLSKEEAFPLAYIMVVIHK  
MMsA 49 QMFSESFYAD...SARKITLLE.NFTCPEYKIONHYITETLSEEEAFPLAFITTIHK  
RNA 49 QMFSESFYAVD...STRKITLLE.KFTCSEYRVONHYITETLSEEEAFPLAFITTIHK  
PTA 51 QIFEKGVFPTE...NALKITLD.EATCYEYVMSHYITETLSEEEAFPLAYIMVIHK  
HSA 51 QIFEKGVFPTE...NALKITLD.EATCYEYVMSHYITETLSEEEAFPLAYIMVIHK  
MMaA 51 QIFEKGVFPTE...NALKITLD.EATCYEYVMSHYITETLSEEEAFPLAYIMVIHK  
CFA 51 QIFKGRVFPTE...NALKITLS.DSTCYEYMAQSHYITOTLSEEEAFPLAYIMVIHK  
PTB 50 SFINGKTRFLWK...NKLMIH.E.KSSCKEYLTOSHYITAPLSKEEADFPLAYIMVIHK  
HSB 50 SFINGKTRFLWK...NKLMIH.E.KSSCKEYLTOSHYITAPLSKEEADFPLAYIMVIHK  
MMaB 50 SFINGKTRFLWK...NKLMIH.E.KSSCKEYLTOSHYITAPLSKEEADFPLAYIMVIHK  
MMsB 50 SFIDKSRFLWR...NKLMIH.E.KPSCTEYVTO SHYITAPLSOEEVDFPLAYIMVIHK  
RNB 50 SFTNGKNSFLWR...NKLMIH.E.KPSCTEYVTO SHYITAPLSOEEVDFPLAYIMVIHK  
CFB 50 SFIKGRVFPWR...NKLMIH.Q.RTSCRDYLTOSHYITAPLSKEEADFPLAYIMVIHK  
MDA 50 SFIKGRVFPLE...NTLTVS.G.K.SCKEYLTOSHYITAPLSKEEADFPLAYIMVIHK  
DR 61 ILPPATPGFKWQRKDCEKISYHIQPDNTCDLLSOLHFITAPLSKEEEDVPLAFIITTIHK

GGA 105 EFETFERLFRAIYMPQNVYCHVDCKAPAALKQAVRRLVDCFPNAFLASRTERVVYGGVS  
GGB 103 EFETFERLFRAIYMPQNVYCHVDCKAPAALKQAVRRLVDCFPNAFLASRTERVVYGGVS  
XTA 103 EFETFERLFRAIYMPQNIYCVHVDEKASADFMQAVDSLVCQFPNIFLASKMEPVVYGGIS  
XTB 106 EFETFERLFRAIYMPQNIYCVHVDEKASADFMQAVDSLVCQFPNIFLASKMEPVVYGGIS  
MMsC 104 DFDTFERLFRAIYMPQNVYCVHVDKATDTFKEAVRQLLSCFPNAFLASKVEQVYGGFS  
RNC 104 DFDTFERLFRAIYMPQNVYCVHVDKAAETFKEAVRHLLSCFPNAFLASRMERVVYGGFS  
PTC 106 DFDTFERLFRAIYMPQNVYCVHVDEKAPAEYKESVRQLLSCFQNAFLASKTESVYAGIS  
HSC 106 DFDTFERLFRAIYMPQNVYCVHVDEKAPAEYKESVRQLLSCFQNAFLASKTESVYAGIS  
MMaC 106 DFDTFERLFRAIYMPQNAIYCVHVDEKAPAEFKESVRQLLSCFQNAFLASKTESVYAGIS  
CFC 106 NFETFERLFRAIYMPQNVYCVHVDEKAAAFKESVRQLLSCFPNAFLASRMERVVYGGIS  
MDB 106 DFDTFERLFRAIYMPQNVYCHMDEKATTEFKDAVEWLVSFCFNSVFLASKMEPVVYGGIS  
MMsA 104 DYDTFERLFRAIYMPQNVYCVHVDKATDTFKEAVRQLLSCFPNAFLASRMERVVYGGFS  
RNA 104 DYDTFERLFRAIYMPQNVYCVHVDKAAETFKEAVRQLLSCFPNAFLASRMERVVYGGFS  
PTA 106 DFGTFERLFRAIYMPQNVYCVHLDKATDAFKGAVKQLLSCFPNAFLASKKESVYGGIS  
HSA 106 DFGTFERLFRAIYMPQNVYCVHLDKATDAFKGAVKQLLSCFPNAFLASKKESVYGGIS  
MMaA 106 DFGTFERLFRAIYMPQNVYCVHLDKATDAFKGAVKQLLSCFPNAFLASKKESVYGGIS  
CFA 106 DFDTFERLFRAIYMPQNVYCVHVDEKATDTFKNAVKQLLSCFPNAFLASKMEPVVYGGIS  
PTB 104 HFDTFARLFRAIYMPQNIYCVHVDEKATTEFKDAVEQLLSCFPNAFLASKMEPVVYGGIS  
HSB 104 HFDTFARLFRAIYMPQNIYCVHVDEKATTEFKDAVEQLLSCFPNAFLASKMEPVVYGGIS  
MMaB 104 HFDTFARLFRAIYMPQNIYCHVDEKATTEFKDAVEQLLSCFPNAFLASKMEPVVYGGIS  
MMsB 104 NFDTFARLFRAIYMPQNIYCVHVDEKATTEFKDAVEQLVSCFPNAFLASKMEPVVYGGIS  
RNB 104 NFDTFARLFRAIYMPQNVYCVHVDEKATTEFKDAVEQLVSCFPNAFLASKTEPVVYGGIS  
CFB 104 HFDTFARLFRAIYMPQNVYCVHVDEKATTEFKDAVEQLLSCFPNAFLASRMERVVYGGIS  
MDA 103 DFGTFERLFRAIYMPQNVYCVHVDEKATTEFKDAVGRVLSFCFPNAFLASKMEPVVYGGIS  
DR 121 ELATFVRLFRAIYMPQNVYCHVDKASEYKESVVRNLSRQFPNVFLSSVNVKVIYAGFS

GGA 165 RLRADLHCMRDLLASAVPWYLLNACGQDFPLKTNWEIQHLKA..YRGNITPGVLP  
GGB 163 RLRADLHCMRDLLASAVPWYLLNACGQDFPLKTNWEIQRLKA..YRGNITPGVLP  
XTA 163 RLQADLNCMKDLLASDVQWKYVINLCCGQDFPLKTNREIHHIKS..FKGKNITPGVLP  
XTB 166 RLQADLNCMKDLLASDVQWKYVINLCCGQDFPLKTNKEIHHIKS..FKGKNITPGVLP  
MmSC 164 RLQADLNCMKDLVASKVPWKYVINLTCGQDFPLKTNKEILNHLKR..FKGKNITPGVLP  
RNC 164 RLQADLNCMRDLVASKVPWKYVINLTCGQDFPLKTNKEIVQYLKG..FKGKNITPGVLP  
PTC 166 RLQADLNCMKDLVSEVPWKYVINLTCGQDFPLKTNREIVQHLKG..FKGKNITPGVLP  
HSC 166 RLQADLNCMKDLVASEVPWKYVINLTCGQDFPLKTNREIVQHLKG..FKGKNITPGVLP  
MmAC 166 RLQADLNCMKDLVASEVPWKYVINLTCGQDFPLKTNREIVQHLKG..FKGKNITPGVLP  
CFC 166 RLQADLNCMKDLAASQVPWKYAINLTCGQDFPLKTNKEIVRHLKG..FKGKNITPGVLP  
MDB 166 RLQADLNCMKDLVASQIQWKYLINTCGQDFPLKTNKEIQHLKG..FKGKNITPGVLP  
MmSA 164 RLQADLNCMKDLVASKIPWKYVINLTCGQDFPLKTNKEIVQYLKR..FKGKNITPGVLP  
RNA 164 RLQADLNCMRDLVASKVPWKYVINLTCGQDFPLKTNREIQYLKG..FKGKNITPGVLP  
PTA 166 RLQADLNCMLDLVASEVPWKYVINLTCGQDFPLKTNREIVQYLKG..FKGKNITPGVLP  
HSA 166 RLQADLNCMLDLVASEVPWKYVINLTCGQDFPLKTNREIVQYLKG..FKGKNITPGVLP  
MmAA 166 RLQADLNCMLDLVASEVPWKYVINLTCGQDFPLKTNREIVQYLKR..FKGKNITPGVLP  
CFA 166 RLQADLNCMKDLGASEVPWKYAINLTCGQDFPLKTNKEIVRYLKG..FKGKNITPGVLP  
PTB 164 RLQADLNCIRDLSAFEVSWKYVINLTCGQDFPLKTNKEIVQYLKG..FKGKNITPGVLP  
HSB 164 RLQADLNCIRDLSAFEVSWKYVINLTCGQDFPLKTNKEIVQYLKG..FKGKNITPGVLP  
MmAB 164 RLQADLNCIKDLSAFEVSWKYVINLTCGQDFPLKTNKEIVQYLKG..FKGKNITPGVLP  
MmSB 164 RLQADLNCIKDLSTSEVPWKYAINLTCGQDFPLKTNKEIVQYLKG..FKGKNITPGVLP  
RNB 164 RLQADLNCIRDLSTSEVPWKYAINLTCGQDFPLKTNKEIVQYLKG..FKGKNITPGVLP  
CFB 164 RLQADLNCIKDLAASQVPWKYAINLTCGQDFPLKTNKEIVRYLKG..YRGNITPGVLP  
MDA 163 RLQADLNCMKDLVASQIQWKYLINTCGQDFPLKTNKEIQHLKG..FKGKNITPGVLP  
DR 181 RLQADLNCMKDLVSEPIQWKYVINLTCGQDFPIQTNLELVRYMQTPEWKRDNMTPGILKQDP

GGA 223 HVTARTKYVHREQLYSLFSFMLPMFVHKAPPPHNLTYFGSAYLAVTRPFAEFVLQDPRA  
GGB 221 HVTMTRFMHELEQGGSNVSELVTPQVHKAPPPHNLTYFGSAYLAVTRPFAEFVLQDPRA  
XTA 221 HAIPTRTKYVHRE..DIVNSRVVTRVRLKPPPPHNTIYFGSAYVALTREFTRFLEEDQRA  
XTB 224 HAIPTRTKYVHRE..DIVNSRVVTRVRLKPPPPHNTIYFGSAYVALTREFTRFLEEDQRA  
MmSC 222 YIVVTRTKYVHQERKKGIDGYFMHKTINILKTPPPHNTIYFGTAYVALTRDFVNFILNDERA  
RNC 222 HVIPTRTKYVHREKRCRGGFVKNINILKTPPPHNTIYFGTAYVALTRDFVNFILNDKRA  
PTC 224 HAIKRTKYVHQEHTDKGGFVKNINILKTPPPHNTIYFGTAYVALTRDFVDFVLRDQRA  
HSC 224 HAIKRTKYVHQEHTDKGGFVKNINILKTPPPHNTIYFGTAYVALTRDFVDFVLRDQRA  
MmAC 224 HAIKRTKYVHQEHTDKGGFVKNINILKTPPPHNTIYFGTAYVALTRDFVNFVLDKKA  
CFC 224 HAVKRTKYVHREHICGDGSEVKNINVLKTPPPHNTIYFGTAYVALTRDFVDFVLDKKA  
MDB 224 HAIERTKYVHREHISQKASYMEKTKILKSPPPHNTIYFGSAYVALTREFVNFVQDHRRA  
MmSA 222 HAVGRTKYVHQELLDHKNPVYHNTARLKAAPPPHNTIYFGTAYVALTRDFANFVLQDQRA  
RNA 222 HAVGRTKYVHQELLDLKNPVYHNTARLKAAPPPHNTIYFGTAYVALTRDFANFVLQDQRA  
PTA 224 HAVGRTKYVHQELLDHKNSYVILKTKLTPPPHNTIYFGTAYVALTRDFANFVLQDQRA  
HSA 224 HAVGRTKYVHQELLDHKNSYVILKTKLTPPPHNTIYFGTAYVALTRDFANFVLQDQRA  
MmAA 224 HAVGRTKYVHQELLDHKNSYVILKTKLTPPPHNTIYFGTAYVALTRDFANFVLQDQRA  
CFA 224 HAIERTKYVHRELLSKKNSYMLKTKLTPPPHNTIYFGTAYVALTRDFANFVLQDQRA  
PTB 222 HAIERTKYVHQEHLGKELSYVIRTAALKPPPPHNTIYFGSAYVALSREFANFVLHDPRA  
HSB 222 HAIERTKYVHQEHLGKELSYVIRTAALKPPPPHNTIYFGSAYVALSREFANFVLHDPRA  
MmAB 222 HAIERTKYVHQEHLGKELSYVIRTAALKPPPPHNTIYFGSAYVALSREFANFVLHDPRA  
MmSB 222 HAIERTKYVHQEHLGKELSYVIRTAALKPPPPHNTIYFGSAYVALSREFANFVLHDPRA  
RNB 222 HAIERTKYVHQEHLGKELSYVIRTAALKPPPPHNTIYFGSAYVALSREFANFVLHDPRA  
CFB 222 HAIERTKYVHQEHLGKELSYVIRTAALKPPPPHNTIYFGSAYVALSREFANFVLHDPRA  
MDA 221 HAIERTKYVHQEHLGLEASVYVINTQALKSPPPHNTIYFGSAYVALTREFANFVLQDQRA  
DR 241 SMRYRTAF...QYVEVKNTHVAQGRKKGPPPHNTIYFGTAYVALTRPFAEFVLQDPRA

GGA 283 IDLLAWSKDTYSPDEHFVWTLNRI  
GGB 281 IDLLAWSKDTYSPDEHFVWTLNRI  
XTA 279 TNLLEWSKDTYSPDEHYWVTLNRI  
XTB 282 TNLLEWSKDTYSPDEHYWVTLNRI  
MmSC 282 LALLEWSKDTYSPDEHFVWTLNRI  
RNC 282 IDLLEWSKDTYSPDEHFVWTLNRI  
PTC 284 IDLLAWSKDTYSPDEHFVWTLNRVS  
HSC 284 IDLLEWSKDTYSPDEHFVWTLNRVS  
MmAC 284 IDLLEWSKDTYSPDEHFVWTLNRVS  
CFC 284 IDLLEWSKDTYSPDEHFVWTLNRI  
MDB 284 IDLLEWSKDTYSPDEHFVWTLNRIT  
MmSA 282 VDLLEWSKDTYSPDEHFVWTLNRI  
RNA 282 LDLEWSKDTYSPDEHFVWTLNRI  
PTA 284 LDLLEWSKDTYSPDEHFVWTLNRI  
HSA 284 LDLLEWSKDTYSPDEHFVWTLNRI  
MmAA 284 LDLLEWSKDTYSPDEHFVWTLNRI  
CFA 284 LDLLEWSKDTYSPDEHFVWTLNRI  
PTB 282 VDLLEWSKDTYSPDEHFVWTLNRI  
HSB 282 VDLLEWSKDTYSPDEHFVWTLNRI  
MmAB 282 VALLEWSKDTYSPDEHFVWTLNRI  
MmSB 282 VDLLEWSKDTYSPDEHFVWTLNRI  
RNB 282 VDLLEWSKDTYSPDEHFVWTLNRI  
CFB 282 VDLLEWSKDTYSPDEHFVWTLNRI  
MDA 281 IDLLEWSKDTYSPDEHFVWTLNRI  
DR 298 KDLLEWSKDTYSPDEHYWVTLNRI
