# Supplementary material for: Adaptive evolution of multiple-variable exons and structural diversity of drug-metabolizing enzymes
Source: PubMed Central journal article supplement (PMC1885805; doi:10.1186/1471-2148-7-69), 2007-05-02

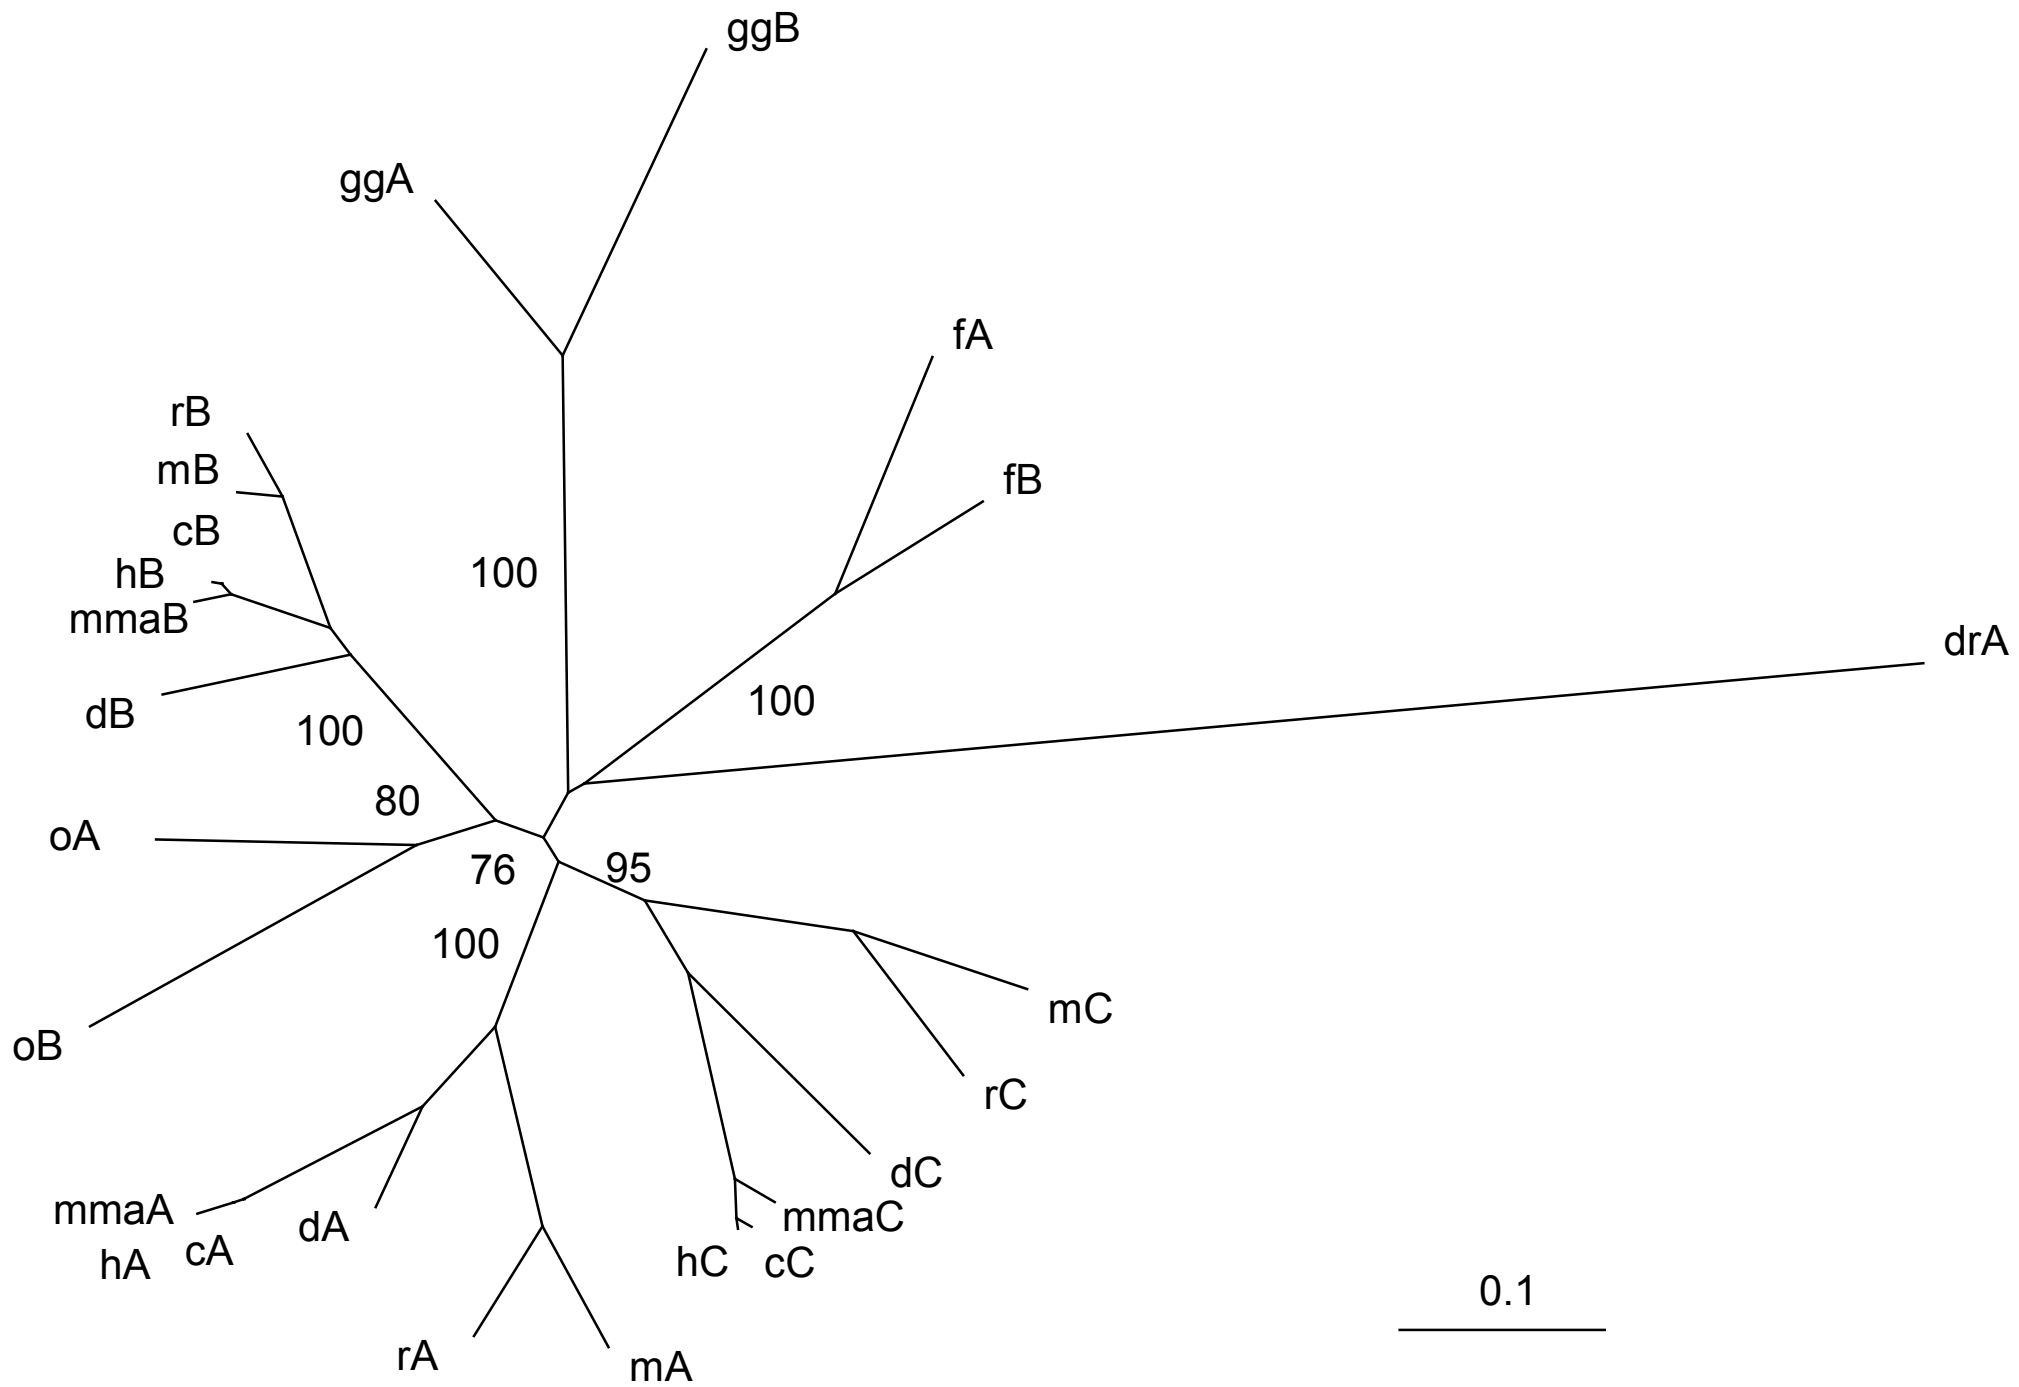

Supplement: 1471-2148-7-69-S8.pdf [file 1471-2148-7-69-S8.pdf]
