# Supplementary material for: Adaptive evolution of multiple-variable exons and structural diversity of drug-metabolizing enzymes
Source: PubMed Central journal article supplement (PMC1885805; doi:10.1186/1471-2148-7-69), 2007-05-02
Supplement: 1471-2148-7-69-S9.pdf [file 1471-2148-7-69-S9.pdf]

```

HS      1  VPGSM.PNASWTGNLRAIKWSDME.DRHGGCHGHYVHGICITYGNGDLKWL VNSPSLFANK
PT      1  VPGSM.PNASWTGNLRAIKWSDME.DRHGGCHGHYVHGICITYGNGDLKWL VNSPSLFANK
MMa    1  VPGSM.PNASWTGNLRAIKWSDME.DSHGGCHGHYVHGICITYGNGDLKWL VNSPSLFANK
CF      1  VPGSM.PNASWTGNLRAIKWIDME.DKHGGCHGRYVRGICITYGNGDLKWL IDSPSLFANK
MMs    1  VPGSM.PNASWTGNLRAVKWMDME.AKHGGCHGHYVHGICITYGNGDLQWLINSQSLFANK
RN      1  VPGSM.PNASWTGNLRAVKWDMK.SQNGACHGHYVHDICITYGNGDLQWLINSQSLFANK
MD      1  VPGSM.PNASWEGNLRAIKWHDME.KDHGGCHGHYIHGICIFGNGDLKWL YDSPNMFANK
GG      1  VPGSM.PNASWEGGLKAVKWIDME.DIHGGCHGHYVRGICVYGTGDLKWL FNSTCMFANK
XT      1  VPGS.APDASWEGQLRAVKWDMK.DQE.KCHGHYVRDICYGTGDLQWL MNSRSIFANK
DR      1  APGSNV.EGEWEGNVRRAVKWSDQGTAHQGCKGQYIRGICVYGI GDLPLIEKESMFANK
          *                *

```

```

HS      59  FELNTYPLTVECLELRHRERTLNQSETAIQPSWYF~~~~~
PT      59  FELNTYPLTVECLELRHRERTLNQSETAIQPSWYF~~~~~
MMa    59  FELNTYPLTVECLELRHRERTLNQSETAIQPSWYF~~~~~
CF      59  FELTYPLTVECLELRERERTLNQSETVIQPSWYF~~~~~
MMs    60  FELNTYPLTVECLELRERERTLNQSEIAIQPSWYF~~~~~
RN      59  FEVNTYPLTVECLELRERERTLNQSDIALQPSWHF~~~~~
MD      59  FELKTYPLTVECLELRERERTLNQSETPIRSSWYL~~~~~
GG      59  FELRTYPLTVECLELRHRKRTLAQSEVQVEPNWYF~~~~~
XT      58  FEAKSYPPIVECLELKVREERTLNQSEVTPPEWYL~~~~~
DR      60  FEMASFPEALDCMELWHRHKVLOQATVPIQPSWHLTTEVEVVNRTLILTPGDCV
          *

```
