# Supplementary material for: Adaptive evolution of multiple-variable exons and structural diversity of drug-metabolizing enzymes
Source: PubMed Central journal article supplement (PMC1885805; doi:10.1186/1471-2148-7-69), 2007-05-02
Supplement: 1471-2148-7-69-S13.pdf [file 1471-2148-7-69-S13.pdf]

Mms 1 RPTTLCE TMGKAEIWLIRTYWDFEFPRPYLPNFEFVGGLHCKPAKPLPKEME EFVQTSGE  
RN 1 RPTTLCE TMGKAEIWLIRTYWDFEFPRPYLPNFEFVGGLHCKPAKPLPKEME EFVQTSGE  
CF 1 RPTTLCE TMGKAEIWLIRTYWDFEFPRPYLPNFEFVGGLHCKPAKPLPKEME EFVQSSGE  
PT 1 RPTTLCE TMGKAEIWLIRTYWDFEFPRPYLPNFEFVGGLHCKPAKPLPKEME EFVQSSGK  
HS 1 RPTTLCE TMGKAEIWLIRTYWDFEFPRPYLPNFEFVGGLHCKPAKPLPKEME EFVQSSGK  
MMa 1 RPTTLCE TMGKAEIWLIRTYWDFEYPPYQPNFEFVGGLHCKPAKPLPKEME NFVQSSGE  
DR 1 KPTTMCETMGKADIWLIRTYWDFEYPRPFPNFKFVGGLHCKPAKPLSKEME EFVQSSGD

Mms 61 HGIVVFSLGS MVKNLTDEKANLIASALAQIPQKVLWRYKGIKIPDTLGSNTRLFDWIPQND  
RN 61 HGVVFSLGS MVKNLTEEKANLIASALAQIPQKVLWRYKGIKIPATLGSNTRLFDWIPQND  
CF 61 DGVVFSLGS MVKNLTDEKANLIASALAQIPQKVLWRYKGNKIPATLGINTRLYDWIPQND  
PT 61 DGVVFSLGS MVKNLTEEKANLIASALAQIPQKVLWRYKGGKIPATLGNNTQLFDWIPQND  
HS 61 NGVVFSLGS MVKNLTEEKANLIASALAQIPQKVLWRYKGGKIPATLGNNTQLFDWIPQND  
MMa 61 DGIIVVFSLGS LFNVT EKANLIASALAQIPQKVLWRYKGGKIPSTLGINTRLYDWIPQND  
DR 61 HGVVFSLGS MTKNLT SERANTIAAALGQIPQKVWVRYSGKIPETLAPNTKIYDWIPQND

Mms 121 LLGHPKTRAFITHG GTNGIYEAIYHGIPMVGVPMFADQPDNIAHMKAKGA AAVEVNMNTMT  
RN 121 LLGHPKTRAFITHG GTNGIYEAIYHGIPMVGVPMFADQPDNIAHMKAKGA AAVEVNMNTMT  
CF 121 LLGHPKTKAFITHG GTNGIYEAIYHGVP MVGVPMFADQPDNIAHMKAKGA AAVEVNI NTMT  
PT 121 LLGHPKTKAFITHG GTNGIYEAIYHGVP MVGVPMFADQPDNIAHMKAKGA AAVEVNL NTMT  
HS 121 LLGHPKTKAFITHG GTNGIYEAIYHGVP MVGVPMFADQPDNIAHMKAKGA AAVEVNL NTMT  
MMa 121 LLGHPQTKAFITHG GMNGIYEAIYHGVP MVGVPIFGDQPDNIAHMKAKGA AVEINFKTMT  
DR 121 LLGHPKTKAFITHG GTNGIYEAIYHGVP MVGLPLFADQPDNLLHMKTKGA AVLDINTLE

Mms 181 SSDLLNALRTVINEPSYKENAMRLSRIHHDQPVKPLDRAVFWIEFVMRHKGAKHLRVA AH  
RN 181 SADLLSAVRAVINEPFYKENAMRLSRIHHDQPVKPLDRAVFWIEFVMRHKGAKHLRVA AH  
CF 181 SADLLHALRTVINEPSYKENA IRLSRIHHDQPVKPLDRAVFWIEFVMRHKGAKHLRPA SH  
PT 181 SVDLLSALRTVINEPSYKENAMRLSRIHHDQPVKPLDRAVFWIEFVMRHKGAKHLRVA AH  
HS 181 SVDLLSALRTVINEPSYKENAMRLSRIHHDQPVKPLDRAVFWIEFVMRHKGAKHLRVA AH  
MMa 181 SEDLLRAVRTVITDS SYKENAMRLSRIHHDQSVKPLDRAVFWIEFVMRHKGAKHLR SAAH  
DR 181 SKDLVDALKTVLNNPSYKESIMRLSRIHHDQPMKPLDQAVYWIEFVMRNK GAKHLRVQAH

Mms 241 DLSWFQYHSLDVIGFLLACVASA ILLVAKCCLFIFQK.VGKTGK KKKRD~~~~~  
RN 241 DLSWFQYHSLDVIGFLLACMASA ILLVAKCCLFVQK.IGKTGK KKKRD~~~~~  
CF 241 DLTWFQYHSLDVIGFLLACVATAIFLVTKCCLFSCRK.FNKAGK KKKRE~~~~~  
PT 241 NLTWFQYHSLDVIGFLLVCVTTAIFLVIQCCLFSCQK.FVKIGK KKKRE~~~~~  
HS 241 DLTWFQYHSLDVIGFLLVCVTTAIFLVIQCCLFSCQK.FGKIGK KKKRE~~~~~  
MMa 241 DLNWFQYHSLDVIAFLLACVATAIFLFRCLFSCQN.FNKTRKIEKRE~~~~~  
DR 241 ELSWYQYHCLDVA AFLSITALITFLWKTCCFLFRRCVRKTHPERKTQKSKKE

Transmembrane segment \_\_\_\_\_
