# Supplementary material for: Adaptive evolution of multiple-variable exons and structural diversity of drug-metabolizing enzymes
Source: PubMed Central journal article supplement (PMC1885805; doi:10.1186/1471-2148-7-69), 2007-05-02
Supplement: 1471-2148-7-69-S15.pdf [file 1471-2148-7-69-S15.pdf]

**Additional file 15. Log-likelihood values and parameter estimates for 13 vertebrate *UGT* groups**

| Human              |              | UGT1       |                                                                                                                             |                                   |                                                                                 |  |
|--------------------|--------------|------------|-----------------------------------------------------------------------------------------------------------------------------|-----------------------------------|---------------------------------------------------------------------------------|--|
| Model <sup>1</sup> | $\ell^2$     | $\kappa^3$ | Estimate of Parameters <sup>4</sup>                                                                                         | LRT( $2\Delta\ell$ ) <sup>5</sup> | Positively Selected Sites <sup>6</sup>                                          |  |
| M0                 | -4579.946207 | 1.8171     | $\omega = -4469.765726$                                                                                                     | N/A                               | None                                                                            |  |
| M1a                | -4469.765726 | 2.21556    | $p_0 = 0.4914$<br>$p_1 = 0.5086$                                                                                            | N/A                               | Not allowed                                                                     |  |
| M2a                | -4467.204119 | 2.26076    | $p_0 = 0.48402$<br>$p_1 = 0.48961$<br>$p_2 = 0.02636$<br>$\omega_2 = 4.34434$                                               | 5.123214<br>$p > 0.05$            | 73 N<br>85 R<br>173 P                                                           |  |
| M3                 | -4461.842346 | 2.14917    | $p_0 = 0.40984$<br>$p_1 = 0.50296$<br>$p_2 = 0.0872$<br>$\omega_0 = 0.05505$<br>$\omega_1 = 0.58631$<br>$\omega_2 = 2.5443$ | 236.207722<br>$p < 0.001$         | 66 S 67 F 69 S 73 N 74 V 79 S<br>85 R 89 T 90 Y 96 D 103 G<br>121 S 173 P 202 V |  |
| M7                 | -4466.625334 | 2.09458    | $p = 0.41737$<br>$q = 0.55151$                                                                                              | N/A                               | Not allowed                                                                     |  |
| M8                 | -4462.183057 | 2.16067    | $p_0 = 0.93622$<br>$p_1 = 0.06378$<br>$p = 0.46916$<br>$q = 0.74336$<br>$\omega = 2.80545$                                  | 8.884554<br>$p < 0.05$            | 66 S 73 N 74 V 79 S 85 R<br>89 T 90 Y 96 D 103 G<br>173 P 202 V                 |  |

| chimpanzee         |              | UGT1       |                                                                                                                              |                                   |                                        |  |
|--------------------|--------------|------------|------------------------------------------------------------------------------------------------------------------------------|-----------------------------------|----------------------------------------|--|
| Model <sup>1</sup> | $\ell^2$     | $\kappa^3$ | Estimate of Parameters <sup>4</sup>                                                                                          | LRT( $2\Delta\ell$ ) <sup>5</sup> | Positively Selected Sites <sup>6</sup> |  |
| M0                 | -4587.579615 | 1.85035    | $\omega = 0.32954$                                                                                                           | N/A                               | None                                   |  |
| M1a                | -4483.262354 | 2.25802    | $p_0 = 0.50276$<br>$p_1 = 0.49724$                                                                                           | N/A                               | Not allowed                            |  |
| M2a                | -4474.178767 | 2.25802    | $p_0 = 0.49047$<br>$p_1 = 0.49063$<br>$p_2 = 0.0189$<br>$\omega_2 = 8.44283$                                                 | 18.167174<br>$p < 0.001$          | 69 S 82 F 85 R<br>90 Y 96 D 173 P      |  |
| M3                 | -4468.881555 | 2.17922    | $p_0 = 0.42923$<br>$p_1 = 0.5333$<br>$p_2 = 0.03746$<br>$\omega_0 = 0.06145$<br>$\omega_1 = 0.62704$<br>$\omega_2 = 4.72817$ | 237.39612<br>$p < 0.001$          | 69 S 74 V 82 F<br>85 R 90 Y 96 D 173 P |  |
| M7                 | -4479.23935  | 2.13036    | $p = 0.46155$<br>$q = 0.66339$                                                                                               | N/A                               | Not allowed                            |  |
| M8                 | -4469.127367 | 2.19031    | $p_0 = 0.97269$<br>$p_1 = 0.02731$<br>$p = 0.49495$<br>$q = 0.76549$<br>$\omega = 5.60754$                                   | 20.223966<br>$p < 0.001$          | 69 S 74 V 82 F<br>85 R 90 Y 96 D 173 P |  |

| Rhesus monkey      |              | UGT1       |                                     |         |                                   |                                        |
|--------------------|--------------|------------|-------------------------------------|---------|-----------------------------------|----------------------------------------|
| Model <sup>1</sup> | $\ell^2$     | $\kappa^3$ | Estimate of Parameters <sup>4</sup> |         | LRT( $2\Delta\ell$ ) <sup>5</sup> | Positively Selected Sites <sup>6</sup> |
| M0                 | -4699.455941 | 1.85048    | $\omega =$                          | 0.33039 | N/A                               | None                                   |
| M1a                | -4590.841918 | 2.29792    | $p_0 =$                             | 0.48876 | N/A                               | Not allowed                            |
|                    |              |            | $p_1 =$                             | 0.51124 |                                   |                                        |
| M2a                | -4582.255511 | 2.35105    | $p_0 =$                             | 0.47426 | 17.172814                         | 85 R                                   |
|                    |              |            | $p_1 =$                             | 0.51101 | $p < 0.001$                       | 173 P                                  |
|                    |              |            | $p_2 =$                             | 0.01473 |                                   | 235 S                                  |
|                    |              |            | $\omega_2 =$                        | 8.56278 |                                   |                                        |
| M3                 | -4575.518425 | 2.20155    | $p_0 =$                             | 0.38463 | 247.875032                        | 73 N 79 S 85 R 89 T                    |
|                    |              |            | $p_1 =$                             | 0.57285 | $p < 0.001$                       | 90 Y 173 P 202 V 235 S                 |
|                    |              |            | $p_2 =$                             | 0.04253 |                                   |                                        |
|                    |              |            | $\omega_0 =$                        | 0.04472 |                                   |                                        |
|                    |              |            | $\omega_1 =$                        | 0.58094 |                                   |                                        |
|                    |              |            | $\omega_2 =$                        | 3.74773 |                                   |                                        |
| M7                 | -4582.050067 | 2.18168    | $p =$                               | 0.41253 | N/A                               | Not allowed                            |
|                    |              |            | $q =$                               | 0.56903 |                                   |                                        |
| M8                 | -4573.367194 | 2.22686    | $p_0 =$                             | 0.98229 | 17.365746                         | 73 N 79 S 85 R                         |
|                    |              |            | $p_1 =$                             | 0.01771 | $p < 0.001$                       | 89 T 173 P 202 V 235 S                 |
|                    |              |            | $p =$                               | 0.4268  |                                   |                                        |
|                    |              |            | $q =$                               | 0.6004  |                                   |                                        |
|                    |              |            | $\omega =$                          | 6.30747 |                                   |                                        |

| Baboon             |              | UGT1       |                                     |         |                                   |                                        |
|--------------------|--------------|------------|-------------------------------------|---------|-----------------------------------|----------------------------------------|
| Model <sup>1</sup> | $\ell^2$     | $\kappa^3$ | Estimate of Parameters <sup>4</sup> |         | LRT( $2\Delta\ell$ ) <sup>5</sup> | Positively Selected Sites <sup>6</sup> |
| M0                 | -4688.688005 | 1.84708    | $\omega =$                          | 0.31979 | N/A                               | None                                   |
| M1a                | -4581.695245 | 2.33063    | $p_0 =$                             | 0.48991 | N/A                               | Not allowed                            |
|                    |              |            | $p_1 =$                             | 0.51009 |                                   |                                        |
| M2a                | -4574.153041 | 2.36294    | $p_0 =$                             | 0.47904 | 15.084408                         | 85 R                                   |
|                    |              |            | $p_1 =$                             | 0.50889 | $p < 0.001$                       | 173 P                                  |
|                    |              |            | $p_2 =$                             | 0.01207 |                                   | 202 V                                  |
|                    |              |            | $\omega_2 =$                        | 9.42254 |                                   |                                        |
| M3                 | -4567.186338 | 2.20894    | $p_0 =$                             | 0.39301 | 243.003334                        | 44 G 73 N 79 S 82 F 85 R               |
|                    |              |            | $p_1 =$                             | 0.5637  | $p < 0.001$                       | 90 Y 132 P 173 P 192 I                 |
|                    |              |            | $p_2 =$                             | 0.04329 |                                   | 201 D 202 V 235 S                      |
|                    |              |            | $\omega_0 =$                        | 0.04509 |                                   |                                        |
|                    |              |            | $\omega_1 =$                        | 0.57327 |                                   |                                        |
|                    |              |            | $\omega_2 =$                        | 3.82652 |                                   |                                        |
| M7                 | -4573.069873 | 2.19115    | $p =$                               | 0.41723 | N/A                               | Not allowed                            |
|                    |              |            | $q =$                               | 0.59358 |                                   |                                        |
| M8                 | -4565.370368 | 2.22247    | $p_0 =$                             | 0.98331 | 15.39901                          | 73 N 79 S 82 F 85 R                    |
|                    |              |            | $p_1 =$                             | 0.01669 | $p < 0.001$                       | 132 P 173 P 201 D 202 V                |
|                    |              |            | $p =$                               | 0.43098 |                                   |                                        |
|                    |              |            | $q =$                               | 0.63279 |                                   |                                        |
|                    |              |            | $\omega =$                          | 6.54355 |                                   |                                        |

| Dog                |              | UGT1       |                                                                                                                         |                                   |                                                                                                                                                                                                                                                                                                                                                                                                                                                                                                                                                            |  |
|--------------------|--------------|------------|-------------------------------------------------------------------------------------------------------------------------|-----------------------------------|------------------------------------------------------------------------------------------------------------------------------------------------------------------------------------------------------------------------------------------------------------------------------------------------------------------------------------------------------------------------------------------------------------------------------------------------------------------------------------------------------------------------------------------------------------|--|
| Model <sup>1</sup> | $\ell^2$     | $\kappa^3$ | Estimate of Parameters <sup>4</sup>                                                                                     | LRT( $2\Delta\ell$ ) <sup>5</sup> | Positively Selected Sites <sup>6</sup>                                                                                                                                                                                                                                                                                                                                                                                                                                                                                                                     |  |
| M0                 | -4524.519175 | 1.4809     | $\omega = 0.34333$                                                                                                      | N/A                               | None                                                                                                                                                                                                                                                                                                                                                                                                                                                                                                                                                       |  |
| M1a                | -4403.464553 | 1.76763    | $p_0 = 0.50426$<br>$p_1 = 0.49574$                                                                                      | N/A                               | Not allowed                                                                                                                                                                                                                                                                                                                                                                                                                                                                                                                                                |  |
| M2a                | -4399.948839 | 1.81705    | $p_0 = 0.49389$<br>$p_1 = 0.47215$<br>$p_2 = 0.03396$<br>$\omega_2 = 5.03228$                                           | 7.031428<br>$p < 0.05$            | 85 R 87 I 92 K<br>160 G 176 L                                                                                                                                                                                                                                                                                                                                                                                                                                                                                                                              |  |
| M3                 | -4395.550168 | 1.7596     | $p_0 = 0.19346$<br>$p_1 = 0.44128$<br>$p_2 = 0.36527$<br>$\omega_0 = 0$<br>$\omega_1 = 0.23533$<br>$\omega_2 = 1.21422$ | 257.938014<br>$p < 0.001$         | 8 V 17 L 18 G 24 H 25 Q 34 A 44 A 47 A 51 L 56 V 59 R 60 R 65 A<br>66 T 68 T 69 S 71 G 72 R 73 G 74 V 76 E 77 N 78 V 79 P 84 R 85 R<br>86 V 87 I 89 T 90 Y 91 K 92 K 93 V 94 K 95 E 96 D 97 S 98 A 99 L<br>100 L 102 S 103 A 105 S 106 H 109 H 111 K 112 E 115 A 116 S 118 A<br>121 S 131 L 135 P 139 L 147 F 151 A 153 P 155 S 156 L 157 D 158 F<br>159 Q 160 G 167 P 173 A 175 S 176 L 177 N 180 H 184 L 188 K 190 M<br>192 I 193 F 195 S 197 S 199 L 202 V 206 P 207 Y 208 E 209 P 217 K<br>220 T 222 Q 225 M 227 S 228 A 235 G 239 K 258 A 259 S 262 P |  |
| M7                 | -4399.436303 | 1.66142    | $p = 0.38922$<br>$q = 0.49974$                                                                                          | N/A                               | Not allowed                                                                                                                                                                                                                                                                                                                                                                                                                                                                                                                                                |  |
| M8                 | -4393.857663 | 1.72149    | $p_0 = 0.93491$<br>$p_1 = 0.06509$<br>$p = 0.43441, q = 0.66237, \omega = 3.41597$                                      | 11.15728<br>$p < 0.01$            | 65 A 66 T 78 V 85 R 87 I<br>90 Y 92 K 96 D 106 H 160 G 173 A 176 L                                                                                                                                                                                                                                                                                                                                                                                                                                                                                         |  |

| Mouse              |              | UGT1       |                                                                                                                               |                                   |                                                                                                                                                                                                                                                                                                                                           |  |
|--------------------|--------------|------------|-------------------------------------------------------------------------------------------------------------------------------|-----------------------------------|-------------------------------------------------------------------------------------------------------------------------------------------------------------------------------------------------------------------------------------------------------------------------------------------------------------------------------------------|--|
| Model <sup>1</sup> | $\ell^2$     | $\kappa^3$ | Estimate of Parameters <sup>4</sup>                                                                                           | LRT( $2\Delta\ell$ ) <sup>5</sup> | Positively Selected Sites <sup>6</sup>                                                                                                                                                                                                                                                                                                    |  |
| M0                 | -5362.461457 | 1.74243    | $\omega = 0.37507$                                                                                                            | N/A                               | None                                                                                                                                                                                                                                                                                                                                      |  |
| M1a                | -5251.296323 | 2.06104    | $p_0 = 0.5134$<br>$p_1 = 0.4866$                                                                                              | N/A                               | Not allowed                                                                                                                                                                                                                                                                                                                               |  |
| M2a                | -5250.0753   | 2.11421    | $p_0 = 0.4977$<br>$p_1 = 0.45687$<br>$p_2 = 0.04544$<br>$\omega_2 = 2.77215$                                                  | 2.442046<br>$p > 0.05$            | 65 A<br>69 E<br>71 G<br>72 R 91 M                                                                                                                                                                                                                                                                                                         |  |
| M3                 | -5233.547367 | 2.04632    | $p_0 = 0.22884$<br>$p_1 = 0.53115$<br>$p_2 = 0.24001$<br>$\omega_0 = 0.02385$<br>$\omega_1 = 0.35809$<br>$\omega_2 = 1.45111$ | 257.82818<br>$p < 0.001$          | 24 Q 25 Q 40 H 44 G 47 S 60 K 64 T 65 A 66 T 68 V 69 E<br>71 G 72 R 73 T 74 A 76 N 77 Q 78 D 79 S 82 F 83 L 84 L<br>85 R 86 V 88 K 89 I 90 Y 91 M 92 K 93 V 95 R 96 D 98 S<br>100 L 105 S 106 H 111 A 112 E 115 A 121 H 142 T 149 L<br>151 K 152 L 155 S 158 S 167 L 173 S 188 K 190 V 191 L<br>192 L 195 S 201 R 202 V 209 S 227 P 258 L |  |
| M7                 | -5240.642609 | 1.94832    | $p = 0.51704$<br>$q = 0.63706$                                                                                                | N/A                               | Not allowed                                                                                                                                                                                                                                                                                                                               |  |
| M8                 | -5235.409624 | 2.04022    | $p_0 = 0.86729$<br>$p_1 = 0.13271$<br>$p = 0.65805$<br>$q = 1.15583$<br>$\omega = 1.80595$                                    | 10.46597<br>$p < 0.01$            | 65 A 66 T 69 E 71 G 72 R 73 T<br>74 A 76 N 78 D 79 S 83 L 85 R<br>86 V 90 Y 91 M 92 K 93 V 96 D<br>98 S 100 L 112 E 121 H 142 T<br>151 K 152 L 192 L 195 S 201 R                                                                                                                                                                          |  |

| Rat                |              | UGT1       |                                                                                                                               |                                   |                                                                                                                                                                                                                                                                                                                              |  |
|--------------------|--------------|------------|-------------------------------------------------------------------------------------------------------------------------------|-----------------------------------|------------------------------------------------------------------------------------------------------------------------------------------------------------------------------------------------------------------------------------------------------------------------------------------------------------------------------|--|
| Model <sup>1</sup> | $\ell^2$     | $\kappa^3$ | Estimate of Parameters <sup>4</sup>                                                                                           | LRT( $2\Delta\ell$ ) <sup>5</sup> | Positively Selected Sites <sup>6</sup>                                                                                                                                                                                                                                                                                       |  |
| M0                 | -5472.965706 | 1.5423     | $\omega = 0.3483$                                                                                                             | N/A                               | None                                                                                                                                                                                                                                                                                                                         |  |
| M1a                | -5350.67835  | 1.72435    | $p_0 = 0.57007$<br>$p_1 = 0.42993$                                                                                            | N/A                               | Not allowed                                                                                                                                                                                                                                                                                                                  |  |
| M2a                | -5348.251714 | 1.79042    | $p_0 = 0.54558$<br>$p_1 = 0.40942$<br>$p_2 = 0.045$<br>$\omega_2 = 3.45562$                                                   | 4.853272<br>$p > 0.05$            | 65 A 66 A 71 G<br>90 Y 91 N 92 K 100 L                                                                                                                                                                                                                                                                                       |  |
| M3                 | -5326.752004 | 1.74248    | $p_0 = 0.24616$<br>$p_1 = 0.54161$<br>$p_2 = 0.21224$<br>$\omega_0 = 0.02401$<br>$\omega_1 = 0.34448$<br>$\omega_2 = 1.54386$ | 292.427404<br>$p < 0.001$         | 24 Q 25 Q 44 G 47 S 60 N 63 V 64 T 65 A 66 A 69 E<br>71 G 72 R 73 S 74 V 78 D 79 P 82 F 83 L 85 R 86 V<br>89 T 90 Y 91 N 92 K 93 V 95 R 98 S 99 M 100 L 102 S<br>105 S 106 H 111 A 116 S 131 L 142 S 149 L 150 N 151 A<br>155 S 156 L 158 L 173 S 177 N 192 I 195 T 202 V 203 V<br>205 S 206 P 208 G 209 S 222 K 235 N 258 L |  |
| M7                 | -5336.803533 | 1.65271    | $p = 0.52163$<br>$q = 0.73587$                                                                                                | N/A                               | Not allowed                                                                                                                                                                                                                                                                                                                  |  |
| M8                 | -5329.276411 | 1.73862    | $p_0 = 0.87595$<br>$p_1 = 0.12405$<br>$p = 0.67894$<br>$q = 1.353$<br>$\omega = 1.95515$                                      | 15.054244<br>$p < 0.001$          | 60 N 65 A 66 A 69 E 71 G 73 S<br>78 D 79 P 83 L 85 R 89 T 90 Y<br>91 N 92 K 93 V 98 S 100 L 102 S<br>105 S 142 S 158 L 173 S 177 N<br>195 T 202 V 203 V 209 S 258 L                                                                                                                                                          |  |

| Chicken            |              | UGT1       |                                                                                                                              |                                   |                                                                                                                                                                                                                                              |  |
|--------------------|--------------|------------|------------------------------------------------------------------------------------------------------------------------------|-----------------------------------|----------------------------------------------------------------------------------------------------------------------------------------------------------------------------------------------------------------------------------------------|--|
| Model <sup>1</sup> | $\ell^2$     | $\kappa^3$ | Estimate of Parameters <sup>4</sup>                                                                                          | LRT( $2\Delta\ell$ ) <sup>5</sup> | Positively Selected Sites <sup>6</sup>                                                                                                                                                                                                       |  |
| M0                 | -6742.092626 | 2.07232    | $\omega = 0.38713$                                                                                                           | N/A                               | None                                                                                                                                                                                                                                         |  |
| M1a                | -6580.492931 | 2.31284    | $p_0 = 0.57999$<br>$p_1 = 0.42001$                                                                                           | N/A                               | Not allowed                                                                                                                                                                                                                                  |  |
| M2a                | -6567.258855 | 2.46347    | $p_0 = 0.54945$<br>$p_1 = 0.40166$<br>$p_2 = 0.0489$<br>$\omega_2 = 4.74842$                                                 | 26.468152<br>$p < 0.001$          | 69 A 71 L 84 E 87 H 92 K<br>93 V 95 R 98 D 106 W<br>130 V 173 A 203 I 222 I                                                                                                                                                                  |  |
| M3                 | -6555.365391 | 2.31977    | $p_0 = 0.34388$<br>$p_1 = 0.49129$<br>$p_2 = 0.16483$<br>$\omega_0 = 0.06109$<br>$\omega_1 = 0.46493$<br>$\omega_2 = 1.7753$ | 373.45447<br>$p < 0.001$          | 37 A 40 N 47 E 65 D 66 N 69 A 71 L 72 K<br>74 A 76 E 78 G 84 E 85 Q 87 H 88 R 89 L<br>90 Q 92 K 93 V 94 K 95 R 96 L 98 D 99 V<br>102 I 103 S 106 W 109 K 121 N<br>130 V 158 F 173 A 193 D 195 S 197 L<br>199 L 201 D 202 F 203 I 205 K 222 I |  |
| M7                 | -6569.82083  | 2.20258    | $p = 0.50568$<br>$q = 0.68377$                                                                                               | N/A                               | Not allowed                                                                                                                                                                                                                                  |  |
| M8                 | -6552.635115 | 2.33776    | $p_0 = 0.9276$<br>$p_1 = 0.0724$<br>$p = 0.59799$<br>$q = 0.94708$<br>$\omega = 2.97901$                                     | 34.37143<br>$p < 0.001$           | 40 N 69 A 71 L 84 E 87 H 90 Q<br>92 K 93 V 95 R 98 D 106 W<br>130 V 173 A 202 F 203 I 222 I                                                                                                                                                  |  |

| Zebrafish          |              | UGT1A      |                                                                                                                               |                                   |                                                                                                                         |  |
|--------------------|--------------|------------|-------------------------------------------------------------------------------------------------------------------------------|-----------------------------------|-------------------------------------------------------------------------------------------------------------------------|--|
| Model <sup>1</sup> | $\ell^2$     | $\kappa^3$ | Estimate of Parameters <sup>4</sup>                                                                                           | LRT( $2\Delta\ell$ ) <sup>5</sup> | Positively Selected Sites <sup>6</sup>                                                                                  |  |
| M0                 | -4318.270545 | 1.42374    | $\omega = 0.28891$                                                                                                            | N/A                               | None                                                                                                                    |  |
| M1a                | -4246.095061 | 1.53385    | $p_0 = 0.72087$<br>$p_1 = 0.27913$                                                                                            | N/A                               | Not allowed                                                                                                             |  |
| M2a                | -4244.528178 | 1.56154    | $p_0 = 0.71681$<br>$p_1 = 0.26392$<br>$p_2 = 0.01928$<br>$\omega_2 = 4.0526$                                                  | 3.133766<br>$p > 0.05$            | 66 N 70 E<br>101 S<br>173 Y<br>202 S                                                                                    |  |
| M3                 | -4238.240721 | 1.51694    | $p_0 = 0.44515$<br>$p_1 = 0.45953$<br>$p_2 = 0.09532$<br>$\omega_0 = 0.07075$<br>$\omega_1 = 0.39859$<br>$\omega_2 = 1.79333$ | 160.059648<br>$p < 0.001$         | 57 S 64 A 65 E 66 N 67 L 69 K<br>70 E 72 Q 73 N 84 T 88 V 91 R<br>94 L 95 Q 97 L 101 S 173 Y<br>197 G 202 S 206 S 258 V |  |
| M7                 | -4246.880684 | 1.48292    | $p = 0.60474$<br>$q = 1.23665$                                                                                                | N/A                               | Not allowed                                                                                                             |  |
| M8                 | -4238.036997 | 1.51677    | $p_0 = 0.92152$<br>$p_1 = 0.07848$<br>$p = 0.90846$<br>$q = 2.62772$<br>$\omega = 1.9508$                                     | 17.687374<br>$p < 0.001$          | 57 S 65 E 66 N 67 L 70 E 73 N<br>84 T 88 V 91 R 94 L 97 L<br>101 S 173 Y 202 S 206 S 258 V                              |  |

| Zebrafish          |              | UGT1B      |                                                                                                                               |                                   |                                                                                                                                                                                                                                                                                |  |
|--------------------|--------------|------------|-------------------------------------------------------------------------------------------------------------------------------|-----------------------------------|--------------------------------------------------------------------------------------------------------------------------------------------------------------------------------------------------------------------------------------------------------------------------------|--|
| Model <sup>1</sup> | $\ell^2$     | $\kappa^3$ | Estimate of Parameters <sup>4</sup>                                                                                           | LRT( $2\Delta\ell$ ) <sup>5</sup> | Positively Selected Sites <sup>6</sup>                                                                                                                                                                                                                                         |  |
| M0                 | -3821.397591 | 1.60209    | $\omega = 0.25823$                                                                                                            | N/A                               | None                                                                                                                                                                                                                                                                           |  |
| M1a                | -3754.061545 | 1.92987    | $p_0 = 0.6209$<br>$p_1 = 0.3791$                                                                                              | N/A                               | Not allowed                                                                                                                                                                                                                                                                    |  |
| M2a                | -3754.061545 | 1.92987    | $p_0 = 0.6209$<br>$p_1 = 0.23285$<br>$p_2 = 0.14626$<br>$\omega_2 = 1$                                                        | 0<br>$p > 0.05$                   |                                                                                                                                                                                                                                                                                |  |
| M3                 | -3746.892296 | 1.88372    | $p_0 = 0.38952$<br>$p_1 = 0.40644$<br>$p_2 = 0.20404$<br>$\omega_0 = 0.03238$<br>$\omega_1 = 0.30138$<br>$\omega_2 = 1.15784$ | 149.01059<br>$p < 0.001$          | 40 L 59 S 61 E 62 Q 63 L 66 S 67 L 69 K 70 G 73 Q<br>75 V 76 F 77 T 79 S 81 A 84 M 85 D 87 F 88 V 89 Q<br>90 L 91 E 94 L 96 F 97 T 99 S 100 Q 101 V 102 E<br>104 C 153 P 159 L 176 G 182 N 190 F 194 G 198 V<br>199 L 202 V 205 A 206 S 213 R 221 Y 250 V 251 F<br>258 Q 260 S |  |
| M7                 | -3748.453462 | 1.83922    | $p = 0.44133$<br>$q = 0.89796$                                                                                                | N/A                               | Not allowed                                                                                                                                                                                                                                                                    |  |
| M8                 | -3747.027755 | 1.87853    | $p_0 = 0.84435$<br>$p_1 = 0.15565$<br>$p = 0.59311$<br>$q = 2.16612$<br>$\omega = 1.22287$                                    | 2.851414<br>$p > 0.05$            | 40 L 59 S 62 Q 63 L 66 S 67 L 70 G 73 Q<br>75 V 76 F 77 T 79 S 81 A 85 D 88 V 89 Q<br>90 L 91 E 94 L 99 S 100 Q 101 V 102 E<br>153 P 159 L 176 G 190 F 198 V 199 L<br>202 V 205 A 206 S 213 R 221 Y 250 V 251 F                                                                |  |

| Human              |              | UGT2       |                                                                                                                      |                                   |                                                                                                                                                                                                                                                                                                                                                                                                                                                                                                                          |  |
|--------------------|--------------|------------|----------------------------------------------------------------------------------------------------------------------|-----------------------------------|--------------------------------------------------------------------------------------------------------------------------------------------------------------------------------------------------------------------------------------------------------------------------------------------------------------------------------------------------------------------------------------------------------------------------------------------------------------------------------------------------------------------------|--|
| Model <sup>1</sup> | $\ell^2$     | $\kappa^3$ | Estimate of Parameters <sup>4</sup>                                                                                  | LRT( $2\Delta\ell$ ) <sup>5</sup> | Positively Selected Sites <sup>6</sup>                                                                                                                                                                                                                                                                                                                                                                                                                                                                                   |  |
| M0                 | -6378.440841 | 2.03159    | $\omega = 0.3792$                                                                                                    | N/A                               | None                                                                                                                                                                                                                                                                                                                                                                                                                                                                                                                     |  |
| M1a                | -6223.085308 | 2.15207    | $p_0 = 0.5887$<br>$p_1 = 0.4113$                                                                                     | N/A                               | Not allowed                                                                                                                                                                                                                                                                                                                                                                                                                                                                                                              |  |
| M2a                | -6216.57934  | 2.27307    | $p_0 = 0.57797$<br>$p_1 = 0.38053$<br>$p_2 = 0.0415$<br>$\omega_2 = 3.58045$                                         | 13.011936<br>$p < 0.01$           | 8 M 45 S 47 N 71 F<br>78 N 79 R 97 K 98 D<br>100 H 103 S 133 V 329 N<br>417 S                                                                                                                                                                                                                                                                                                                                                                                                                                            |  |
| M3                 | -6214.925999 | 2.24208    | $p_0 = 0.47633$<br>$p_1 = 0.40777$<br>$p_2 = 0.1159$<br>$\omega_0 = 0.03973, \omega_1 = 0.63079, \omega_2 = 2.25067$ | 327.029684<br>$p < 0.001$         | 8 M 10 G 43 P 45 S 47 N 64 I 67 V 71 F 73 L 75 W 76 L 78 N 79 R<br>81 S 87 R 88 F 90 Q 96 I 97 K 98 D 99 F 100 H 102 V 103 S 104 Q<br>112 K 118 A 128 L 133 V 145 G 153 R 156 P 158 S 160 V 197 Y 206 T<br>207 L 209 W 329 N 377 A 398 N 417 S 422 A                                                                                                                                                                                                                                                                     |  |
| M7                 | -6225.012005 | 2.10748    | $p = 0.21195$<br>$q = 0.29526$                                                                                       | N/A                               | Not allowed                                                                                                                                                                                                                                                                                                                                                                                                                                                                                                              |  |
| M8                 | -6214.456244 | 2.24394    | $p_0 = 0.91863$<br>$p_1 = 0.08137$<br>$p = 0.27687$<br>$q = 0.49562$<br>$\omega = 2.57616$                           | 21.111522<br>$p < 0.001$          | 8 M 10 G 21 D 25 K 35 A 37 G 39 L 40 F 41 I 43 P 44 T 45 S 47 N<br>52 F 56 R 57 V 62 E 63 R 64 I 66 G 67 V 69 K 70 D 71 F 73 L 75 W<br>76 L 77 E 78 N 79 R 80 P 81 S 82 P 87 R 88 F 90 Q 92 M 93 A 95 V<br>96 I 97 K 98 D 99 F 100 H 101 M 102 V 103 S 104 Q 106 I 110 V<br>112 K 118 A 128 L 130 S 133 V 134 F 142 L 143 K 145 G 153 R 156 P<br>158 S 159 T 160 V 163 H 167 V 169 Y 196 S 197 Y 206 T 207 L 209 W<br>211 S 214 S 248 R 250 Y 293 V 296 L 303 L 325 A 329 N 377 A 394 E<br>395 V 398 N 403 V 417 S 422 A |  |

| Mouse              |              | UGT2       |                                                                                                                              |                                   |                                                                                                                                                                                                                                                                                                   |  |
|--------------------|--------------|------------|------------------------------------------------------------------------------------------------------------------------------|-----------------------------------|---------------------------------------------------------------------------------------------------------------------------------------------------------------------------------------------------------------------------------------------------------------------------------------------------|--|
| Model <sup>1</sup> | $\ell^2$     | $\kappa^3$ | Estimate of Parameters <sup>4</sup>                                                                                          | LRT( $2\Delta\ell$ ) <sup>5</sup> | Positively Selected Sites <sup>6</sup>                                                                                                                                                                                                                                                            |  |
| M0                 | -7758.999805 | 1.66263    | $\omega = 0.27134$                                                                                                           | N/A                               | None                                                                                                                                                                                                                                                                                              |  |
| M1a                | -7593.014406 | 1.80026    | $p_0 = 0.6882$<br>$p_1 = 0.3118$                                                                                             | N/A                               | Not allowed                                                                                                                                                                                                                                                                                       |  |
| M2a                | -7592.975076 | 1.80659    | $p_0 = 0.68775$<br>$p_1 = 0.31115$<br>$p_2 = 0.0011$<br>$\omega_2 = 4.46072$                                                 | 0.07866<br>$p > 0.5$              | 159 T                                                                                                                                                                                                                                                                                             |  |
| M3                 | -7584.144422 | 1.73597    | $p_0 = 0.54903$<br>$p_1 = 0.31668$<br>$p_2 = 0.13429$<br>$\omega_0 = 0.06086$<br>$\omega_1 = 0.4633$<br>$\omega_2 = 1.14667$ | 349.710766<br>$p < 0.001$         | 8 M 10 G 24 L 25 R 39 L 43 P 44 S 45 S 47 S 51 T 60 G 63 K 64 I<br>66 S 67 V 69 K 71 F 73 L 74 T 75 W 79 R 87 T 90 K 91 E 95 V 97 E<br>99 F 101 L 102 V 112 K 115 K 118 S 130 S 133 V 145 G 155 S 159 T<br>160 V 184 Q 196 S 197 Y 199 M 209 W 211 Q 214 S 219 A 227 C<br>250 Y 394 E 398 N 458 V |  |
| M7                 | -7588.299719 | 1.69517    | $p = 0.40064$<br>$q = 0.8832$                                                                                                | N/A                               | Not allowed                                                                                                                                                                                                                                                                                       |  |
| M8                 | -7584.514194 | 1.73022    | $p_0 = 0.81062$<br>$p_1 = 0.18938$<br>$p = 0.68851, q = 3.18426, \omega = 1.00774$                                           | 7.57105<br>$p < 0.5$              | 47 S 69 K 71 F 73 L<br>74 T 97 E 99 F<br>159 T 160 V 211 Q                                                                                                                                                                                                                                        |  |

| Rat                | UGT2         |            |                                     |         |                                   |                                                                   |
|--------------------|--------------|------------|-------------------------------------|---------|-----------------------------------|-------------------------------------------------------------------|
| Model <sup>1</sup> | $\ell^2$     | $\kappa^3$ | Estimate of Parameters <sup>4</sup> |         | LRT( $2\Delta\ell$ ) <sup>5</sup> | Positively Selected Sites <sup>6</sup>                            |
| M0                 | -8858.273247 | 1.68898    | $\omega =$                          | 0.29892 | N/A                               | None                                                              |
| M1a                | -8593.840049 | 1.8352     | $p_0 =$                             | 0.63102 | N/A                               | Not allowed                                                       |
|                    |              |            | $p_1 =$                             | 0.36898 |                                   |                                                                   |
| M2a                | -8593.670226 | 1.84778    | $p_0 =$                             | 0.6298  | 0.339646                          | 211 Q                                                             |
|                    |              |            | $p_1 =$                             | 0.36229 | $p > 0.5$                         |                                                                   |
|                    |              |            | $p_2 =$                             | 0.0079  |                                   |                                                                   |
|                    |              |            | $\omega_2 =$                        | 2.32473 |                                   |                                                                   |
| M3                 | -8582.004433 | 1.78155    | $p_0 =$                             | 0.43316 | 552.537628                        | 8 M 10 G 16 V 21 D 24 L 25 R 34 V 35 A 38 A 39 L 42 T 43 P 45 S   |
|                    |              |            | $p_1 =$                             | 0.30836 | $p < 0.001$                       | 46 V 47 S 49 S 51 T 54 I 57 V 58 P 59 F 60 G 61 K 62 E 63 K 64 I  |
|                    |              |            | $p_2 =$                             | 0.25848 |                                   | 66 S 67 V 69 K 70 D 71 F 73 L 74 T 75 W 76 L 77 E 79 R 81 S 82 P  |
|                    |              |            | $\omega_0 =$                        | 0.03241 |                                   | 83 S 85 I 87 T 88 F 89 Y 90 K 91 E 92 M 93 A 94 K 95 V 96 I 97 E  |
|                    |              |            | $\omega_1 =$                        | 0.31256 |                                   | 98 E 99 F 102 V 103 S 104 R 105 G 106 I 108 D 109 G 110 V 111 L   |
|                    |              |            | $\omega_2 =$                        | 1.03414 |                                   | 112 K 115 K 118 T 122 R 123 G 124 K 128 L 129 L 130 S 134 F 143 K |
|                    |              |            |                                     |         |                                   | 145 G 155 S 156 P 158 S 159 T 160 V 166 K 167 V 169 F 176 A 182 T |
|                    |              |            |                                     |         |                                   | 184 Q 188 A 196 S 197 Y 199 M 205 E 206 T 209 W 211 Q 214 S 219 A |
|                    |              |            |                                     |         |                                   | 226 L 227 C 231 G 250 Y 294 K 303 L 320 K 325 A 333 L 334 F 380 P |
|                    |              |            |                                     |         |                                   | 387 K 394 E 395 V 398 N 403 A 410 R 411 A 458 V 460 A             |
| M7                 | -8585.621695 | 1.73674    | $p =$                               | 0.31242 | N/A                               | Not allowed                                                       |
|                    |              |            | $q =$                               | 0.5888  |                                   |                                                                   |
| M8                 | -8581.130328 | 1.78311    | $p_0 =$                             | 0.85585 | 8.982734                          | 47 S 69 K 71 F 74 T 90 K                                          |
|                    |              |            | $p_1 =$                             | 0.14415 | $p < 0.5$                         | 91 E 97 E 102 V 105 G 197 Y                                       |
|                    |              |            | $p =$                               | 0.41843 |                                   | 206 T 209 W 211 Q 394 E                                           |
|                    |              |            | $q =$                               | 1.32916 |                                   |                                                                   |
|                    |              |            | $\omega =$                          | 1.22911 |                                   |                                                                   |

**Model<sup>1</sup>** Maximum likelihood models implemented in the codeml program of the PAML package.

M0, one-ratio; M1a, neutral; M2a, selection; M3, discrete; M7,  $\beta$ ; M8,  $\beta + \omega$ .

$\ell^2$  Estimated log-likelihood values by the codeml program.

$\kappa^3$  Estimated transition/transversion rate ratio by the codeml program.

**Estimation of Parameters<sup>4</sup>**  $\omega = K_A/K_S$  nonsynonymous/synonymous rate ratio;  $p$ =proportion of sites for each site class. M0: one estimated  $\omega$  for all sites; M1a: estimate  $p_0$ =proportion of sites with  $\omega_0=0$ ,  $p_1=1 - p_0$ , proportion of sites with  $\omega_1=1$ ; M2a: estimate  $p_0$  ( $\omega_0=0$ ),  $p_1$  ( $\omega_0=1$ ), and  $\omega_2$ ,  $p_2=1 - p_0 - p_1$ . M3: estimate  $p_0$ ,  $p_1$ ,  $\omega_0$ ,  $\omega_1$ , and  $\omega_2$ ;  $p_2=1 - p_0 - p_1$ . M7: estimate  $p$  and  $q$  (parameters of  $\beta$  distribution of  $\omega$  between 0 and 1). M8: same as M7 except additional site class where an estimated  $\omega$  is allowed.

**LRT( $2\Delta\ell$ )<sup>5</sup>** Statistical likelihood ratio test; comparing the test statistic ( $2\Delta\ell$ ) calculated from paired codeml models (M1a vs M2a; M0 vs M3; and M7 vs M8) with the critical value of chi-square asymptotic distribution with appropriate degrees of freedom (i.e. 2 d.f., 4 d.f., and 2 d.f., respectively).  $2\Delta\ell$  and level of significance are shown for M2a, M3, and M8 models.

**Positively Selected Sites<sup>6</sup>** Codon positions predicted to be under positive selection with a posterior probability  $>0.90$  by one codeml model (M2a, M3, or M8), and  $>0.50$  by at least one other model.
