# Supplementary material for: Adaptive evolution of multiple-variable exons and structural diversity of drug-metabolizing enzymes
Source: PubMed Central journal article supplement (PMC1885805; doi:10.1186/1471-2148-7-69), 2007-05-02
Supplement: 1471-2148-7-69-S16.pdf [file 1471-2148-7-69-S16.pdf]

**Additional file 16. Summary information for 13 vertebrate *UGT* groups analyzed by the codeml**

| UGT1          | Number of exons | $\omega$ | Tree length | Number of $\omega+$ sites | Positively selected $\omega+$ sites                                                                                                                     |
|---------------|-----------------|----------|-------------|---------------------------|---------------------------------------------------------------------------------------------------------------------------------------------------------|
| Human         | 9               | 0.33887  | 6.3116      | 3                         | 73 N 85 R 173 P                                                                                                                                         |
| chimpanzee    | 9               | 0.32954  | 6.37188     | 4                         | 85 R 90 Y 96 D 173 P                                                                                                                                    |
| Rhesus monkey | 10              | 0.33039  | 6.43642     | 3                         | 85 R 173 P 235 S                                                                                                                                        |
| Baboon        | 10              | 0.31979  | 6.51735     | 3                         | 85 R 173 P 202 V                                                                                                                                        |
| Dog           | 10              | 0.34333  | 6.26742     | 12                        | 65 A 66 T 78 V 85 R 87 I 90 Y<br>92 K 96 D 106 H 160 G 173 A 176 L                                                                                      |
| Mouse         | 9               | 0.37507  | 7.23936     | 27                        | 65 A 66 T 69 E 71 G 72 R 73 T 74 A<br>76 N 78 D 79 S 83 L 85 R 86 V 90 Y<br>91 M 92 K 93 V 96 D 98 S 112 E 121 H<br>142 T 151 K 152 L 192 L 195 S 201 R |
| Rat           | 8               | 0.3483   | 7.42187     | 26                        | 60 N 65 A 66 A 69 E 71 G 73 S 78 D<br>79 P 85 R 89 T 90 Y 91 N 92 K 93 V<br>98 S 100 L 105 S 142 S 158 L 173 S<br>177 N 195 T 202 V 203 V 209 S 258 L   |
| Chicken       | 13              | 0.38713  | 7.97652     | 16                        | 40 N 69 A 71 L 84 E 87 H 90 Q 92 K<br>93 V 95 R 98 D 106 W 130 V 173 A<br>202 F 203 I 222 I                                                             |
| Zebrafish a   | 7               | 0.28891  | 5.23699     | 9                         | 65 E 66 N 70 E 88 V 91 R 101 S<br>173 Y 202 S 206 S                                                                                                     |
| Zebrafish b   | 6               | 0.25823  | 5.63854     | 9                         | 62 Q 88 V 89 Q 91 E 99 S 101 V<br>205 A 206 S 250 V                                                                                                     |

| UGT2  | Number of exons | $\omega$ | Tree length <sup>1</sup> | Number of $\omega+$ sites <sup>2</sup> | Positively selected $\omega+$ sites                                                |
|-------|-----------------|----------|--------------------------|----------------------------------------|------------------------------------------------------------------------------------|
| Human | 9               | 0.37917  | 2.9105                   | 11                                     | 8 M 45 S 47 N 78 N 79 R 97 K 98 D<br>100 H 103 S 329 N 417 S                       |
| Mouse | 9               | 0.27134  | 4.15942                  | 10                                     | 47 S 69 K 71 F 73 L 74 T 97 E 99 F<br>159 T 160 V 211 Q                            |
| Rat   | 10              | 0.29892  | 5.02292                  | 14                                     | 47 S 69 K 71 F 74 T 90 K<br>91 E 97 E 102 V 105 G 197 Y<br>206 T 209 W 211 Q 394 E |

**Tree length<sup>1</sup>** Measured as the number of nucleotide substitutions along the tree per codon by the codeml program.

**The  $\omega+$  sites<sup>2</sup>** Codon positions predicted to be under positive selection with a posterior probability >0.90 by one codeml model (M2a, M3, or M8), and >0.50 by at least one other model.

For *Ugt1* sequences, we used only the variable exons. For *Ugt2* sequences, we used full-length sequences but excluded *Ugt2a2* because it shares five constant exons with *Ugt2a1*.
