# Supplementary material for: Adaptive evolution of multiple-variable exons and structural diversity of drug-metabolizing enzymes
Source: PubMed Central journal article supplement (PMC1885805; doi:10.1186/1471-2148-7-69), 2007-05-02
Supplement: 1471-2148-7-69-S17.pdf [file 1471-2148-7-69-S17.pdf]

## Additional file 17. Alignment of the human (h) UGT1 variable sequences with those of the UGT71G1

```

Ugt71g1      1      MSMSDINKNSELIFIPAPGIGHLASALEFAKLLTNHDKNLY
ha8          1      MARTGWTSPIP.LCVSLLLTTC..GFAEAGKLLVVP.MDGSHWFTMQSVVEKLILRGHEVV
ha9          1      MACTGWTSPILP.LCVCLLLTTC..GFAEAGKLLVVP.MDGSHWFTMRSVVEKLILRGHEVV
ha10         1      MARAGWTSPVP.LCVCLLLTTC..GFAEAGKLLVVP.MDGSHWFTMQSVVEKLILRGHEVV
ha7          1      MARAGWTGLLP.LYVCLLLTTC..GFAKAGKLLVVP.MDGSHWFTMQSVVEKLILRGHEVV
ha3          1      MATGLQVPLPWLATGLLLLLSVQPWPAESGKVLVVP.IDGSHWLSMREVLRELHARGHQAV
ha5          1      MATGLQVPLPQLATGLLLLLSVQPWPAESGKVLVVP.TDGSHWLSMREALRDLHARGHQVV
ha4          1      MARGLQVPLPRLATGLLLLLSVQPWPAESGKVLVVP.TDGSPWLSMREALRELHARGHQAV
ha1          1      MAVESQGGRP.LVLGLLLLCVLGPVVSHAGKILLIP.VDGSHWLSMLGAIQQQLQORGHEIV
ha6          1      MACLLR.SFQRISAGVFF.LALWGMVVGDKLLVVP.QDGSHWLSMKDIVEVLSDRGHEIV

Ugt71g1      42     ITVFCIKFPGMPFADSIIKSVLASQPQIQLIDLPEVEPPPQELLKSPEFYILTFLESLIP
ha8          57     VVMPEV.....SWQLGKSLNCTV..KTYSTSYTLE.....DLDREFMDFADAQWKAQ.VR
ha9          57     VVMPEV.....SWQLGRSLNCTV..KTYSTSYTLE.....DLDREFKAFAHAQWKAQ.VR
ha10         57     VVMPEV.....SWQLERSLNCTV..KTYSTSYTLE.....DQNREFMVFAHAQWKAQ.AQ
ha7          57     VVMPEV.....SWQLGRSLNCTV..KTYSTSYTLE.....DQDREFMVFADARWTAP.LR
ha3          60     VLTPEV.....NMHIKEENFFTL..TTYAISWTQD.....EFDRHVLGHTQLFYFETEHFL
ha5          60     VLTPEV.....NMHIKEENFFTL..TTYAISWTQD.....EFDRLLLLGHTQLSFFETEHLL
ha4          60     VLTPEV.....NMHIKEEKFFTL..TAYAVPWTQK.....EFDRVTLGYTQGFFETEHLL
ha1          59     VVLPDA.....SLYIRDGAFYTL..KTYPVPFQRE.....DVKESFVSLGHNHFENDSFL
ha6          58     VVVPEV.....NLLLLKESKYYTR..KIYPVPYDQE.....ELKNRYQSFGNHFAERSFL

Ugt71g1      102    HVKATIKTILSNK.....VVGLVLDFFCVSMIDVGNEFGI
ha8          104    SLFSLFLSSSNGFFNLFFSHCRSLFNDRKLVEYLKESSFDAVFLDPFDACLIVAKYFSL
ha9          104    SIYSLLMGSYNDIFDLFFSNCRSLFKDKLVEYLKESSFDAVFLDPFDNCLIVAKYFSL
ha10         104    SIFSLLMSSSSGFLDLFFSHCRSLFNDRKLVEYLKESSFDAVFLDPFDTCLIVAKYFSL
ha7          104    SAFSLLTSSSNGIFDLFFSNCRSLFKDKLVEYLKESCFDAVFLDPFDACLIVAKYFSL
ha3          108    KKFFRSMAMLNNMSLVYHRSCVELLHNEALIRHLNATSFDVVLTDPVNLCAVLAKYLSI
ha5          108    MKFSRRMAIMNNMSLIIHRSCVELLHNEALIRHLHATSFDVVLTDPFHLCAVLAKYLSI
ha4          108    KRYSRSMAIMNVSLALHRCCVELLHNEALIRHLNATSFDVVLTDPVNLCGAVLAKYLSI
ha1          107    QRVIKYKIKKDSAMLLSGCSHLLHNKELMASLAESSFDVMLTDPFLPCSPIVAQYLSL
ha6          106    TAPQTEYRNMIVIGLYFINCQSLLQDRDTLNFFKESKFDALFTDPALPCGVILAEYLGL

Ugt71g1      137    PSYLFLTSNVGFLSLMLSLKNRQIEEVFDSDRDHQLLNIPGISNQVPSNVLPDACFNKD
ha8          164    PSVVFARGIACHYLEEGAQCPAPLSYVPRILLGFSDAMTFKERVRNHIMHLEEHLFCQYF
ha9          164    PSVVFARGILCHYLEEGAQCPAPLSYVPRILLGFSDAMTFKERVRNHIMHLEEHLLCHRF
ha10         164    PSVVFTRGIFCHHLEEGAQCPAPLSYVPRILLGFSDAMTFKERVNHIVHLEHLLCHRF
ha7          164    PSVVFARGIFCHYLEEGAQCPAPLSYVPRILLGFSDAMTFKERVRNHIMHLEEHLFCPYF
ha3          168    PTVFFLRNIPCDLDFKGTQCPNPSSYIPRLLTTNSDHMTFLQRVKNMLYPLASYICHAF
ha5          168    PAVFFLRNIPCDLDFKGTQCPNPSSYIPRLLTTNSDHMTFLQRVKNMLYPLASYLCHAV
ha4          168    PAVFFWRYIPCDLDFKGTQCPNPSSYIPKLLTTNSDHMTFLQRVKNMLYPLASYICHTF
ha1          167    PTVFFLHALPCSLEFEATQCPNPSSYVPRLSSHSDHMTFLQRVKNMLIAFSQNFLCDVV
ha6          166    PSVYLFRGFPCSLEHTFSRSPDPVSYIPRCYTKFSDHMTFSQRVANFLVNLLEPYLFYCL

Ugt71g1      197    GGYIAYKLAERFRDTKGIIVNTFSDLEQSSIDALYDHDEK.IPIYAVGPLLDLGQPNPK
ha8          224    SKNALEIASEILQTPVTAYDLYSHTSIWLLRTDFVLDYPKPVMPNMIFIGGINCHQGKPLPM
ha9          224    FKNALEIASEILQTPVTEYDLYSHTSIWLLRTDFVLDYPKPVMPNMIFIGGINCHQGKPLPM
ha10         224    FRNALEIASEILQTPVTAYDLYSHTSIWLLRTDFVLDYPKPVMPNMIFIGGINCHQGKPLPM
ha7          224    FKNVLEIASEILQTPVTAYDLYSHTSIWLLRTDFVLEYPKPVMPNMIFIGGINCHQGKPVPM
ha3          228    SAPYASLASELFQREVSVDILSHASVLFRGDFVMDYPRPIMPNMVFIGGINCANRKPLSQ
ha5          228    SAPYASLASELFQREVSVDLVSHASVLFRGDFVMDYPRPIMPNMVFIGGINCANGKPLSQ
ha4          228    SAPYASLASELFQREVSVDLVSYASVLFRGDFVMDYPRPIMPNMVFIGGINCANGKPLSQ
ha1          227    YSPYATLASEFLQREVTVQDLLSASVLFRSDFVKDYPRPIMPNMVFVGGINCLHQNPLSQ
ha6          226    FSKYEELASAVLKRDVDIITLYQVSVWLLRYDFVLEYPRPVMPNMVFIGGINCKRKDLSQ

```
