# Supplementary material for: Adaptive evolution of multiple-variable exons and structural diversity of drug-metabolizing enzymes
Source: PubMed Central journal article supplement (PMC1885805; doi:10.1186/1471-2148-7-69), 2007-05-02
Supplement: 1471-2148-7-69-S18.pdf [file 1471-2148-7-69-S18.pdf]

Additional file 18. Alignment of the chimpanzee (c) UGT1 variable sequences with those of the UGT71G1

```

Ugt71g1      1      MSMSDINKNSELIFIPAPGIGHLASALEFAKLLTNHDKNLY
ca8          1      MARTGWTSPLPLCVSLMLTC...GFAEAGKLLVVP.MDGSHWFTMQSVVEKLILRGHEVV
ca9          1      MACTGWTSPLPLCVCLLLTC...GFAEAGKLLVVP.MDGSHWFTMRSVVEKLILRGHEVV
ca10         1      MACAGWTSPLPLCVCLLLTC...GFAEAGKLLVVP.MDGSHWFTMQSVVEKLILRGHEVV
ca7          1      MARAGWTGLLPLYVCLLLTC...GFAKAGKLLVVP.MDGSHWFTMQSVVEKLILRGHEVV
ca2          1      MATGPQVPLLQLATGVLLLLSVQPWPAESGKVLVVP.IDGSHWLSMREAVRELHARGHQAV
ca4          1      MARGLQVPLPRLATGVLLLLSVQPWPAESGKVLVVP.TDGSHWLSMREALRELHARGHQAV
ca3          1      MATGLQVPLPRLATGVLLLLSVQPWPAESGKVLVVP.TDGSHWLSMREALRELHARGHQAV
ca1          1      MAVESQGGRP.LVLGLLLCVLGPVVS HAGKILLIP.VDGSHWLSMLGAIQQLQQRGHEIV
ca6          1      MACLLRA.FQRI SAGVFF.LALWGMVVGDKLLVVP.QDGSHWLSMKDIVEVLSDRGHEIV

Ugt71g1     42     ITVFCIKFPGMPFADS YIKSVLASQPQIQIDLPEVEPPPQELLKSPEFYILTFLFLESLIP
ca8          57     VVMPEV.....SWQLGKSLNCTV..KTYSTSYTLE.....DL DREFMDFADAQWKAQ.VQ
ca9          57     VVMPEV.....SWQLGRSLNCTV..KTYSTSYTLE.....DL DREFKAFAHAQWKAQ.VR
ca10         57     VVMPEV.....SWQLERSLNCTV..KTYSTSYTLE.....DQ NREFMVFAHAQWKAQ.AQ
ca7          57     VVMPEV.....SWQLGRSLNCTV..KTYSTSYTLE.....DQ DREFMVFADARWTAP.LR
ca2          60     VLTPEV.....NMHIKEEKFFTL..TTYAISWTQD.....EFDRLVLGHTQLYFETEHL
ca4          60     ALTPEV.....NMHIKEENFFTL..TTYAISWTQD.....EFDRLLLGHTQSFFETEHL
ca3          60     VLTPEV.....NMHIKEENFFTL..TTYAISWTQD.....EFD RHLVDHTQLYFETEHL
ca1          59     VLAPDA.....SLYIRDGAFYTL..KTYVPVQRE.....DV KESFVSLGHNVFENDSFL
ca6          58     VVVPEV.....NLLKESKYTR..KIYPVPYDQE.....ELKNRYQSF GNNHFAERSSL

Ugt71g1     102    HVKATIKTILSNK.....VVGLVLDFFFCVSMIDVGNFEGI
ca8          104    SLFSLFLSSSNGFFDLFFSHCRSLFNDRKLV EYLKESSF DAVFLDPFDACGLIVAKYFSL
ca9          104    SIYSLLMGSYNDIFDLFFSNCRSLFKDKKLV EYLKESSF DAVFLDPFDNCGLIVAKYFSL
ca10         104    SIFSLLMSSSSDFDLFFSHCRSLFNDRKLV EYLKESSF DAVFLDPFDTCGLIVAKYFSL
ca7          104    SAFSLLTSSSNGIFDLFFSNCRSLFKDKKLV EYLKESSF DAVFLDPFDACGLIVAKYFSL
ca2          108    KTFKSKMAILKNSSLVLRSCVELLHNEALIRHLNATSFDVVLIDPIYLCGAVLAKYLSI
ca4          108    KRYSRSVAIMNNSLVLRSCVELLHNEALIRHLNATYFDVVL TDPFHLCGAVVAKYLSI
ca3          108    KFFFRSMAMLNMSLVYHRSCVELLHNEALIRHLNAISFDVVL TDPVNLC AAVLAKYLSI
ca1          107    QRVIKTYKIKKDSAMLLSGCSHLLHNKELMASLAESSFDVML TDPFLPCSPIVAQYLSL
ca6          106    TAPQTEYRNMMIVIGLYFINCQSLLDQRDRTL NFFKESKFDALFTDPALPCGVILAEYGL

Ugt71g1     137    PSYLFLTSTNVGFLSLMLS LKNRQIEEVFD DSDRDHQLLNIPGISNQVPSNVL PDACFNKD
ca8          164    PSVVFARGIACHYLEEGAQCPAPLSYVPRILLGFSDAMSFKEKVRNHIMHLEEHLFCQYF
ca9          164    PSVVFTRGILCHYLEEGAQCPAPLSYVPRILLGFSDAMTFKEKVRNHIMHLEEHL LCHR
ca10         164    PSVVFTRGIFCHYLEEGAQCPAPLSYVPRNDLLGFSDAMTFKEKVRVNHIVHLEDHLSQYL
ca7          164    PSVVFARGIFCHYLEEGAQCPAPLSYIPRLLLGFSDAMTFKEKVRVNHIMHLEEHLFCPYF
ca2          168    PAVFFLRNIPCDLDFKGTQCPNPYSYIPKLLTTNSDHMTFLQRVKNMLYPLALS YLCHAL
ca4          168    PAVFFLRNIPCDLDFKGTQCPNPYSYIPKYLTTNSDHMTFLQRVKNMLYPLALS YLCHAL
ca3          168    PTVFFLRNIPCDLDFKGTQCPNPSSYIPRLLTTNSDHMTFVQRVKNMLYPLALS YICHAF
ca1          167    PTVFFLRHALPCSLEFEATQCPNPF SYVPRPLSSSHSDHMTFLQRVKNMLIAFSQNFLCDVV
ca6          166    PSVYLFRGFPCSLEHTF SRSPDPVSYIPRCYTKFS DHMTFSQRVANFLVNLL EPLYFYCL

Ugt71g1     197    GGYIAYYKLAERFRDTKGIIVNTFSDLEQSSIDALYDHDEK.IPPIYAVGPLLDLKGQPNPK
ca8          224    FKNALEIASEILQTPVTAYDLYSHTSIWLLR TDFVLDYPKPVMPNMIFIGGINCHQGKPLPM
ca9          224    FKNALEIASEILQTPVTEYDLYSHTSIWLLR TDFVLDYPKPVMPNMIFIGGINCHQGKPLPM
ca10         224    FRNALEIASEILQTPVTAYDLYSHTSIWLLR TDFVLDYPKPVMPNMIFIGGINCHQGKPLPM
ca7          224    FKNVLEIASEILQTPVTAYDLYSHTSIWLLR TDFVLEYPKPVMPNMIFIGGINCHQGKPVPM
ca2          228    SAPYASLASELFQREVSVDLLSHASVWLFWRDFVMEYPRPIMPNMVF IGGINCANRKPLSQ
ca4          228    SAPYASLASELFQREVSVDLVSHASVWLFRRDFVMDYPRPIMPNMVF IGGINCANRKPLSQ
ca3          228    SAPYASLASELFQREVSVDILSHASVWLF RGFVMDYPRPIMPNMVF IGGVNCASRKPLSQ
ca1          227    YSPYATLASEFLQREVTVQDLLSSASVWLF RSDYPRPIMPNMVFVGGINCLHQNPLSQ
ca6          226    FSKYEELASAVLKRVDVIITLYQKVSVWLL RYDFVLEYPKPVMPNMVF IGGINCKKRKDL SQ

```
