# Supplementary material for: Adaptive evolution of multiple-variable exons and structural diversity of drug-metabolizing enzymes
Source: PubMed Central journal article supplement (PMC1885805; doi:10.1186/1471-2148-7-69), 2007-05-02
Supplement: 1471-2148-7-69-S19.pdf [file 1471-2148-7-69-S19.pdf]

Additional file 19. Alignment of the rhesus monkey (*Macaca mulatta* [mma]) UGT1 variable sequences with those of the UGT71G1

|         |     |                                                                |
|---------|-----|----------------------------------------------------------------|
| Ugt71g1 | 1   | MSMSDINKNSELIFIPAPGIGHLASALEFAKLLTNHDKNLY                      |
| mmaa10  | 1   | MAHTRCISPVPLCLCLLLTTCG...FAEAGKLLVVP.MDGSHWFTMQSVVEKLILRGHEVV  |
| mmaa8   | 1   | MARTRWTSPLVLLCVSLLLTTCG...FAEAGKLLVVP.MDGSHWFTMQSVVEKLILRGHEVV |
| mmaa7   | 1   | MACAGWTGLLPLSVCLLLTTCG...FAEAGKLLVVP.MDGSHWFTMRSVVEKLILRGHEVV  |
| mmaa9   | 1   | MTRTGWSSPLPLCVCLLLTTCG...FAEAGKLLVVP.VDGSHWLSMRSVVEKLILRGHEVV  |
| mmaa4a  | 1   | MATGLQVPLRLATGLLLLLSVQPWAEESGKVLVVP.TDGSHWLSMREAVRELHARGHQAV   |
| mmaa4b  | 1   | MATGLQVPLPQLATGLLLLLSVQPWAEESGKVLVVP.TDGSHWLSMREAVRELHARGHQAV  |
| mmaa5   | 1   | MATGLQVSLPQLATGLLLLLSVQPWAEESGKVLVVP.TDGSHWLSMREAVRELHARGHQVV  |
| mmaa2   | 1   | MATGPQVPLLWLATGLLLLLSVQPWAEESGKVLVVP.IDGSHWLSMREAVRELHARGHQAV  |
| mmaa1   | 1   | MAVESQGRHP.LVLGLLLCLVLPVLCCHAGKMLLIP.VDGSHWLSMLGTIQQLQQRGHEIV  |
| mmaa6   | 1   | ..MAYLLRAFQRISAIEVFFLALWGMVVGDKLLVIP.QDGSHWLSMKDIVEVLSDRGHDIV  |
| Ugt71g1 | 42  | ITVFCIKFPGMPFADSIIKSVLASQPQIQIQLIDLPEVEPPPQELLKSPEFYILTFLESLIP |
| mmaa10  | 57  | VVMPEV.....SWQLGRSLNCTV..KTYSTSYTLE.....DLDFREFMAFAQAQWKAQIQ.  |
| mmaa8   | 57  | VVMPEV.....SWQLGRSLNCTV..KTYSTSYTLE.....DLDFREFMTFAHAQWKAQLR.  |
| mmaa7   | 57  | VVMPEV.....SWQLGRSLNCTV..KTYSTSYTLE.....DQDFREFMVLADAHWTARLQ.  |
| mmaa9   | 57  | VVMPEV.....SWQLGRPLNCTV..KTYSTSYTLE.....DLDFREFKAFQAQWKAQVQ.   |
| mmaa4a  | 60  | VLTPEV.....KMHVKEENFFTL..TTYAIPWTQD.....EFDRLVLGHTQWFFFETEHL   |
| mmaa4b  | 60  | VLTPEV.....KMHVKEENFFTL..TTYAIPWTQD.....EFDRLVLGHTQWFFFETEHL   |
| mmaa5   | 60  | VLTPEV.....NMHIKEDNFFTL..TTYAVPWTQD.....EFDHFLGHSQSFFFETEHL    |
| mmaa2   | 60  | VLTPEV.....NMHIKEDNFFTL..TTYAIPWTQD.....EFDRLMLGHTQMYFETEHL    |
| mmaa1   | 59  | VLAPDA.....SLYIREGAFYTL..KTYVPPVQRE.....DVKESFVSLGHNVFENDSFL   |
| mmaa6   | 58  | VVVPEV.....NLLKESKYTR..KIYPVPYDQE.....EMKNRYQLFGNNHFAERSFL     |
| Ugt71g1 | 102 | HVKATIKTILSNK.....VVGLVLDFFCVSMIDVGNEFGI                       |
| mmaa10  | 104 | SIFSLVMSSTGFFDLFFSHCRSLFNDQKLVEYLKESFFDAVFLDPFDVCGLIVAKYFSL    |
| mmaa8   | 104 | SFFSLFLSSSNGFFDLFFSHCRSLFNDQKLVEYLKESFFDAVFLDPFDGCGLIVAKYFSL   |
| mmaa7   | 104 | SFSLTSSSNGIFDLFFSNCRSLFKDKKLVEYLKESFFDAVFLDPFDGCGLILAKYFSL     |
| mmaa9   | 104 | SIFSLIMSSYNDIFDLFFSNCRSLFKDKKLVEYLKESFFDAVFLDPFDTCGLIVAKYLSL   |
| mmaa4a  | 108 | KRYSRSMAIMNNMSLVFHRSCVELLHNEALIRHLNATSFVDVLLTDPVNLGAVLAKYLSI   |
| mmaa4b  | 108 | KRYSRSMAIMNNMSLVFHRSCVELLHNEALIRHLNATSFVDVLLTDPVNLGAVLAKYLSI   |
| mmaa5   | 108 | MRFSRSMAIMNNISLIHRSCVELLHNEALIRHLNATSFVDVLLTDPFHLCGAVLAKYLSI   |
| mmaa2   | 108 | KTFKSKMAILKNISLVFHRSCVEILHNETLMRHLNATSFVDVLLIDPIYLCGVVLAKEYSI  |
| mmaa1   | 107 | QRVIKTYKIKKDSAMLLSGCSHLLHNKELMASLAESSFDVMLTDPFLPCGPVIAQYLSL    |
| mmaa6   | 106 | TAPQTEYRNMMVIGMYFINCQSLLDVGTLLNFKESKFDALFTDPALPCGVILAEYLG      |
| Ugt71g1 | 137 | PSYFLTNSVGFSLMLSLKNRQIEEVFDDSDRDHQLLNIPGISNQVPSNVLPDACFNKD     |
| mmaa10  | 164 | PSVVFARGIFCHYLEEGAQCPAPLSYVPRELLGFSAMTFKERVNRNVMHLEEHLFCYF     |
| mmaa8   | 164 | PSVVFARGIFCHYLEEGAQCPAPLSYVPRILLGFSAMTFKERVNRNVMHLEEHLFCYF     |
| mmaa7   | 164 | PSVVFARGTFCHYLEEGAQCPAPLSYIPRGLLGFSDAMTFKERVNRNITHLEEHLFCYF    |
| mmaa9   | 164 | PSVVFARGVFCCHYLEEGAQCPAPLSYVPRILLGFSAMTFKERVNRNIMHLEERLLCHR    |
| mmaa4a  | 168 | PTVFFLRNIPCDLDFKGTQCPNPYSYIPKLLTTNSDHMTFLQRVKNMILYPLALSICDAV   |
| mmaa4b  | 168 | PTVFFLRNIPCDLDFKGTQCPNPYSYIPKLLTTNSDHMTFLQRVKNMILYPLALSICHA    |
| mmaa5   | 168 | PTVFFLRNIPCDLDFKGTQCPNPYSYIPKFLTTNSDHMTFLQRVKNMILYPLALSICDTV   |
| mmaa2   | 168 | PAVFFLRNIPCDLDFKGTQCPNPYSYIPKLLTTNSDHMTFLQRVKNMILYPLALSICDAL   |
| mmaa1   | 167 | PTVFFLRNIPCDLDFKGTQCPNPYSYVPRPLSAHSDHMTFLQRVKNMILYPLALSICD     |
| mmaa6   | 166 | PSVYLFGRFPCSLEHTFSSRPNPVSYPKCYTKFSDHMTFPQRVANFLVNLLEPYLFYCL    |
| Ugt71g1 | 197 | GGYIAYYKLAERFRDTKGIIVNTFSDLEQSSIDALYDHDEK.IPPIYAVGPLLDLKGQPNPK |
| mmaa10  | 224 | FKSALEIASEILQTPVTEYDLYNHTSIWLLRTDFVLDPPKPVMPNMVFIGGINCHQKPVPK  |
| mmaa8   | 224 | FKNALEIASEILQTPVTAYDLYSHTSIWLLRTDFVLDYKPKPVMPNMVFIGGINCHQKPVPM |
| mmaa7   | 224 | *KNVLEIASEILQTSVTAYDLYSHTSIWLLRTDFVLDYKPKPVMPNMVFIGGINCHQKPVPM |
| mmaa9   | 224 | FKSALEIASEILQTPVTYDLYHRQISIWLLRMDVLDYKPKPVMPNMVFIGGINCHQKPLPM  |
| mmaa4a  | 228 | SAPYASLASELFEVSVVDLLSHASVWLFVDFVMDYPRPIMPNMVFIGGINCANRKP       |
| mmaa4b  | 228 | SAPYASLASELFEVSVVDLLSHASVWLFVDFVMDYPRPIMPNMVFIGGINCANRKP       |
| mmaa5   | 228 | SVPYASLASELFEVSVVDLLSHASVWLFVDFVMDYPRPIMPNMVFIGGINCANRKP       |
| mmaa2   | 228 | SAPYASLASELFEVSVVDLLSHASVWLFVDFVMDYPRPIMPNMVFIGGINCANRKP       |
| mmaa1   | 227 | YSPYATLASEFLQREVTQVQLLSSASVWLLRSDVFKDYPRPIMPNMAFIGGINCLHQSP    |
| mmaa6   | 226 | FSKYDELASAVLKRVDVITLYQKVSVWLLRYDFVLEYPVMPNMVFIGGTNCKKRKDLSE    |
