# Supplementary material for: Adaptive evolution of multiple-variable exons and structural diversity of drug-metabolizing enzymes
Source: PubMed Central journal article supplement (PMC1885805; doi:10.1186/1471-2148-7-69), 2007-05-02
Supplement: 1471-2148-7-69-S20.pdf [file 1471-2148-7-69-S20.pdf]

Additional file 20. Alignment of the baboon (b) UGT1 variable sequences with those of the UGT71G1

|         |     |                                                                 |
|---------|-----|-----------------------------------------------------------------|
| Ugt71g1 | 1   | MSMSDINKNSELIFIPAPGIGHLASALEFAKLLTNHDKNLY                       |
| ba10    | 1   | MAHTRCTSPVPLCLCLLLTTCG...FAEAGKLLVVP.MDGSHWFTMQSVVEKLILRGHEVV   |
| ba8     | 1   | MARTRWTSPVLLCVSLLLTTCG...FAEAGKLLVVP.MDGSHWFTMQSVVEKLILRGHEVV   |
| ba7     | 1   | MACAGWTGLLPLSVCLLLTTCG...FAEAGKLLVVP.MDGSHWFTMRSVVEKLILRGHEVV   |
| ba9     | 1   | MTRTGWSSPLPLCVCLLLACG...FAEAGKLLVVP.MDGSHWFSMRSVVEKLILRGHEVV    |
| ba5a    | 1   | MATGLQVSLPQLATGLLLLLSVQPWVESGKVLVVP.TDGSHWLSMQDAVRELHARGHQVV    |
| ba5b    | 1   | MATGLQVFLPQLATGLLLLLSVQPWVAESGKVLVVP.ADGSHWLSMREAVRELHARGHQAV   |
| ba4     | 1   | MATGLQVSLPQLATGLLLLLSVQPWVAESGKVLVVP.TDGSHWLSMREAVRELHARGHQAV   |
| ba2     | 1   | MATGPQVPLLWLATGLLLLLSVQPWVAESGKVLVVP.IDGSHWLSMREAVRELHARGHQAV   |
| ba1     | 1   | MAVESQGRHP.LVLGLLLCVLPVLCCHAGKMLLIP.VDGSHWLSMLGAIQQQLQQRGHEIV   |
| ba6     | 1   | MACLLRA.FQRISAGVFF.LALWGMVVGDKLLVIP.QDGSHWLSMKDIVEVLSDRGHDIV    |
| Ugt71g1 | 42  | ITVFCIKFPGMPFADSIIKSVLASQPQIQIDLPEVEPPPQELLKSPEFYILTFLLESILP    |
| ba10    | 57  | VVMPEV.....SWQLGRPLNCTV..KTYSTSYTLE.....DLDFREFMTFAQAQWKAQIQ.   |
| ba8     | 57  | VVMPEV.....SWQLGRSLNCTV..KTYSTSYTLE.....DLDFREFMTFAHAQWKAQLR.   |
| ba7     | 57  | VVMPEV.....SWQLGRSLNCTV..KTYSTSYTLE.....DQDREFMAFAQAQWKAPLR.    |
| ba9     | 57  | VVIPKV.....SWQLGRSLNCTV..KTYSTSYTLE.....VLDREFKAFQAQWKAQVQ.     |
| ba5a    | 60  | VLSPEV.....NMHIKEENFFTL..TTYAVPWTQD.....EFDRFLLGHSQSFFETEHL     |
| ba5b    | 60  | VLTPEV.....NMHIKEENFFTL..TTYAISWTQD.....EYDHLGHTQSFFETEHL       |
| ba4     | 60  | VLTPEV.....NMHIKEENFFTL..TTYAIPWTQD.....EFDRVLGHTQWFFETEHL      |
| ba2     | 60  | VLTPEV.....KMHIEDNFFTL..TTYAIPWTQD.....EFDRVLGHTQLYFETEHL       |
| ba1     | 59  | VLAPDA.....SLYIREGAFYTL..KTYVPVQRE.....DVKESFVSLGHNVFENDSFL     |
| ba6     | 58  | VVVPEV.....NLLKESKYTR..KIYPVPYDQE.....EMKNRYQLFGNNHFAERSFL      |
| Ugt71g1 | 102 | HVKATIKTILSNK.....VVGLVLDFFCVSMIDVGNFEGI                        |
| ba10    | 104 | SIFSLFLSSSSGFFDLVFSHCRSLFNDQKLVEYLKESFFDAVFLDPFDICGLIVAKYFSL    |
| ba8     | 104 | SFFSLFLSSSNGFFDLFFSHCRSLFNDQKLVEYLKESFFDAVFLDPFDACGLIVAKYFSL    |
| ba7     | 104 | SAFSLLTSSSNGIFDLFFSNCRSLFKDKKLVVEYLKESFFDAVFLDPFDGCGILAKYLSL    |
| ba9     | 104 | SIFSLMSSYNDIFDLFFSNCRSLFKDKKLVVEYLKESFFDAVFLDPFDTCGLIVAKYLSL    |
| ba5a    | 108 | MRFSRSMAIMNNSLI IHRSCVELLHNEALIRHLNATSFDVVLTDPFHLGAVLAKYLSI     |
| ba5b    | 108 | MRFSRSMAMNNSLI IHRSCVELLHNEALIRHLNATSFDVVLTDPFHLGAVLAKYLSI      |
| ba4     | 108 | KRYSRSMAIMNNSLVFHRSCVELLHNEALIRHLNATSFDVVLTDVNLGCVVLAKYLSI      |
| ba2     | 108 | KTFKSKMAILKNMSLVFHRSCVELLHNETLMRHLNATSFDVVLIDPIYLCGVVLAKYLSI    |
| ba1     | 107 | RRVIKTYKKIKKDSAMLLSGCSHLLHNKELMVSLAESSFDVMLTDPFLPCGP IVAQYLSL   |
| ba6     | 106 | TAPQTEYRNNMVVIGMYFINCQSLLDVDTLNFLEKSKFDALFTDPALPCGVILA EYGL     |
| Ugt71g1 | 137 | PSYFLFVSNVGFSLMLSLKNRQIEEVFDSDSDRDHQLLNIPGISNQVPSNVLPDACFNKD    |
| ba10    | 164 | PSVVFARGIFCHYLEEGAQCPAPLSYVPRILLGFSAMTFFKERVWNHVIHLEEHLFCCKFI   |
| ba8     | 164 | PSVVFARGIACHYLEEGAQCPAPLSYVPRILLGFSAMTFFKERVWNHVMHLEDHLFCCKYF   |
| ba7     | 164 | PSVVFARGTFCHYLEEGAQCPAPLSYIPRGLLGFSDAMTFFKERVWNHITHLEEHLFCPYF   |
| ba9     | 164 | PSVVFARGIFCHYLEEGAQCPAPLSYVPRILLGFSAMTFFKERVRNHIMHLEERLLCHR     |
| ba5a    | 168 | PTVFFLRNIPCDLDFKGTQCPNPYSYIPKFLTTNSDHMTFLQRVKNMPLYPLALSICYD     |
| ba5b    | 168 | PAVFFLRNIPCDLDFKGTQCPNPYSYIPKFLTTNSDHMTFLQRVKNMPLYPLALSICYA     |
| ba4     | 168 | PAVFFLRNIPCDLDFKGTQCPNPYSYIPKLLTTNSDHMTFLQRVKNMPLYPLALSICYA     |
| ba2     | 168 | PAVFFLRNIPCDLDFKGTQCPNPYSYIPKLLTTNSDHMTFLQRVKNMPLYPLALSICYA     |
| ba1     | 167 | PTVFFLRNALPCSLEFEATQCPNPFYSYVPRPLSAHSDHMTFLQRVKNMLIAFSQNFLCDV   |
| ba6     | 166 | PSVYLFGRGFPCLSLEHTFSRSPNPVSYIPRCYTKFSDHMTFPQRVANFLVNLLEPYLFYCL  |
| Ugt71g1 | 197 | GGYIAYYKLAERFRDRTKGIIVNTFSDLEQSSIDALYDHDEK.IPPIYAVGPLLDLKGQPNPK |
| ba10    | 224 | FKSALEIASEILQTPVTEYDLYSHTSIWLLRTDFVLDPPKPVMPNMVFIGGINCHQGKPLPK  |
| ba8     | 224 | FKNALEIASEILQTPVTEYDLYSHTSIWLLRTDIVLDYKPKVMPNMVFIGGINCHQGKPVPM  |
| ba7     | 224 | LKNVLEIASEILQTSVTAYDLYSHTSIWLLRTDFVLDYKPKVMPNMVFIGGINCHQGKPVPM  |
| ba9     | 224 | FKSALEIASEILQTPVTYDLYSHTSIWLLRTDFVLDYKPKVMPNMVFIGGINCHQGKPLPM   |
| ba5a    | 228 | SVPYASLASELFQREVSVDLLSHASVWLFRSDFVMDYPRPIMPNMVFIGGINCANRKPLSQ   |
| ba5b    | 228 | SVPYASLASELFQREVSVDLLSHASVWLFRSDFVMDYPRPIMPNMVFIGGINCANRKPLSQ   |
| ba4     | 228 | SVPYASLASELFQREVSVDLLSHASVWLFRSDFVMDYPRPIMPNMVFIGGINCANRKPLSR   |
| ba2     | 228 | SAPYASLASELFQREVSVDLLSHASVWLFRGDFVMDYPRPIMPNMVFIGGINCANRKPLSQ   |
| ba1     | 227 | YSPYATLASEFLQREVTQNLSSASVWLLRSDFVKDYPRPIMPNMAFIGGINCLHQSPLSQ    |
| ba6     | 226 | FSKYDELASAVLKRVDVITLYQKVSVWLLRYDFVLEYPRPVMPNMVFIGGTNCKKRKDLSE   |
