# Supplementary material for: Adaptive evolution of multiple-variable exons and structural diversity of drug-metabolizing enzymes
Source: PubMed Central journal article supplement (PMC1885805; doi:10.1186/1471-2148-7-69), 2007-05-02
Supplement: 1471-2148-7-69-S21.pdf [file 1471-2148-7-69-S21.pdf]

Additional file 21. Alignment of the dog (d) UGT1 variable sequences with those of the UGT71G1

```

Ugt71g1      1          MSMSDINKNSELIFIPAPGIGHLASALEFAKLLTNHDKNLYI
da11        1 MAATILTFGPELLC.VCLLLTSGFAEAGKLLVVP.MDGSHWFTMRLVVEQLIQRGHLEVL
da9         1 MAATILTFGPELLC.VCLLLTSGFAEAGKLLVVP.MDGSHWFTMRLVVEQLIQRGHLEVL
da10        1 MAATILTFGPELLC.VCLLLTSGFAEAGKLLVVP.MDGSHWFTMRLVVEQLIQRGHLEVL
da8         1 MAATILTFGPELLC.VCLLLTSGFAEAGKLLVVP.MDGSHWFTMRLVVEQLIQRGHLEVL
da7         1 MAATILTFGPELLC.VCLLLTSGFAEAGKLLVVP.MDGSHWFTMRLVVEQLIQRGHLEVL
da2         1 MAAGFLAPLPVLTGLLLILCDGRWVEGGKLVVVP.MDGSHWLSMKKAVQKLHARGHQMVV
da3         1 MAAGFLAPLPVLTGLLLILCVGRWVEGGKLVVVP.MDGSHWLSMKKAVQKLHARGHQMVV
da4         1 MAAGFLAPLPVLTGLLLILCVGRWVEGGKLVVVP.LDGSHWLSMKKAVQKLHARGHQMVV
da1         1 MAAEAPGPRPLVLGLLLCALSAPVSQGGKLLLIIP.VDGSHWLSMLGVVKQLHQRGHEVVV
da6         1 ~~~~~MARLLHLFQKVFFLMLWGEAVGDKLLVVP.QDGSHWLSMENIVELLSEKGHDIVV

Ugt71g1     43 TVFCIKFPGMPFADSYIKSVLASQPQIQLIDLPEVEPPPQELLKSPEFYILTFLESLIPH
da11        58 IIPEV.....SWQLGKSSNFTV..KTYSTTYNLE.....ELNQKFKTFSDSQWNIRQQ.S
da9         58 IIPEV.....SWQLGKSSNFTV..KTYSTAYNLE.....ELNQMFKTFSDSHWNIRQQ.S
da10        58 IIPEV.....SWQLGKSSNFTV..KTYSTTYNLE.....ELNQMFKNFSDSHWNIRQQ.S
da8         58 IIPEV.....SWQLGKSSNFTV..KTYSTTYNLE.....ELNQMFKNFSYSQWKTQQ.S
da7         58 IIPEV.....SWQLGKSSNFTV..KTYSTTYNLE.....ELNQMFKNFSYSQWKTQQ.S
da2         60 VSPES.....NMHIKEEDFFTL..TTYATPYTQE.....EFDNFMLGQSYLVFQRMSFLK
da3         60 VSPES.....NMHIKEEDFFTL..TTYATPYTQE.....EFDRILLGQSYLVFERMPFLK
da4         60 VSPES.....NMHIKEEDFFTL..TTYAPPYTRE.....EYDRVLLGQRYQVFERVSFLK
da1         60 IASEA.....SVYIKGAAFYTL..KRYVPVFRRE.....DVEATFTSLGRGVFENVPLLR
da6         55 LVPEV.....NLLLKESKHYTR..QIYSVPFGQE.....ELENRYRSFGKNHFAERWLLN

Ugt71g1     103 VKATIKTILSNK.....VVGLVLDFFCVSMIDVGNEFGIP
da11        105 ILSMVLNSSSDFFEHLFLHCKNLFSDPKLVEYIKESSFDAVFLDPFDVCGLIVAKYFSLP
da9         105 LLTMFFDSSSDIFEHLFLHCKNLFRDTTLIEYIKESSFDAVFLDPFDMCGLIVANYFSLP
da10        105 LLTMFFDSSSDIFEHLFLHCKNLFSDPKLVEYIKESSFDAVFLDPFDVCGLIVAKYFSLP
da8         105 SLFLVLSPLKDSLEHLFLHCKNLFSDPKLVEYIKESSFDAVFLDPFDVCGLIVAKYFSLP
da7         105 SLFLVLSPLKDSLEHLFLHCKNLFSDPKLVEYIKESSFDAVFLDPFDVCGLIVAKYFSLP
da2         108 TFLKTMEGLKTATLIFQRSCESLMHNKNLIRHLNASSFDVLLTDPVYPCGAILARYLSLP
da3         108 TFLKTMEALKAALIFQRSCESLMHNKNLIRHLNASSFDVLLTDPVYPCGAILARYLSLP
da4         108 RLLKTVERLKTVTSFYQRSCEGLLHNKNLIRHLNASSFDVLLTDPVHPCGAILARYLSLP
da1         108 RVIKTYKVKEDSALLLSACSHLLHNKELMASLAESSFDAVLTDPFLPCGPIVALYLALP
da6         103 AAQMEYRNSMIVIDMYFTNCQSLLEDSATLSVLRQSKFDALFTDPALPCGVILAEYLGLP

Ugt71g1     138 SYLFLTSNVGFSLMLSLKNRQIEEVFDSDRDHQLLNIPGISNQVPSNVLPDACFNKDG
da11        165 SVVFTRGLFCHFLEESTQCPSPSYVPRIFLGFPDAMSFRERVRNHISHLEEHLFCHYFL
da9         165 SVVFTRGLFCHFLEESTQCPSPSYVPRIFLGFPDAMSFRERVWNHISHLEEHLFCHYFF
da10        165 SVGFTRRLYCHYLEEATQCPSPSYVPRPFSILSDVMSFRERVRNHIFHLEEHLFCHYFL
da8         165 SVGFTRRLYCHYLEEATQCPSPSYVPRPFSILSDVMSFRERVRNHIFHLEEHLFCHYFL
da7         165 SVVFTRGLFCHFFEESTQCPSPLSYVPRPFSMLSDAMSFRERVRNHIFHLEEHLFCHYFL
da2         168 SVFFLRNIPCDLDSEGTQCPNPSSYIPRLLTRNSDHMTFLQRVKNMLYPLAKYICHVSF
da3         168 SVFFLRNIPCDLDSEGTQCPNPSSYIPRLLTRNSDHMTFLQRVKNMLYPLAKYICHVSF
da4         168 SVFFLRNIPCDLDSEGTQCPNPSSYIPRLLTRNSDHMTFLQRVKNMLYPLAKYICHFSF
da1         168 AVFFLHALPCSLDFQGTQCPNPSSYVPRALSLNSDHMTFLQRVKNMLIFLSESFLCNVVY
da6         163 SVYLFRGFPCSLEHTISRSPNPVSYIPRCYTQFSDKMTFPQRVGNYLVNYLETYLFYCLY

Ugt71g1     198 GYIAYYKLAERFRDTKGIIVNTFSDLEQSSIDALYDHDEK.IPPIYAVGPLLDLKGQPNPK
da11        225 KTALEVASEILQTAVTPYDLSHTSIWLLRTDFVFDYPKPVMPNMVFIGGINCQEGKPLPK
da9         225 KTPLEVASEILQTAVTPYDLSHTSIWLLRADFVFDYPKPVMPNMVFIGGINCQEGKPLPK
da10        225 KTALEVASEILQKAVTPYDLSHMSIWLLRTDFVFDYPKPVMPNMVFIGGINCQEGKPLPK
da8         225 KTALEVASEILQKAVTPYDLSHMSIWLLRTDFVFDYPKPVMPNMVFIGGINCQEGKPLPK
da7         225 KTPLEVASEILQTAVTPYDLSHTSIWLLRADFVLDYPKPVMPNMVFIGGINCQEGKTLPK
da2         228 TPYASLASELLQREVSLEDILSSGSVWLFRGDFVLDYPRPIMPNMFFIGGINCANRKPLSQ
da3         228 TPYASLASELLQREVSLVDILSSGSVWLFRGDFVLDYPRPIMPNMFFIGGINCANRKPLSQ
da4         228 TPYASLASELLQREVSLVDILSSGSVWLFRGDFVLDYPRPIMPNMFFIGGINCANRKPLSQ
da1         228 SPYEPLASEVLQKDVTVQELMGSASIWLLKGDFVKDYSRPIMPSMVFVGINCASKNPLSK
da6         223 SKYEDLASNILKRDVHLPTLYRNGSIWLLRYDFVFEYPRPVMPNMVFIGGTNCKMKGVLPQ

```
