# Supplementary material for: Adaptive evolution of multiple-variable exons and structural diversity of drug-metabolizing enzymes
Source: PubMed Central journal article supplement (PMC1885805; doi:10.1186/1471-2148-7-69), 2007-05-02
Supplement: 1471-2148-7-69-S22.pdf [file 1471-2148-7-69-S22.pdf]

Additional file 22. Alignment of the mouse (m) UGT1 variable sequences with those of the UGT71G1

|         |     |                                                                                                                                                                                                                                                                                                                                                                                                                                                                                                                     |
|---------|-----|---------------------------------------------------------------------------------------------------------------------------------------------------------------------------------------------------------------------------------------------------------------------------------------------------------------------------------------------------------------------------------------------------------------------------------------------------------------------------------------------------------------------|
| Ugt71g1 | 1   | MSMSDINKNSELIFIPAPGIGHLASALEFAKLLTNHDKNL                                                                                                                                                                                                                                                                                                                                                                                                                                                                            |
| ma12    | 1   | MAPVAFPTSFFL . . CLLLASGLAQAGRLLVVP . MDGSHWFTMQMVVEKLIHRGHEV                                                                                                                                                                                                                                                                                                                                                                                                                                                       |
| ma13    | 1   | MVPAAFPTSLPLCVCLLLASGLVQAGRLLVVP . MDGSHWFDMQMVVEKLIQRGHEV                                                                                                                                                                                                                                                                                                                                                                                                                                                          |
| ma10    | 1   | MAPADFPASLPLCVCLLLASGLAQAGRLLVVP . MDGSHWFTMQTVVEKLLHKGHEV                                                                                                                                                                                                                                                                                                                                                                                                                                                          |
| ma11    | 1   | MAPAVFPASLPLRVCLLLAFGLAQAGRLLVVP . MDGSHWFSMKMIVEKLSHRGHEV                                                                                                                                                                                                                                                                                                                                                                                                                                                          |
| ma7     | 1   | MACLLPAAQTLPAAGFLFLVLWASVL . GDKLLVVP . QDGSHWLSMKEIVEHLSERGHDI                                                                                                                                                                                                                                                                                                                                                                                                                                                     |
| ma9     | 1   | MACLLPAAQTLPAAGFLFLVLWASVL . GDKLLVVP . QDGSHWLSMKEIVEHLSERGHDI                                                                                                                                                                                                                                                                                                                                                                                                                                                     |
| ma2     | 1   | MDTGLCVPLRGISGLLLLLCALPWAEGAKVLVLP . MEGSQWLSMRDVVRELHARGHQT                                                                                                                                                                                                                                                                                                                                                                                                                                                        |
| ma5     | 1   | MGLRMPLQGLVG . LLLLLCALPWTEGKVLVFP . VGGSHWLSMRDVVRELHAQGHQT                                                                                                                                                                                                                                                                                                                                                                                                                                                        |
| ma1     | 1   | MTVVCWSSRLLLLLPPYLLLCVFGPSASHAGRLLVFP . MDGSHWLSMLGVIQQLOQKGHEV                                                                                                                                                                                                                                                                                                                                                                                                                                                     |
|         |     |                                                                                                                                                                                                                                                                                                                                                                                                                                                                                                                     |
| Ugt71g1 | 41  | YITVFCIKFPGMPFADSYIKSVLASQPQIQIDLPEVEPPPQEL <b>LKSP</b> <b>EFYILT</b> <b>FL</b> <b>ESLI</b>                                                                                                                                                                                                                                                                                                                                                                                                                         |
| ma12    | 54  | VVVIPEV . . . . SWQLGKSLNCTV . . KTYSISHTLE . . . . DLD <b>REFKYLSY</b> <b>TQWKTP</b> . E                                                                                                                                                                                                                                                                                                                                                                                                                           |
| ma13    | 56  | VVVIPEV . . . . SWRLGKSLNCTV . . KTYSVSHTLE . . . . DLD <b>REFKYFTY</b> <b>TQWKTP</b> . E                                                                                                                                                                                                                                                                                                                                                                                                                           |
| ma10    | 56  | VVVVPEV . . . . SWQLTKPLNFVV . . KTYAVSHTQE . . . . DLN <b>REFKIF</b> <b>IDAQWKSQQE</b>                                                                                                                                                                                                                                                                                                                                                                                                                             |
| ma11    | 56  | VVVIPEV . . . . SWHLGKSNQFTV . . KTYSVSYTLE . . . . DLS <b>HHFN</b> <b>FAHKQWEN</b> . RE                                                                                                                                                                                                                                                                                                                                                                                                                            |
| ma7     | 57  | MVLVPEV . . . . NLLLGESKYYRR . . KIFSVTYSLE . . . . ELQ <b>TRFR</b> <b>TFGN</b> <b>NHFLPGAS</b>                                                                                                                                                                                                                                                                                                                                                                                                                     |
| ma9     | 57  | VVLVPEV . . . . NLLLGESKYYRR . . KIFSVYSLE . . . . ELQ <b>TRFR</b> <b>TFGR</b> <b>NQFVPGAP</b>                                                                                                                                                                                                                                                                                                                                                                                                                      |
| ma2     | 58  | VVLASEV . . . . TVHIKGEDFFTL . . KTYAFPYTKE . . . . EYQ <b>QEIL</b> <b>SDIEKT</b> <b>FKTQHF</b>                                                                                                                                                                                                                                                                                                                                                                                                                     |
| ma5     | 55  | VVLAPEV . . . . NMRIKEEDFFTF . . KVYAVPYTRQ . . . . EL . <b>EEMMEN</b> <b>LKVFFD</b> <b>TGNY</b>                                                                                                                                                                                                                                                                                                                                                                                                                    |
| ma1     | 60  | VVIAPEA . . . . SIHIKEGSFYTL . . RKFPVPFQKE . . . . NVT <b>ATL</b> <b>VELGR</b> <b>TAFNQDSF</b>                                                                                                                                                                                                                                                                                                                                                                                                                     |
|         |     |                                                                                                                                                                                                                                                                                                                                                                                                                                                                                                                     |
| Ugt71g1 | 101 | <b>PHVKATIKTILSNK</b> . . . . . VVGLVLDFFFCVSMIDVGNEFG                                                                                                                                                                                                                                                                                                                                                                                                                                                              |
| ma12    | 101 | <b>HSIRSFLTGSARG</b> <b>FFEL</b> <b>TF</b> <b>SHCRSLFNDK</b> <b>KLVEYLKQR</b> <b>FFDAVFLDPF</b> <b>DVCG</b> <b>LIVAKYFS</b>                                                                                                                                                                                                                                                                                                                                                                                         |
| ma13    | 103 | <b>QSIRSFMTGSARG</b> <b>FFEL</b> <b>MF</b> <b>SHSRGLFNDK</b> <b>KLVEYLKQR</b> <b>SFDAVFLDPF</b> <b>DVCG</b> <b>LIVAKYLS</b>                                                                                                                                                                                                                                                                                                                                                                                         |
| ma10    | 104 | <b>GGILPLLDSPAKG</b> <b>FFEL</b> <b>L</b> <b>F</b> <b>SHCRSLFNDK</b> <b>KLVEYLKQT</b> <b>SFDAVFLDPF</b> <b>DVCG</b> <b>LT</b> <b>IAKYFS</b>                                                                                                                                                                                                                                                                                                                                                                         |
| ma11    | 103 | <b>VGMFSL</b> <b>LKHSGK</b> <b>GFQ</b> <b>VL</b> <b>F</b> <b>SHCRSLFNDK</b> <b>KLVEYLKQR</b> <b>SFDAVFLDPF</b> <b>DVCG</b> <b>L</b> <b>T</b> <b>IAKYFS</b>                                                                                                                                                                                                                                                                                                                                                          |
| ma7     | 105 | <b>LMGPLREYRN</b> <b>NMI</b> <b>V</b> <b>D</b> <b>M</b> <b>F</b> <b>S</b> <b>N</b> <b>C</b> <b>Q</b> <b>S</b> <b>L</b> <b>L</b> <b>K</b> <b>D</b> <b>S</b> <b>A</b> <b>T</b> <b>L</b> <b>S</b> <b>F</b> <b>L</b> <b>R</b> <b>E</b> <b>N</b> <b>K</b> <b>F</b> <b>D</b> <b>A</b> <b>L</b> <b>F</b> <b>T</b> <b>D</b> <b>P</b> <b>A</b> <b>M</b> <b>P</b> <b>C</b> <b>G</b> <b>V</b> <b>I</b> <b>L</b> <b>A</b> <b>E</b> <b>Y</b> <b>L</b> <b>N</b>                                                                   |
| ma9     | 105 | <b>LMGPLREYR</b> <b>N</b> <b>S</b> <b>M</b> <b>L</b> <b>T</b> <b>L</b> <b>E</b> <b>M</b> <b>F</b> <b>S</b> <b>N</b> <b>C</b> <b>Q</b> <b>S</b> <b>L</b> <b>L</b> <b>K</b> <b>D</b> <b>S</b> <b>A</b> <b>T</b> <b>L</b> <b>S</b> <b>F</b> <b>L</b> <b>R</b> <b>E</b> <b>N</b> <b>K</b> <b>F</b> <b>D</b> <b>A</b> <b>L</b> <b>F</b> <b>T</b> <b>D</b> <b>P</b> <b>A</b> <b>M</b> <b>P</b> <b>C</b> <b>G</b> <b>V</b> <b>I</b> <b>L</b> <b>A</b> <b>E</b> <b>Y</b> <b>L</b> <b>N</b>                                  |
| ma2     | 106 | <b>VKAFFET</b> <b>TASIR</b> <b>N</b> <b>F</b> <b>D</b> <b>L</b> <b>Y</b> <b>S</b> <b>N</b> <b>S</b> <b>C</b> <b>I</b> <b>A</b> <b>L</b> <b>L</b> <b>H</b> <b>N</b> <b>K</b> <b>M</b> <b>L</b> <b>I</b> <b>Q</b> <b>L</b> <b>N</b> <b>S</b> <b>S</b> <b>F</b> <b>D</b> <b>V</b> <b>I</b> <b>L</b> <b>T</b> <b>D</b> <b>P</b> <b>I</b> <b>F</b> <b>P</b> <b>C</b> <b>G</b> <b>A</b> <b>V</b> <b>L</b> <b>A</b> <b>K</b> <b>Y</b> <b>L</b> <b>Q</b>                                                                    |
| ma5     | 102 | <b>MKKIF</b> <b>KT</b> <b>SEAL</b> <b>R</b> <b>N</b> <b>M</b> <b>S</b> <b>T</b> <b>V</b> <b>L</b> <b>L</b> <b>K</b> <b>T</b> <b>C</b> <b>T</b> <b>N</b> <b>I</b> <b>L</b> <b>H</b> <b>N</b> <b>E</b> <b>S</b> <b>L</b> <b>L</b> <b>H</b> <b>L</b> <b>N</b> <b>S</b> <b>S</b> <b>F</b> <b>D</b> <b>V</b> <b>V</b> <b>F</b> <b>T</b> <b>D</b> <b>P</b> <b>V</b> <b>F</b> <b>P</b> <b>C</b> <b>G</b> <b>A</b> <b>L</b> <b>L</b> <b>A</b> <b>K</b> <b>Y</b> <b>L</b> <b>G</b>                                           |
| ma1     | 108 | <b>LLRVV</b> <b>KI</b> <b>Y</b> <b>M</b> <b>K</b> <b>V</b> <b>K</b> <b>R</b> <b>D</b> <b>S</b> <b>S</b> <b>M</b> <b>L</b> <b>L</b> <b>A</b> <b>G</b> <b>C</b> <b>S</b> <b>H</b> <b>L</b> <b>L</b> <b>H</b> <b>N</b> <b>A</b> <b>E</b> <b>F</b> <b>M</b> <b>A</b> <b>S</b> <b>L</b> <b>E</b> <b>E</b> <b>S</b> <b>H</b> <b>F</b> <b>D</b> <b>A</b> <b>L</b> <b>L</b> <b>T</b> <b>D</b> <b>P</b> <b>F</b> <b>L</b> <b>P</b> <b>C</b> <b>G</b> <b>S</b> <b>I</b> <b>V</b> <b>A</b> <b>Q</b> <b>Y</b> <b>L</b> <b>T</b> |
|         |     |                                                                                                                                                                                                                                                                                                                                                                                                                                                                                                                     |
| Ugt71g1 | 136 | IPSYLFLT <b>SN</b> <b>V</b> <b>G</b> <b>F</b> <b>L</b> <b>S</b> <b>L</b> <b>M</b> <b>L</b> <b>S</b> <b>L</b> <b>K</b> <b>N</b> <b>R</b> <b>Q</b> <b>I</b> <b>E</b> <b>E</b> <b>V</b> <b>F</b> <b>D</b> <b>D</b> <b>S</b> <b>D</b> <b>R</b> <b>D</b> <b>H</b> <b>Q</b> <b>L</b> <b>L</b> <b>N</b> <b>I</b> <b>P</b> <b>G</b> <b>I</b> <b>S</b> <b>N</b> <b>Q</b> <b>V</b> <b>P</b> <b>S</b> <b>N</b> <b>V</b> <b>L</b> <b>P</b> <b>D</b> <b>A</b> <b>C</b> <b>F</b> <b>N</b> <b>K</b>                                |
| ma12    | 161 | LPSVIFAR <b>G</b> <b>V</b> <b>F</b> <b>C</b> <b>D</b> <b>Y</b> <b>L</b> <b>E</b> <b>E</b> <b>G</b> <b>A</b> <b>Q</b> <b>C</b> <b>P</b> <b>S</b> <b>L</b> <b>S</b> <b>V</b> <b>P</b> <b>R</b> <b>L</b> <b>F</b> <b>S</b> <b>K</b> <b>Y</b> <b>T</b> <b>D</b> <b>T</b> <b>M</b> <b>T</b> <b>F</b> <b>K</b> <b>E</b> <b>R</b> <b>V</b> <b>N</b> <b>H</b> <b>L</b> <b>I</b> <b>Y</b> <b>I</b> <b>E</b> <b>H</b> <b>A</b> <b>F</b> <b>C</b> <b>S</b> <b>Y</b>                                                            |
| ma13    | 163 | LPSVIFAR <b>L</b> <b>S</b> <b>F</b> <b>C</b> <b>Y</b> <b>L</b> <b>E</b> <b>E</b> <b>G</b> <b>A</b> <b>Q</b> <b>C</b> <b>P</b> <b>S</b> <b>L</b> <b>S</b> <b>V</b> <b>P</b> <b>R</b> <b>L</b> <b>F</b> <b>S</b> <b>K</b> <b>Y</b> <b>T</b> <b>D</b> <b>T</b> <b>M</b> <b>T</b> <b>F</b> <b>K</b> <b>E</b> <b>R</b> <b>V</b> <b>N</b> <b>H</b> <b>Y</b> <b>M</b> <b>Y</b> <b>I</b> <b>E</b> <b>D</b> <b>V</b> <b>F</b> <b>C</b> <b>P</b> <b>Y</b>                                                                     |
| ma10    | 164 | LPSVVF <b>S</b> <b>R</b> <b>G</b> <b>I</b> <b>F</b> <b>C</b> <b>H</b> <b>Y</b> <b>L</b> <b>E</b> <b>D</b> <b>A</b> <b>A</b> <b>Q</b> <b>C</b> <b>P</b> <b>S</b> <b>P</b> <b>S</b> <b>Y</b> <b>I</b> <b>P</b> <b>R</b> <b>M</b> <b>L</b> <b>L</b> <b>K</b> <b>F</b> <b>T</b> <b>D</b> <b>T</b> <b>M</b> <b>T</b> <b>F</b> <b>K</b> <b>E</b> <b>R</b> <b>T</b> <b>R</b> <b>N</b> <b>L</b> <b>A</b> <b>Y</b> <b>M</b> <b>G</b> <b>E</b> <b>R</b> <b>A</b> <b>F</b> <b>C</b> <b>H</b> <b>K</b>                          |
| ma11    | 163 | LPSVVF <b>S</b> <b>G</b> <b>I</b> <b>F</b> <b>C</b> <b>H</b> <b>Y</b> <b>L</b> <b>D</b> <b>E</b> <b>G</b> <b>A</b> <b>Q</b> <b>C</b> <b>P</b> <b>S</b> <b>P</b> <b>S</b> <b>Y</b> <b>V</b> <b>P</b> <b>R</b> <b>I</b> <b>L</b> <b>S</b> <b>K</b> <b>F</b> <b>A</b> <b>D</b> <b>T</b> <b>M</b> <b>T</b> <b>F</b> <b>K</b> <b>E</b> <b>R</b> <b>V</b> <b>N</b> <b>Y</b> <b>F</b> <b>S</b> <b>Y</b> <b>M</b> <b>K</b> <b>E</b> <b>R</b> <b>A</b> <b>F</b> <b>C</b> <b>P</b> <b>Y</b>                                   |
| ma7     | 165 | LPSVYLFR <b>G</b> <b>F</b> <b>P</b> <b>C</b> <b>S</b> <b>L</b> <b>E</b> <b>H</b> <b>M</b> <b>L</b> <b>G</b> <b>Q</b> <b>S</b> <b>P</b> <b>S</b> <b>P</b> <b>V</b> <b>S</b> <b>V</b> <b>P</b> <b>R</b> <b>F</b> <b>Y</b> <b>T</b> <b>K</b> <b>F</b> <b>S</b> <b>D</b> <b>H</b> <b>M</b> <b>T</b> <b>F</b> <b>P</b> <b>Q</b> <b>R</b> <b>L</b> <b>A</b> <b>N</b> <b>F</b> <b>I</b> <b>V</b> <b>N</b> <b>I</b> <b>L</b> <b>E</b> <b>N</b> <b>Y</b> <b>L</b> <b>Y</b> <b>C</b>                                          |
| ma9     | 165 | LPSVYLFR <b>G</b> <b>F</b> <b>P</b> <b>C</b> <b>S</b> <b>L</b> <b>E</b> <b>H</b> <b>M</b> <b>L</b> <b>G</b> <b>Q</b> <b>S</b> <b>P</b> <b>S</b> <b>P</b> <b>V</b> <b>S</b> <b>V</b> <b>P</b> <b>R</b> <b>F</b> <b>Y</b> <b>T</b> <b>K</b> <b>F</b> <b>S</b> <b>D</b> <b>H</b> <b>M</b> <b>T</b> <b>F</b> <b>P</b> <b>Q</b> <b>R</b> <b>L</b> <b>A</b> <b>N</b> <b>F</b> <b>I</b> <b>V</b> <b>N</b> <b>I</b> <b>L</b> <b>E</b> <b>N</b> <b>Y</b> <b>L</b> <b>Y</b> <b>C</b>                                          |
| ma2     | 166 | IPAVFILR <b>S</b> <b>L</b> <b>S</b> <b>C</b> <b>G</b> <b>I</b> <b>E</b> <b>Y</b> <b>E</b> <b>A</b> <b>T</b> <b>Q</b> <b>C</b> <b>P</b> <b>N</b> <b>P</b> <b>S</b> <b>S</b> <b>Y</b> <b>I</b> <b>P</b> <b>N</b> <b>L</b> <b>L</b> <b>T</b> <b>R</b> <b>L</b> <b>S</b> <b>D</b> <b>H</b> <b>M</b> <b>D</b> <b>F</b> <b>L</b> <b>Q</b> <b>R</b> <b>V</b> <b>Q</b> <b>N</b> <b>M</b> <b>L</b> <b>Y</b> <b>L</b> <b>V</b> <b>L</b> <b>K</b> <b>Y</b> <b>I</b> <b>C</b> <b>R</b> <b>L</b>                                 |
| ma5     | 162 | IPAVFFLR <b>Y</b> <b>I</b> <b>P</b> <b>C</b> <b>G</b> <b>I</b> <b>E</b> <b>Y</b> <b>E</b> <b>A</b> <b>T</b> <b>Q</b> <b>C</b> <b>P</b> <b>S</b> <b>P</b> <b>S</b> <b>Y</b> <b>I</b> <b>P</b> <b>N</b> <b>L</b> <b>F</b> <b>T</b> <b>R</b> <b>L</b> <b>S</b> <b>D</b> <b>H</b> <b>M</b> <b>D</b> <b>F</b> <b>L</b> <b>Q</b> <b>R</b> <b>V</b> <b>Q</b> <b>N</b> <b>M</b> <b>L</b> <b>Y</b> <b>H</b> <b>L</b> <b>V</b> <b>L</b> <b>K</b> <b>Y</b> <b>I</b> <b>C</b> <b>H</b> <b>L</b>                                 |
| ma1     | 168 | VPTVYFLN <b>K</b> <b>L</b> <b>P</b> <b>C</b> <b>S</b> <b>L</b> <b>D</b> <b>S</b> <b>E</b> <b>A</b> <b>T</b> <b>Q</b> <b>C</b> <b>P</b> <b>V</b> <b>P</b> <b>L</b> <b>S</b> <b>V</b> <b>P</b> <b>K</b> <b>S</b> <b>L</b> <b>S</b> <b>F</b> <b>N</b> <b>S</b> <b>D</b> <b>R</b> <b>M</b> <b>N</b> <b>F</b> <b>L</b> <b>Q</b> <b>R</b> <b>V</b> <b>K</b> <b>N</b> <b>V</b> <b>L</b> <b>A</b> <b>V</b> <b>S</b> <b>E</b> <b>N</b> <b>F</b> <b>M</b> <b>C</b> <b>R</b> <b>V</b>                                          |
|         |     |                                                                                                                                                                                                                                                                                                                                                                                                                                                                                                                     |
| Ugt71g1 | 196 | DGGYIAYYKLAERFRD <b>T</b> <b>K</b> <b>G</b> <b>I</b> <b>V</b> <b>N</b> <b>T</b> <b>F</b> <b>S</b> <b>D</b> <b>L</b> <b>E</b> <b>Q</b> <b>S</b> <b>S</b> <b>I</b> <b>D</b> <b>A</b> <b>L</b> <b>Y</b> <b>D</b> <b>H</b> <b>D</b> <b>E</b> <b>K</b> . I <b>P</b> <b>P</b> <b>I</b> <b>Y</b> <b>A</b> <b>V</b> <b>G</b> <b>P</b> <b>L</b> <b>L</b> <b>D</b> <b>L</b> <b>K</b> <b>G</b> <b>Q</b> <b>P</b> <b>N</b> <b>P</b> <b>K</b>                                                                                    |
| ma12    | 221 | FLRTAVEVASEILQTPVT <b>M</b> <b>T</b> <b>D</b> <b>L</b> <b>F</b> <b>S</b> <b>P</b> <b>V</b> <b>S</b> <b>I</b> <b>W</b> <b>L</b> <b>L</b> <b>R</b> <b>T</b> <b>D</b> <b>F</b> <b>V</b> <b>L</b> <b>E</b> <b>F</b> <b>P</b> <b>R</b> <b>P</b> <b>V</b> <b>M</b> <b>P</b> <b>N</b> <b>M</b> <b>V</b> <b>F</b> <b>I</b> <b>G</b> <b>G</b> <b>I</b> <b>N</b> <b>C</b> <b>L</b> <b>Q</b> <b>K</b> <b>K</b> <b>S</b> <b>L</b> <b>S</b> <b>K</b>                                                                             |
| ma13    | 223 | FFKTAVEIASEVLQTPVT <b>M</b> <b>T</b> <b>D</b> <b>L</b> <b>F</b> <b>S</b> <b>P</b> <b>V</b> <b>S</b> <b>I</b> <b>W</b> <b>L</b> <b>L</b> <b>R</b> <b>T</b> <b>D</b> <b>F</b> <b>V</b> <b>L</b> <b>E</b> <b>F</b> <b>P</b> <b>R</b> <b>P</b> <b>V</b> <b>M</b> <b>P</b> <b>N</b> <b>M</b> <b>V</b> <b>F</b> <b>G</b> <b>G</b> <b>M</b> <b>N</b> <b>C</b> <b>L</b> <b>Q</b> <b>G</b> <b>K</b> <b>P</b> <b>L</b> <b>S</b> <b>K</b>                                                                                      |
| ma10    | 224 | FFKSAADIASEVLQTPVT <b>M</b> <b>T</b> <b>D</b> <b>L</b> <b>F</b> <b>S</b> <b>P</b> <b>V</b> <b>S</b> <b>I</b> <b>W</b> <b>L</b> <b>L</b> <b>R</b> <b>T</b> <b>D</b> <b>F</b> <b>V</b> <b>L</b> <b>E</b> <b>F</b> <b>P</b> <b>R</b> <b>P</b> <b>V</b> <b>M</b> <b>P</b> <b>N</b> <b>V</b> <b>I</b> <b>Y</b> <b>I</b> <b>G</b> <b>G</b> <b>I</b> <b>N</b> <b>C</b> <b>H</b> <b>Q</b> <b>G</b> <b>K</b> <b>P</b> <b>L</b> <b>S</b> <b>K</b>                                                                             |
| ma11    | 223 | FFKTAIEIASEVLQTPVT <b>M</b> <b>T</b> <b>D</b> <b>L</b> <b>F</b> <b>S</b> <b>S</b> <b>V</b> <b>S</b> <b>I</b> <b>M</b> <b>F</b> <b>R</b> <b>T</b> <b>D</b> <b>F</b> <b>V</b> <b>L</b> <b>E</b> <b>F</b> <b>P</b> <b>R</b> <b>P</b> <b>V</b> <b>M</b> <b>P</b> <b>N</b> <b>M</b> <b>V</b> <b>Y</b> <b>I</b> <b>G</b> <b>G</b> <b>I</b> <b>N</b> <b>C</b> <b>H</b> <b>P</b> <b>G</b> <b>K</b> <b>P</b> <b>L</b> <b>S</b> <b>K</b>                                                                                      |
| ma7     | 225 | LYSKYEIIASDLLKRDVSLPSL <b>H</b> <b>Q</b> <b>N</b> . SLWLLRYDFVFEYPRP <b>V</b> <b>M</b> <b>P</b> <b>N</b> <b>M</b> <b>I</b> <b>F</b> <b>L</b> <b>G</b> <b>G</b> <b>I</b> <b>N</b> <b>C</b> <b>K</b> <b>K</b> <b>G</b> <b>K</b> <b>L</b> <b>T</b> <b>Q</b>                                                                                                                                                                                                                                                            |
| ma9     | 225 | LYSKYEIIIVTDLKRDVSLPSL <b>H</b> <b>Q</b> <b>N</b> . SLWLLRYDFVFEYPRP <b>I</b> <b>M</b> <b>P</b> <b>N</b> <b>M</b> <b>I</b> <b>F</b> <b>I</b> <b>G</b> <b>G</b> <b>I</b> <b>N</b> <b>C</b> <b>K</b> <b>K</b> <b>G</b> <b>K</b> <b>L</b> <b>T</b> <b>Q</b>                                                                                                                                                                                                                                                            |
| ma2     | 226 | SITPYESLASELLQREVS <b>L</b> <b>E</b> <b>V</b> <b>L</b> <b>S</b> <b>H</b> <b>A</b> <b>S</b> <b>V</b> <b>W</b> <b>L</b> <b>F</b> <b>R</b> <b>G</b> <b>D</b> <b>F</b> <b>V</b> <b>L</b> <b>D</b> <b>Y</b> <b>P</b> <b>R</b> <b>P</b> <b>I</b> <b>M</b> <b>P</b> <b>N</b> <b>M</b> <b>V</b> <b>F</b> <b>I</b> <b>G</b> <b>G</b> <b>I</b> <b>N</b> <b>C</b> <b>V</b> <b>T</b> <b>K</b> <b>P</b> <b>L</b> <b>S</b> <b>Q</b>                                                                                               |
| ma5     | 222 | LITPYESLASELFQREVS <b>S</b> <b>V</b> <b>E</b> <b>L</b> <b>F</b> <b>S</b> <b>Y</b> <b>A</b> <b>S</b> <b>V</b> <b>W</b> <b>L</b> <b>F</b> <b>R</b> <b>G</b> <b>D</b> <b>F</b> <b>V</b> <b>L</b> <b>D</b> <b>Y</b> <b>P</b> <b>R</b> <b>P</b> <b>I</b> <b>M</b> <b>P</b> <b>N</b> <b>M</b> <b>V</b> <b>F</b> <b>I</b> <b>G</b> <b>G</b> <b>I</b> <b>N</b> <b>C</b> <b>V</b> <b>T</b> <b>K</b> <b>P</b> <b>L</b> <b>S</b> <b>Q</b>                                                                                      |
| ma1     | 228 | VYSPYGLATEILQKEV <b>T</b> <b>V</b> <b>Q</b> <b>D</b> <b>L</b> <b>L</b> <b>S</b> <b>P</b> <b>A</b> <b>S</b> <b>I</b> <b>W</b> <b>L</b> <b>M</b> <b>R</b> <b>S</b> <b>D</b> <b>F</b> <b>V</b> <b>K</b> <b>D</b> <b>Y</b> <b>P</b> <b>R</b> <b>P</b> <b>I</b> <b>M</b> <b>P</b> <b>N</b> <b>M</b> <b>V</b> <b>F</b> <b>I</b> <b>G</b> <b>G</b> <b>I</b> <b>N</b> <b>C</b> <b>L</b> <b>Q</b> <b>K</b> <b>K</b> <b>P</b> <b>L</b> <b>S</b> <b>Q</b>                                                                      |
