# Supplementary material for: Adaptive evolution of multiple-variable exons and structural diversity of drug-metabolizing enzymes
Source: PubMed Central journal article supplement (PMC1885805; doi:10.1186/1471-2148-7-69), 2007-05-02
Supplement: 1471-2148-7-69-S23.pdf [file 1471-2148-7-69-S23.pdf]

Additional file 23. Alignment of the rat (r) UGT1 variable sequences with those of the UGT71G1

```

Ugt71g1      1          MSMSDINKNSELIFIPAPGIGHLASALEFAKLLTNHDKNL
ra8          1 ~~~~MAPADIPASLPLGLCLLLASGFHAGKLLVVP.MDGSHWFTMQMVVEKLLPKGHEV
ra9          1 ~~~~MAPSGCPPSLPLCVCLFLASGFAQAGRLLVVP.MDGSHWFTMQMIVEKLLSHRGHEV
ra11         1 ~~~~MAPSGCPPSSLPLCVCLFLASGFAQAGRLLVVP.MDGSHWFTRQMTVEKLLQRGHEV
ra1          1 MSVVCRSSCSLLLLPCLLLCVLGPASASHAGKLLVIP.IDGSHWLSMLGVIQQLQKQKHEV
ra2          1 ~MDTGLCAPLRGLSGLLLLLCALPWAEGGKVLVFP.MEGSHWLSMRDVVRELHARGHQA
ra6          1 ~~~~MGLHVTLQGLAGLLLLLYALPWAEGGKVLVFP.MEGSHWLSMRDVVRELHARGHQA
ra4          1 ~~~~MGIQGFLOKLSGLLLLLCALPWAEGGKVLVFP.MEGSHWLSMRDVVRELHARGHQA
ra7          1 ~~~~MACLLPAARLPAGFLFLVLWGSVLGDKLLVVP.QDGSWLSMKEIVEHLSERGHDI

Ugt71g1     41 YITVFCIKFPGMPFADSYIKSVLASQPQIQIDLPEVEPPPQELLKSPEFYILTFLESLI
ra8          56 VVVVPEV.....SWQLGKPLNFTV..KTYSVSHTQE.....DLNREFKFFIDSQWKTQQE
ra9          56 VVVIPEV.....SWHMGKSLNFTV..KTYSVSYLE.....DLNYHFKFFAHNQWKT.QE
ra11         56 GVVIPEE.....SWQLGKLVNCTV..KTYSIPYVE.....DMDREFKHFSYTQWKTP.E
ra1          60 VVIAPEA.....SIHIKEGSFYTM..RKYPVPFQNE.....NVTAAFVELGRSVFDQDPF
ra2          58 VVLAPEV.....TVHMKGEDFFTL..QTYAFPYKE.....EYQREILGNAKGFEPQHF
ra6          56 VVLAPEV.....TVHIKEEDFFTL..QTYVPYTRQ.....GFRQQMMRNIKVVFETGNY
ra4          56 VVLAPEV.....TVHIKEEDFFTL..QTYVPYTRQ.....EYRHLLGHLQNFFETEFS
ra7          56 VVLVPEV.....NLLLGESKYR..KSFVPYNLE.....ELRTRYRSFGNNHFAASSP

Ugt71g1     101 PHVKATIKTILSNK.....VVGLVLDFFCVSMIDVGNEFG
ra8          104 GGVLPLLTSPAQGFFELLFSHCRSLFKDKKLVEYLKQSSFDVFLDPFDVCGLTVAKYFS
ra9          103 VGMFSLLKHSGKGFFELLFSHCRSLFKDKKLVEYLKQSSFDVFLDPFDVCGLLILAKYFS
ra11         103 QSMYSLITGSVKDFLEITFSHCRSLFKDKKLVEYLKQSSFDVFLDPFHVCGLTVAKYLS
ra1          108 LLRVVKTYNKVKRDSSMLLSGCSHLLHNAEFMASLEQSHFDALLTDPFPCGSIVAQYLS
ra2          106 VKTFFETMASIKKFFDLYANSCAALLHNKTLIQLNSSSFDVVLTDPVPFCGALLAKYLQ
ra6          104 VKTFLETSEILKNISTVLLRSCMLLHNGSLLQHLNSSSFDMVLTDPVIPCGAVLAKYLG
ra4          104 LKLVLQRMAAVNNVSTFYVRSCRGLLHNTALIQSLNSSSFDVVLTDPFFPCGAVLAMYLR
ra7          104 LMAPLREYRNNMIVIDMCFFSCQSLLKDSATLSFLRENQFDALFTDPAMPCGVILAEYLK

Ugt71g1     136 IPSYLFLTSNVGFSLLMLSLKNRQIEEVFDSDRDHQLLNIPGISNQVPSNVLPDACFNK
ra8          164 LPSVVFSRGIFCHYLEEGSQCPSPSYVPRGILKLTDTMTFKERVNLLSYMGEHAFCPS
ra9          163 LPSVVFSGGIFCHYLDEGAQCPSPSYVPRILSKFTDTMTFKERVNHLSYMKERAFCPY
ra11         163 LPSIIFAKDIFCDNLKEGAQCPSLPSYVPRLFSKSADTMSFKERLWNHLIYFEERAFCSY
ra1          168 LPAVYFLNALPCSLDLEATQCPAPLSYVPKSLSSNTDRMNFLQRVKNMIALTENFLCRV
ra2          166 IPAVFFLRSVPCGIDYEATQCPKPSSYIPNLLTMLSDHMTFLQRVKNMLYPLTLKYICHL
ra6          164 IPTVFFLRYIPCGIDSEATQCPKPSSYIPNLLTMLSDHMTFLQRVKNMLYPLALKYICHF
ra4          164 VPAVFFLQSMLCELEFEATNSPNPSSYIPRLLTLNSDHMSFLDRVKNMLYPVPWMYLCHV
ra7          164 LPSVYLFRGFPCSLEHMLGQSPSVYVPRFYTKFSDHMTFPQRLANFIANILENYLYHC

Ugt71g1     196 DGGYIAYYKLAERFRDTKGIIVNTFSDLEQSSIDALYDHDEK.IPPIYAVGPLLDLKGQPNPK
ra8          224 FFKTATDIASEVLQTPVTMTDLFSPVSVWLLRTDFTLELPRPVMPNVIHIGGINCHQRKPLSK
ra9          223 FFKTAVEIASEVLQTPVTMRDLFSPVSIWMFRTDFVLEFPRPVMPNMVYIGGINCHQGKPLSK
ra11         223 YLKTAIEIASEVLQTPVTLTDLYSPVSIWLLRTDFVFNFPRPVMPNMVFVGGINCFQRKPLSK
ra1          228 VYSPYGSLATEILQKEVTVKDLLSPASIWLMRNDFVKDYPRPIMPNMVFIGGINCLQKKALSQ
ra2          226 SITPYESLASELLQREMSLVEVLSHASVWLFRGDFVFDYPRPIMPNMVFIGGINCVIKKPLSQ
ra6          224 SFTRYESLASELLQREVSLVEVLSHASVWLFRGDFVFDYPRPVMPNMVFIGGINCVIKKPLSQ
ra4          224 NYGSLARLASDLLQREVSVEILRHASVWLLRKDFVFYPRPFMPNMVFIGGINCANRKPLSQ
ra7          224 LYSKYEILASDLLKRDVSLPALHQN.SLWLLRYDFVFEYPRPVMPNMIFIGGTNCKKKGNLSQ

```
