# Supplementary material for: Adaptive evolution of multiple-variable exons and structural diversity of drug-metabolizing enzymes
Source: PubMed Central journal article supplement (PMC1885805; doi:10.1186/1471-2148-7-69), 2007-05-02
Supplement: 1471-2148-7-69-S24.pdf [file 1471-2148-7-69-S24.pdf]

Additional file 24. Alignment of the chicken (*Gallus gallus* [gg]) UGT1 variable sequences with those of the UGT71G1

```

Ugt71g1      1          MSMSDINKNSELI F I P A P G I G H L A S A L E F A K L L T N H D K N L Y
gga10       1 MTLRL.CYPLAAWIFILLV...PGLSEGGKLLVVP.MIGSHWLSMKEVVQKLAERGHEVV
gga14       1 MTLRL.CCPLAAWIFILLV...PGLSEGGKLLVVP.MIGSHWLSMKEVVQKLAERGHEVV
gga11       1 MTLRL.CYPLAAWIFILLV...PGLSEGGKLLVVP.MVGSWLSMKEVVQKLAERGHEVV
gga13       1 MTLRL.CYPLAAWIFILLV...PGLSEGGKLLVVP.VVGSWLSMKEVVQKLAERGHEVV
gga12       1 MTLQL.CYPLAAWIFILLV...PGLSEGGKLLVVP.MVGSWLSMKEVVQKLAERGHEVV
gga5        1 MALVLP SHPQVS.VSLLLLLSVLGLAAGGKLLVVP.IDGSHWLSMREVLDELRLQKGHEIV
gga6        1 MALVLP SHPQVL.VSLLLLLSVLGLAAGGKLLVVP.VDGSWLSMREVL DGLRQKGHEIV
gga1        1 MALVLP SHPQVS.VSLLLLLSVL SLAAGGKLLVVS.VDGSFWFSVLEMLEVLKQKGHEIV
gga7        1 MALVLP SHPQVS.VSLLLLLSVL SLAAGGKLLVVP.VVGSWLSMREVL DGLRQKGHEIV
gga3        1 MALVLP SHPQVS.VSLLLLLSVL SLAAGGKLLVVS.VDGSFWFSVLEMLEVLKQKGHEIV
gga4        1 ~MASSHGPFHFLASWAVILLLLRFSEGGKLLVIP.IDGSHWLSMRLVVEQLRHRGHEIV
gga8        1 ~MDSFSPCNMLMAVLLPFLCYLNTAAAGKLLVIP.MDGSWLSMKEVLAELSSRGHEIV
gga9        1 .MALLFLCFYPRGTGIFLLSSLI FAECGKILVIP.QDGSWLSMQPVVVKLQNGHDVV

Ugt71g1     42 ITVFCIKFPGMPFADSYIKSVLASQPQIQILIDLPEVEPPPQELLKSP EFYILTFLES LIP
gga10      56 VLKPEV...SWNTGDKHNHAYTVKTYPVSTKLE...ELDNAFKVYVATHLKGLPFP
gga14      56 VLKPEV...SWNTGDKHNHAYTVKTYPVSTKLE...DLDNAFKVYVATHLKSMPPFP
gga11      56 VLKPEV...SWQMGETQKHAYTVKTYPVSTKLE...ELDNAFKAYVATHLKSLPFP
gga13      56 VLKPEV...SWQMGETQKHAYTVKTYPVSTKLE...ELDNAFKVYVATHLKSMPPFP
gga12      56 VLKPEV...SWQMGETQKHAYTVKTYPVSTKLE...ELDNAFKLFLDPFLKDL PFP
gga5       59 VVAPEV...SLYIKPSENFIM..KMYPVPFTQE...EVDGMFRRTQQDAFMEGSFL
gga6       59 VVAPEV...NVHIKPTQNFVM..KMYPVPFTQE...EMDSSFREFSQDVFAEGSFL
gga1       59 VVAPEA...NLVKPSESFIL..KTYPASFTQE...EMDDNFQAFLKDAFEEGSFL
gga7       59 IVSPEF...NLVKPSPNNFTM..KLYQVPVTEE...EINGDFQAFLKEAFEEGSFL
gga3       59 VVAPEA...NLVKPSESFIL..KTYPASSKQK...GMAGNLQLFLQEALEEGSFL
gga4       59 VVAPEI...NLRIGASMHYSM..KTYSVSYTRE...FVEAEFKKLGYKSFTPTQFL
gga8       58 VVAPDS...SILIDSSGNYTM..KTYVPVYKQE...EMEELLHTIGTTFSFEPFL
gga9       59 VVVPSS...SLFFMKSKEHQNYTVKVVYRIPYEE...HLHLVLKSFVNDHFTEQSL

Ugt71g1     102 HVKATIKTILSNK...VVGLVLDFCVSMIDVGNEFGI
gga10      106 LYALALNISTYLFESFYAQCKELFSSTETLQYLNQSSFDAVLTDPLFMCGATVANYLSL
gga14      106 KNVIALHNIFTYLFESFYAQCKELFSSTETLQYLNQSGFDAVLTDPIFMCGATVANYLSL
gga11      106 LNVLALYNISSNAFTFLQCKELFSSTETLQYLNQSGFDAVLTDPIFMCGATLANYFSL
gga13      106 LNVLALYNVSVGVFHTFLQCKELFSSTETLQYLNQSGFDAILTDPVLMCGATVANYLSL
gga12      106 ENIIAPYKNGIHLFKTFYLECRELFSSTETLHYLNQSSFDAILTDPFFMCGATVANYLSL
gga5       107 ERFIKAYQGVKNSSAMFLSTCEQLLYNKELIRYLQENKFDAVFTDPILPCGQILAEHLSV
gga6       107 EKLATIRQRMSAIFLSTCEHLLYNKELIRYLQEYEFDALFTDPFFPCGQILAEHLSI
gga1       107 EQFHRLQEKVKRLFDVGFISCAWLLKNKELIRYLESNFDALFTDPVFPCGAILAEHLSI
gga7       107 ERFLRVRERVKKLYELGFIACEQLLKNKELIRYLESNFDALFTDPVLPCGAIVAEHLSI
gga3       107 GRFFRVRENMKNLSASAVIDCENLLYNKELIKYLESKFDALLTDPILSCGAILAEYLSI
gga4       107 EKF...SKITINITMFDSCKRLLSNKELMKYLESMFDGVLMDPFFPCGQIVAEHLSI
gga8       106 TRLLDTWEHFRKTSAMFQAACSLLYKELMKFMESKFDAVFTDPLTPCGQIVALHLSI
gga9       109 NIIITMYQNIIEISRFFFTTCESLLHNKEMMQYLRKSKFDVVFTDPILMCGPILADYLSV

Ugt71g1     137 PSYLFLTSNVGFLSLMLSLKNRQIEEVFDSDRDHQLLNIPGISNQVPSNVLPDACFNKD
gga10      166 PFVFFMRGLPCNLHFEAAQCPSPLSYVPRTFSFSDHMTFFQRVENTLISFLELFYCYGY
gga14      166 PFVFFMRGLPCNLHFEAAQCPSPLSYVPRTFSFNSDHMTFFQRVENTLISFLELFYCNAI
gga11      166 PFVFFMRGLPCNLHFEAAQCPSPLSYVPRTFSFSDHMTFFQRVENTLISFLELFYCNGY
gga13      166 PFVIFMRGFPCNLHYEATQCPSPLSYVPRLFSFNSDHMTFFQRVENALISFLELFYCDS
gga12      166 PFVFFMRGFPCNLHYEAAQCPSPLSYIPRATSLNSDHMTFFQRVLNTLISLLEQFHCNAI
gga5       167 PSVFLQQIPCGLEFEATQCPNPSYIPRIFTDNTDHMNFLQRVENVIFSISNFLCDVV
gga6       167 PSVFLLQIPCGLDIDATQCPNPSYVPRIFSGNSDHMNFLQRVKNIIFDIPHSILCHLL
gga1       167 PSVYFMRGMPCGLDFEATQCPNPSYIPRAFTDHTDHMNFLQRVKNVIFDTSNLFLCDFI
gga7       167 PSVYLLRGIPCGLHLEATQCPSPSYIPRLFTDHTDHMNFLQRVKNVIFDTSNLFLCDFL
gga3       167 PSVYFMRLIPCGFDSEASQCPSPSYIPRAFSDLTDHMNFLQRVKNVIFDTSNLFLCDFL
gga4       163 PSVYLVRGLPCSLDFHATLCPNPSYIPRFFTHYTDRMGFFQRLGNLLVSLSTLTCSFL
gga8       166 PTIFLRGVPCSIDIYAAQSPSPSYVPRLFSYSTDHMTFFQRVKNLLISISEYFTCSTI
gga9       169 PSVYFLRGFPCGMSKATQCPSPSYVPRLFLNNSDSMTFAQRMKNMLVSILELVYCQPL

Ugt71g1     197 GGYIAYKLAERFRDTKGIIVNTFSDLEQSSIDALYDHDEK.IPPIYAVGPLLDLKQPNPK
gga10      226 YQAAIQLSSEVLQRDVTPLDLLNSASISIMRFDFVFEYPRPVMPNMVFGMNCAEKKPLPK
gga14      226 YQDAIKFSSEVLQRDVSLIDLLNSASISIMRFDFVFEYPRPVMPNMVFGMNCAEKKPLPK
gga11      226 YRAAIQLSSEVLQRDVSLIDLLNSAAVSIMRFDFVFEYPRPVMPNMVFGINCAQKKPLPK
gga13      226 YRAAIQLSSEVLQRDVSLIDLLNSASIWLMRYDFVFEYPRPVMPNMVFIGGINCAQKKPLPK
gga12      226 YQDAIKFSSEVLQRDVSLLDLLNSASIWLLRYDFVFEYPRPVMPNMVFIGMNCAQKKPLSK
gga5       227 FQPYAKLSEFLQHDVTVPGLLSKASIWLKLDFVLHYPRLMPNMIMVSGVNCAHKK.LTQ
gga6       227 FQPYTKLSEFLQRDVTVLDLLRKASIWLVRFDFVFHYKPLMPNMIIVGGITCTHKK.LSQ
gga1       227 FKPYEKLSEFLQRDVTVIDLLRKASVLLRYDFVLDYPRLMPNIIVGGINCAHKQ.LPQ
gga7       227 FKPYEKLSEFLQRDVTVLDLLRKASIWLLRYDFVLDYPGLMPNIIVGVNCAHKQ.LPQ
gga3       227 FKPYDKLSEFLQRDVTLLDVFHKASIWLLRYDFVLDYPRLMPNMIIVGVNCAHKQ.LPQ
gga4       223 YSPYDHLIKEFLQEATLLELLSHASIWLMKYDFVFEYPRPVMPNMVLIGGITCTQEKQISK
gga8       226 FSPFERLASDFLQQPMTLTQLLSHGSIWLKRTDFAFDYPMPVMPNMVFIGGINCRKKLLAQ
gga9       229 FTQFELAYEILQKKVTATDLLSHGSVLMRYDFVFEFRPRTMPNMVFIGGINCAQKNLSQ

```
