# Supplementary material for: Adaptive evolution of multiple-variable exons and structural diversity of drug-metabolizing enzymes
Source: PubMed Central journal article supplement (PMC1885805; doi:10.1186/1471-2148-7-69), 2007-05-02
Supplement: 1471-2148-7-69-S25.pdf [file 1471-2148-7-69-S25.pdf]

Additional file 25. Alignment of the zebrafish UGT1 cluster a (z1a) variable sequences with those of the UGT71G1

```

Ugt71g1      1      MSMSDINKNSELIFIPAPGIGHLASALEFAKLLTNHDKNLYIT
z1a2         1      ~~~~~MACLWLLGSLLLLSAEAGKLLVIP.TDGSHWLGLKPIVEELGRRGNQVVVV
z1a4         1      ~~~~~MACLWLLVGLFLLLSAEAGKLLVIP.SDGSHWLGMKPVVEELGRRGNQVVVV
z1a5         1      ~~~~~MASVLLFCFLCLASAKAGKILVVP.SDGSHWMGIKPLVEELGRRGNQVVVV
z1a6         1      ~~~~~MAAFVLLLYLFLCLATAEAGNILLVVP.SDGSHWTGMKPLVEELGRRGNQVVVV
z1a7         1      ~MNDRIVRMAASALVLCFLCLVSAEAGNLLVIP.ALGSHWTGMRPLVEELGRRGNRVVVV
z1a1         1      ~MRTLVPVPAQGLLALLCLFVSFESVQAGKVLVLP.VDGSHWLSMKILVEELSNRGHEMVVL
z1a3         1      MKRTLFPVAPALGLFAFLCLFSSSESVQAGKVLVMP.VDGSHWLSMKILVEEMSSRGHEMVVL

Ugt71g1     44      VFCIKFPGMPFADSIIKSVLASQPQIQLIDLPEVEPPPQELLKSPEFYILTFLE..SLIP
z1a2        52      IPEA.....SLSMGPSSEKTTT..LTYPVNYTKV.....ELEAVLASELNALLSIDVSTDL
z1a4        52      IPEA.....SLSMGPSSEKTTT..LTYPVNYTKA.....ELHMVLEGNLTEILSTDFSTEV
z1a5        51      IPEA.....SLSMGPSQHTTTT..LTYPVPYTKA.....QIQDHISASVTNLISTHVSTDL
z1a6        52      IPEA.....SLSMGPSQHTTTT..LSYPVSYTKA.....QIQEIVKAGVTTLISTYVSTDL
z1a7        59      FPEE.....NVNMVPAKHTTTT..LTYPVPYTKA.....QIQKGTDAAISKLSADVSSDV
z1a1        59      VPET.....SILIKKSGKYST..KTYPVSFTHD.....DLAENL.KEIQNSALEKAPK.L
z1a3        60      VPET.....SILIGKSGNFTTT..KSFRVPYSFD.....ELNAHV.DHIRKTAIEKAPR.F

Ugt71g1     102     HVKATIKTILSN.....KVVGLVLDFFCVSMIDVGNEFGI
z1a2        100     AKFQSFFTLNLVQTFILRNAEGLLFNKDLMKKLQDYNFDAILTDPFEPVGAIAEYLSI
z1a4        100     SKFFVFLQLKVLQNFIVRNAEGLLFNEDLMKKLQDCRFDAILTDPFEPVGVIAEYLSI
z1a5         99     ARFQSFINTMDLLSNLITRNVEGLLLNKDLMKKLQDYNFDVILTDPFETVGVIAEYLSI
z1a6        100     PRFQSFINRMNSLSNIIIRSAEGLFSLNKDLIKKLQDYNFDVILTDPFELVGVIAEYLSV
z1a7        107     GRFQNFFTTMDMLKVIIISRNAEGLLLNKDLLKDLKDYNFDAILTDPFETVGVIAEYLSI
z1a1        105     TDIVVFRNLLQFLTMQSKTCEGLLYNEPLMKSLREMGFDAMLTDPFPCGTIIADSFSI
z1a3        106     IDIVGALGNLIQFTNMQVKACEGLLYDEPLMKSLRDMKFDALLTDPFPCGSVIADYFSI

Ugt71g1     137     PSYLFLTSNVGFLSLMLSLKNRQIEEVFDDSDRDHQLLNIPGISNQVPSNVLPDACFND
z1a2        160     PAIYMQINHPCGVDTLASQCPAPPSYVPQTFTHFTDRMNLWQRSINFVRALLQPKACKLI
z1a4        160     PAIYMQVNLPCGVDSLASQCPSPPSYVPQRLNTHFTDQMNIWQRCINLVRTLLQHMACRYM
z1a5        159     PTIYIQTSHPCGADTLASQCPSPPSYVPQRLTHFSDRMNLWQRSVNFVRTLIQPMACRRM
z1a6        160     PAIYIQTSHPCNVDTLASQCPSPPSYVPHILTHFSDRMNLWQRSVNFIRTLIQPMACRRM
z1a7        167     PAIYMQTSHPCGADVLASQCPAPPSYVPKGLTHFTDRMNLWQRSVNFVRTLVQPVACSRM
z1a1        165     PAVYFLRLIPCRLEAAAQCPSPPSFMPRYSSGFTDKMTFPQRLVNTLLTVVEGFLCRSM
z1a3        166     PAVYFLRGIPCRLEAAAQCPSPPSFIPRFFTGYTDKMTFPQRMINTFMTVFEKYLCHQL

Ugt71g1     197     GGYIAYYKLAERFRDTKGIIIVNTFSDLEQSSIDALYDHDEK.IPPYAVGPLLDLKGQPNPK
z1a2        220     FARADEIASHLLQRKTSMVEIFSRAALWFLRFNFALEFPRPVMPNMVMIGATVNQKPKPLTH
z1a4        220     YAEADEIASRFLQRRASIVEIMNRATLWLMRFDFAFAFEPRPLMPNMVMIGMATKKPLSK
z1a5        219     FTRADEIASRVLQRKTSIMDIMGRAALWFVHSDFALEFPHPLMPNMIIVGGMDNRKAEPLSQ
z1a6        220     FTRADEIASRVLQRKTSIMDIMSHAALWFVHSDFALEFPHPLMPNMIIVGGMDNTKAEPLSQ
z1a7        227     FAHADEIASQVLQKKTSVMEIMSRAALWFMHFDFAFEFPRPVMPNMVIGGVDTKKPEPLSQ
z1a1        225     YESADELASKYLQKETTYAELLGHGAVLLLRYDFAFAFEPRPQMPNMVQIGGINCVKRAPLTK
z1a3        226     FASFDELATRYLKKDTSYAELLGHGAVLLLRYDFSFEYPKQMPNMVQIGGINCAKRAPLTK

```
