# Supplementary material for: Adaptive evolution of multiple-variable exons and structural diversity of drug-metabolizing enzymes
Source: PubMed Central journal article supplement (PMC1885805; doi:10.1186/1471-2148-7-69), 2007-05-02
Supplement: 1471-2148-7-69-S26.pdf [file 1471-2148-7-69-S26.pdf]

Additional file 26. Alignment of the zebrafish UGT1 cluster b (z1b) variable sequences with those of the UGT71G1

|         |     |                                                                             |
|---------|-----|-----------------------------------------------------------------------------|
| Ugt71g1 | 1   | MSMSDINKNSELIFIPAPGIGHLASALEFAKLLTNHDK                                      |
| z1b4    | 1   | MHLGVI . ICLVGVVCSAVVDQKLSRNSSWTGKLLVVP . MDGSHWTGVKAVAEEMGRRGH             |
| z1b5    | 1   | MH . GVI . FNLVGVVCSAAMNQKPSRNSSWTGKLLVVP . MDGSHWTGVKAVAEEMGRRGH           |
| z1b2    | 1   | MRLGVI . FILVGVVCSAAVDQKPSRKSSWTGKLLVVP . MDGSHWTGVKAVAEEMGRRGH             |
| z1b3    | 1   | MHLGVI . FCLVGVVCSAAVDQKLSRKSSWTGKLLVVP . MDGSHWTGVKAVAEEMGRRGH             |
| z1b7    | 1   | ~~MGLVAFIWCIVLTFASAGEAVKSKEASWTGSLLVVP . MDGSHWTGVKALAEEMGRRGH              |
| z1b1    | 1   | ~MLKKGWLWGLGSGLLLLLWLSAGLRPV . . QGGRVLVMP . VEGSHWLSMKVLATELARRGH          |
|         |     |                                                                             |
| Ugt71g1 | 39  | NLYITVFCIKFPGMPFADSYIKSVLASQPQIQILIDLPEVEPPPQELLKSPEFYILTFLS                |
| z1b4    | 59  | TVIVVIPEI . . . . . SMRLGPGKHYIT . . KKFPVQYKQD . . . . . LINQIMVEHVNEVAASE |
| z1b5    | 58  | TVIVVIPEI . . . . . SMRLGPGKHYIT . . KKFPVKYKPD . . . . . VLNQMIAKLVNTLSAPE |
| z1b2    | 59  | TVIVVIPEI . . . . . SVLLGPGQHYIT . . KMFSVKYDQK . . . . . SLNKVLNERVLEVTNPG |
| z1b3    | 59  | TVIVVIPEI . . . . . SMRLGPGKHYIT . . KKFPVKYDQK . . . . . LFNEVLTEHVHEVTNPG |
| z1b7    | 58  | KVTVVIPEV . . . . . SVLLGPGKHYVT . . RTFPVLYGKQ . . . . . QLDELQARNAQVMESKQ |
| z1b1    | 57  | DVLVLVPEK . . . . . NILIQSSELFRT . . ETFPVKISKE . . . . . QLSKSLKGFQQGVFTRS |
|         |     |                                                                             |
| Ugt71g1 | 99  | .LIPHVKATIKTILSN . . . . . KVVGLVLDFFCVSMIDVGN                              |
| z1b4    | 107 | QSLKTVTTSIMYRFGKIIDHFIISTSESLFQEQELIEFLRDQNFDAVLTNPAMPMAILAY                |
| z1b5    | 106 | QSLKRVTSNIYNFGKVVDYFISTTESLQEQELIEFLRDQNFDAVLTDPAMPMAILAY                   |
| z1b2    | 107 | NSFLSTVIRIVSNLRRMFNTMAATSESLFQDKELIEFLRNENFDAVLTDPVLPMAILAY                 |
| z1b3    | 107 | HSRLKTVTSTMANLLKMFNMMASTSESLFQDKELIKFLRDNENFDAILTDPALPMGAVLAY               |
| z1b7    | 106 | LPLMEKISTRFSNMRKFVNLQRATAESLLLNQELVDFLRKQNFDAVLTSPAVPTGAILAY                |
| z1b1    | 105 | .PALMDVVFQLEERLLNFTGSQVEGCESLLYNEPLMRKLKEQNFELMLTDPFLPCGPPIAT               |
|         |     |                                                                             |
| Ugt71g1 | 133 | EFGIPSYLFLTSNVGFLSLMLSLKNRQIEEVFDDSDRDHQLLNIPGISNQVPSNVLPDAC                |
| z1b4    | 167 | NLSVPAVYMLRGIMC . . ESKATACPNPPSYIPRFFTQISDRMTFSERVINTLVSLLEPLM             |
| z1b5    | 166 | NLSVPAVYMLRGLMC . . ESKATACDPSSYIPRLFTQNSDHMNFGERLMNTLASLMEPLM              |
| z1b2    | 167 | NLSVPAVYLLRGMACGLDATATTCPNPSSYIPRFHTRNTDRMSFGERVMNMLMSILEQTV                |
| z1b3    | 167 | NFSVPAVYMLRGMPCALDATATACPNTPSYIPRFHTGNTDRMSFGERVMNVLMSILEQVA                |
| z1b7    | 166 | NLSLPAVYMLRGLPCGLDSVATACPNPPSYIPRFFTHSSDRMSFGQVNLVNLVSMLEPLL                |
| z1b1    | 164 | ALGVPAVYFLRGMPCGIDLLASQCPSPPSYVPRFHSGTSDKMNFFVERIRNFFMSGFELVL               |
|         |     |                                                                             |
| Ugt71g1 | 193 | FNKDGGYIAYYKLAERFRDTKGIIVNTFSDLQSSIDALYDHDEK . IPPITYAVGPLLDDLKGQPNPK       |
| z1b4    | 225 | CRLMLGSFEEMTSKFLHRDVSITEILSTAAVWLMRYDFTLEFPKPLMPNMITIGGINCEVKNPLTK          |
| z1b5    | 224 | CKLKFSAFEEVTSKFLHRDVSMTTEILSTGAVWLMRYDFTLEFPKPLMPNIINIGGINCEVNNPLTK         |
| z1b2    | 227 | CKFMYRSFEEIMIFNFLQRDVSMTTEILRTGAVWLMRYDFTLEFPKPLMPNQFIGGINCGVRNPLTK         |
| z1b3    | 227 | CKVMYWSFEEVTSNFLQRDVSMTTEILSTGAVWLMRYDFTLEFPKPLMPNQFIGGINCGVKNPLMK          |
| z1b7    | 226 | CRLIYWTTEDVASRFMQRDVSVTEVLSSGALWLLRYDFTLEFPKPLMPNMVLIGGINCAIRHPLTK          |
| z1b1    | 224 | CKVMYASFDELAARYLKKDVTYKEIIGRGALWLHRYDFTFEYPRPIMPNMVFIGGINCQKSAEISA          |
