# Supplementary material for: Adaptive evolution of multiple-variable exons and structural diversity of drug-metabolizing enzymes
Source: PubMed Central journal article supplement (PMC1885805; doi:10.1186/1471-2148-7-69), 2007-05-02
Supplement: 1471-2148-7-69-S27.pdf [file 1471-2148-7-69-S27.pdf]

Additional file 27. Alignment of the human (h) UGT2 sequences with those of the UGT71G1

```

Ugt71g1      1      MSMSDINKNSELIFIPAPGIGHLASALEFAKLLTNHDKNLYITVFC
h2a1         1      ~~~MLNNLLLFSLQISLIGTTLGGNVLIWP.MEGSHWLNVKIIIDELIKKEHNVTVLVAS
h2b15        1      MSLKWTSVFLLIQLSCYFSSGSCGKVLVWP.TEYSHWINMKTILEELVQRGHEVTVLTSS
h2b17        1      MSLKWMSVFLMLQLSCYFSSGSCGKVLVWP.TEYSHWINMKTILEELVQRGHEVIVLTSS
h2b11        1      MTLKWTSVLLLLIHLSCYFSSGSCGKVLVWA.AEYSHWMNMKTILKELVQRGHEVTVLASS
h2b28        1      MALKWTSVLLLLIHLGCFYFSSGSCGKVLVWT.GEYSHWMNMKTILKELVQRGHEVTVLASS
h2b10        1      MALKWTTV.LLIQLSFYFSSGSCGKVLVWA.AEYSLWMNMKTILKELVQRGHEVTVLASS
h2b7         1      MSVKWTSVILLIQLSFCFSSGNCGKVLVWA.AEYSHWMNIKTILDELIQRGHEVTVLASS
h2b4         1      MSMKWTSALLLIQLSCYFSSGSCGKVLVWP.TEFSHWMNIKTILDELVQRGHEVTVLASS
h2a3         1      MRSDKSALVFLLLQLFCVGCFCGKVLVWP.CDMSHWLNVKVILEELIVRGHEVTVLTHS

Ugt71g1     47      IKFPGMPFADSYIKSVLASQPQIQILIDLPEVEPPPQELLKSPEFYILTFLESLIPHVKAT
h2a1         57      G.....ALFITPTSNPSLTFEIIYRVFPFGKE.....RIEGVIKDFVLTWLENNRPSPSTIWR
h2b15        60      A.....STLVNASKSSAIKLEVYPTSLTKN.....DLEDSSLKILDRWIYGVSKN.TFWS
h2b17        60      A.....SILVNASKSSAIKLEVYPTSLTKN.....DLEDFFMKMFDRWTYSISKN.TFWS
h2b11        60      A.....SILFDPNDASTLKFEVYPTSLTKT.....EFENIIMQQVKRWS.DIRKD.SFWL
h2b28        60      A.....SILFDPNDAFTLKLEVYPTSLTKT.....EFENIIMQQVKRWS.DIQKD.SFWL
h2b10        59      A.....SILFDPNDSSTLKLEVYPTSLTKT.....EFENIIMQLVKRLS.EIQKD.TFWL
h2b7         60      A.....SILFDPNNSSALKIEIYPTSLTKT.....ELENFIMQQIKRWS.DLPKD.TFWL
h2b4         60      A.....SISFDPNSPSTLKFEVYVPSLTKT.....EFEDIKQLVKRWA.ELPKD.TFWS
h2a3         60      K.....PSLIDYRKPSALKFEVVHMPQDRT.....EENEIFVDLALNVLPLGL....STWQ

Ugt71g1     107     IKTILSN.....KVVGLVLDFFFCVSMIDVGNEFGIP
h2a1         107     FYQEMAKVIKDFHMVSQEICDGVLNKQQLMAKLKKSKEVFLVSDPVFPCGDIVALKLGIP
h2b15        109     YFSQLQELCWEYYDYSNKLCCKDAVLNKKLMMKQLQESKFDVILADALNPCGELLAELFNIP
h2b17        109     YFSQLQELCWEYSDYNIKLCEDAVLNKKLMRKLQESKFDVLLADAVNPCGELLAELLNIP
h2b11        108     YFSQEQEILWELYDIFRNFCKDVVSNKKVMKQLQESRFDIVFADAVFPCGELLAALLNIR
h2b28        108     YFSQEQEILWEFHDIFRNFCKDVVSNKKVMKQLQESRFDIIFADAFFPCGELLAALLNIP
h2b10        107     PFSQEQEILWAINDIIRNFCKDVVSNKKLMKQLQESRFDIVFADAYLPCGELLAELFNIP
h2b7         108     YFSQVQEIMSIFGDITRKFCCKDVVSNKKFMKVKVQESRFDVIFADAIFPCSELLAELFNIP
h2b4         108     YFSQVQEIMWTFNDILRKFCCKDIVSNKKLMKQLQESRFDVVLADAVFPFGELLAELLKIP
h2a3         106     SVIKLNDFFVEIRGTLKMMCESFIYNQTLMKKLQETNYDVMLIDPVIPCGDLMAELLAVP

Ugt71g1     138     SYLFLTSNVGFLSLMLSLK.NRQIEEVFDDSDRDHQLLNIPGISNQVPSNVLPDACFNKD
h2a1         167     FMYSLRFSPASTVEKHCGKVPYPPSYVPAVLSELTDQMSFTDRIRNFISYHLQDYMFETL
h2b15        169     FLYSLRFSVGYTFEKNGGGFLFPPSYVPVVMSELSDQMIFMERIKNMIHMLYFDWFQIY
h2b17        169     FLYSLRFSVGYTFEKNGGGFLFPPSYVPVVMSELSDQMIFMERIKNMIYMLYFDWFQAY
h2b11        168     FVYSLRFTPGYTIERHSGGLIFPPSYIPVMSKLSDQMTFMERVKNMIYVLYFDWFQMS
h2b28        168     FVYSLCFTPGYTIERHSGGLIFPPSYIPVMSKLSDQMTFMERVKNMIYVLYFDWFQMC
h2b10        167     FVYSHSFSPGYSFERHSGGFIFPPSYVPVVMSELSDQMTFMERVKNMLYVLYFDWFQIF
h2b7         168     FVYSLSFSPGYTFEKHSGGFIFPPSYVPVVMSELTDQMTFMERVKNMIYVLYFDWFEIF
h2b4         168     FVYSLRFSPGYAIEKHSGGLFPPSYVPVVMSELSDQMTFIERVKNMIYVLYFEFWFQIF
h2a3         166     FVLTLRISVGGNMERSCGKLPAPLSYVPMTGLTDRMTFLERVKNSMLSVLFHFWIQDY

Ugt71g1     197     .GGYIAYYKLAERFRDTKGIIVNTFSDLEQSSIDALYDHDEK.IPPYAVGPLLDLKGQPNPK
h2a1         227     .WKSWSDSYSKALGRPTTLCETMGKAEIWLIRTYWDFEFPRPYLPNFEVGGLHCKPAKPLPK
h2b15        229     DLKKWDQFYSEVLGRPTTLFETMGKAEMWLIRTYWDFEFPRPFLPNVDFVGGLHCKPAKPLPK
h2b17        229     DLKKWDQFYSEVLGRPTTLFETMGKAEMWLIRTYWDFEFPRPFLPNVDFVGGLHCKPAKPLPK
h2b11        228     DMKKWDQFYSEVLGRPTTLFETMGKADIWLMRNSWSFQFPHPFLPNVDFVGGFHCKPAKPLPK
h2b28        228     DMKKWDQFYSEVLGRPTTLFETMGKADIWLMRNSWSFQFPHPFLPNIDFVGGLHCKPAKPLPK
h2b10        227     NMKKWDQFYSEVLGRPTTLSETMRKADIWLMRNSWNFKFPHPFLPNVDFVGGLHCKPAKPLPK
h2b7         228     DMKKWDQFYSEVLGRPTTLSETMGKADVWLIRNSWNFQFPYPLLPNVDFVGGLHCKPAKPLPK
h2b4         228     DMKKWDQFYSEVLGRPTTLSETMAKADIWLIRNYWDFQFPHPLLPNVEFVGGLHCKPAKPLPK
h2a3         226     DYHFWEEFYSKALGRPTTLCETVGKAEIWLIRTYWDFEFPQPYQPNFEVGGLHCKPAKALPK

```
