# Supplementary material for: Adaptive evolution of multiple-variable exons and structural diversity of drug-metabolizing enzymes
Source: PubMed Central journal article supplement (PMC1885805; doi:10.1186/1471-2148-7-69), 2007-05-02
Supplement: 1471-2148-7-69-S28.pdf [file 1471-2148-7-69-S28.pdf]

Additional file 28. Alignment of the mouse (m) UGT2 sequences with those of the UGT71G1

```

Ugt71g1      1          MSMSDINKNSELIFIPAPGIGHLASALEFAKLLTNHDKNLYITV
m2a1         1  ~~~MLKNIL.LCSLQIS.LLGMSLGGNVLIWP.MEGSHWLVNKKIILDELLRKEHNVTVLV
m2b38        1  ~~MPGKWISALLLLQISCCFRSVKCGKVLVWP.MEFSHWMNIKIILDELVQRGHEVTVLR
m2b5         1  ~~MPGKWISALLLLQISCCFRSVKCGKVLVWP.MEFSHWMNIKIILDELVQRGHEVTVLR
m2b37        1  ~~MPGKWISALLLLQISCCFRSVKCGKVLVWP.MEFSHWMNIKIILDELVQRGHEVTVLR
m2b35        1  ~~MPVKWISALLLLQMSCCFRSTSCGKVLVWP.LEFSHWMNLKIILDELVQRGHEVTVLR
m2b36        1  ~~MLWKWISALLLLQISCCFRSAKCGKVLVWP.VDYSHWMNIKIILDELKQKGHEVTVLR
m2b1         1  ~~MSMKQASVFLLIQFICYIRPGACGKVLVWP.TEYSHWINMKIILDELVQRGHDVTVLI
m2b34        1  MPVKMTAALLLLLLQLSGFFGSGTGGKVLVWP.MEFSHWLNKLTILDELLKKGHEVMVLR
m2a3         1  ~MVSEKCVAAFFLLQL.CWAGCGFCSKVLVWP.CDMSHWLNKLTILEELGARGHEVTVLK

Ugt71g1     45  FCIKFPGMPFADSYIK.SVLASQPQIQLIDLPEVEPPPQELLKSPEFYILTFLESLIPHV
m2a1        55  ASG.....ALFITPSSISPSLTTFEIYPVPGKE.....KIESVIKDFVLTWLENRPSST
m2b38       58  PSA.....YYVLDPKK.SPGLKFETFPTSSVSKD.....NLENFFIKFVDVWTYEMPR.DT
m2b5        58  PSA.....YYVLDPKK.SPGLKFETFPTSSVSKD.....NLENFFIKFVDVWTYEMPR.DT
m2b37       58  PSA.....YYVLDPKK.SPGLKFETFPTSSVTKD.....DLENFFIQLLNVWTYELSR.DT
m2b35       58  PSA.....SIFVDPKY.SPGLKFETFPTAFSKD.....YLETFLTKLVDEWTFEVPR.DT
m2b36       58  PST.....SIFLDPKK.SPGLKFETFPTSSFSND.....VMEIIFAKAVERWTYEVPR.DT
m2b1        58  SSA.....SILIGPSN.ESSINFEIYSAPLSKD.....DLEYAFEKWVGNWTYELKK.LP
m2b34       60  PSA.....SLSYVDN.TSAIEFETYPTSYSLS.....ELEEIFWESLKKYIYELPK.QS
m2a3        58  .YP.....SIIIDQSK.RIPLHFENIPLLYEIE.....TAENRLNEIANLAVNVIPN.LS

Ugt71g1     104 KATIKTILSN.....KVVGLVLDFFCVSMIDVGNEF
m2a1        105 IWTFYKEMAKVIEFHLVSRGICDGVLKNEKLSKLQKEKFEVLLSDPVFPCGDIVALKL
m2b38       106 CLSYSPLLQNMIDEFSDYFSLCKDVVSNKELMTKLQESKFDVLLSDPVASCGELIAELL
m2b5        106 CLSYSPLLQNMIDEFSDYFSLCKDVVSNKELMTKLQESKFDVLLSDPVASCGELIAELL
m2b37       106 CLSYSPLMQNMFDELSGYLSLCKDVVSNRQLMTKLQESKFDVLLSDPVAFGGELIAELL
m2b35       106 CLSYS.LLQTLFGKLSDYLSLCKEAVSNKQLMTKFQESKFDVILSDAIGCGELIAQLL
m2b36       106 CLSYSPLLQNIFDEYSDYCLTLCKDTVSNKQLMAKLQESKFDVILSDAIGCGELIAELL
m2b1        106 FWTSYKLQKISSEYSDMIESFCKAVVWNKSLMKKLQGSKFDVVLADALVPCGELLSELL
m2b34       108 FWGYFLMLQEMVWVDSKYFESLCKDVVFNKELMTKLQKSRFDVILADPFIPCGDLLAEVL
m2a3        105 LWEAATLQDFFLQVTGDFESICRSVLYNQKFMDKLRDAQYDVVVIDPVVPCGELVAEVL

Ugt71g1     135 GIPSYLFLTSNVGFLSLMLSLK.NRQIEEVFDDSDRDHQLLNIPGISNQVPSNVLPDACF
m2a1        165 GIPFIYSLRFSPASTVEKHCGKVPFPSPSYVPAILSELTDQMSFTDRVRNFISYRMQDYMF
m2b38       166 QIPFLYSIRFSPGYQIEKSSGRFLLPPSYVPVILSGLGGQMTFIERVKNMICRLYDFDFWF
m2b5        166 QIPFLYSIRFSPGYQIEKSSGRFLLPPSYVPVILSGLGGQMTFIERIKNMICMLYDFDFWF
m2b37       166 HIPFLYSLRFTAGYRIEKSSGRFLLPPSYVPVILSGLGGQMTFIERVKNMICMLYDFDFWF
m2b35       165 QIPFLYSLRFSPGYQVEKNSGGFVLPSPSYVPVILSGLGGQMTFTERVKNMICMLYDFDFWF
m2b36       166 QIPFLYSLRFSPGYYLEKYSGGLPLPPSYVPVILSGLSGQMTFKERVKNMICMLYDFDFWF
m2b1        166 KTPLVYSLRFCPGYKCEKYSGGLPLPPSYVPVVLSELSDHMTFAERVKNMLQVLLDFDFWF
m2b34       168 KIPLVYSLRFFPGSTYEKYSGGLPLPPSYVPVVMSELSDRMTFMERVRNVIYMLCDFDFWF
m2a3        165 QIPFVYTLRFSMGYMEKHCGQLPIPLSYVPVVMSELTDNMTFTERVKNMMFSLLFEYWL

Ugt71g1     194 NKD.GGYIAIYKLAERFRDTKGIIVNTFSDLEQSSIDALYDHDEK.IPPIYAVGPLLDLKGQPNPK
m2a1        225 ETL.WKQWDSYYTKALGRPTTLCETMGKAEIWLMRTYWDFEFPRPYLPNFEFVGGLHCKPAKPLPK
m2b38       226 QMFNDKKWDSFYSEYLGRPTTLAETMGKAEMWLIRSNWDLEFPHPTLPNVDYVGGLHCKPAKPLPK
m2b5        226 QMFNDKKWDSFYSEYLGRPTTLVETMGQAEMWLIRSNWDLEFPHPTLPNVDYVGGLHCKPAKPLPK
m2b37       226 QMPNDKKWDSFYTEYLGRPTTLAETMGQAEMWLIRSNWDLEFPHPTLPNVDYVGGLHCKPAKPLPK
m2b35       225 QTFTEKEWDQFYSETLGRPTTLIETMGKAEMWIRSYWDLEFPHPTLPNVEYVGGLHCKPAKPLPK
m2b36       226 QTFREKKWDQFYSETLGRPTTLIETMGKAEMWIRSYWDLEFPHPTLPNVYVGGLHCKPAKPLPK
m2b1        226 QTFNEKSWNQFYSDVLGRPTTLTEMMGKADIWLVRTFWDLKFPHPFLPNFDFVGLHCKPAKPLPK
m2b34       228 QTFNEKNWNQLYTEVLGRPTTLSETMAKADIWLIRTYWDLEFPHPVLPNFDFIGLHCRPAKPLPK
m2a3        225 QQYDFAFDQFYSETLGRPTTFCKTVGKADIWLIRTYWDLEFPRPYLPNFEFVGGLHCKPAKPLPK

```
