# Supplementary material for: Adaptive evolution of multiple-variable exons and structural diversity of drug-metabolizing enzymes
Source: PubMed Central journal article supplement (PMC1885805; doi:10.1186/1471-2148-7-69), 2007-05-02
Supplement: 1471-2148-7-69-S29.pdf [file 1471-2148-7-69-S29.pdf]

Additional file 29. Alignment of the rat (r) UGT2 sequences with those of the UGT71G1

```

Ugt71g1      1          MSMSDINKNSELIFIPAPGIGHLASALEFAKLLTNHDKNLYITV
r2a1         1  ~~~MLKNIL.LWSLQLSL.LGMSLGGNVLVWP.MEGSHWLNVKIIIDELLRKEHNVTVLV
r2b3         1  ~~MPGKWISALLLLQISCCFQSGNCGKVLVWP.MEFSHWMMNIKTILDELVQRGHEVTVLK
r2b6         1  ~~MPGKWIFALLLLQISFCLRSACGKVLVWP.MEFSHWMMNIKTILDELVQRGHEVTVLK
r2b2         1  ~~MPRKWISALFLLQISYCFKSGHCGKVLVWP.MDFSHWMMNIKIILDELVQRGHEVTVLK
r2b12        1  ~~MPGKWISALLLLQISFCFKSGNCGKVLVWP.MEYSHWMMNIKIILEELVQKGHEVTVLR
r2b8         1  ~~MPQKWISALLLLQISFCFRSGNCGKVLVWP.LEYSHWMMNLKIILDELVQRGHEVTVLR
r2b34        1  MSVKRTASLLLLLLQLSDFFGSGTGGKVLVWP.MEFSHWLNLRVILDELLKKGHEVTVLR
r2b39        1  MSVKMTAA.LLLLHLTIFFGSGSGGKVLVWP.VEFSHWLNKLIILSELVKKGHEVVVLK
r2b1         1  MSMKQTS.VFLLIQLICFYFRPGACGKVLVWP.TEYSHWINIKIILNELAQRGHEVTVLV
r2a3         1  ~MVSVKWAVAIFFLLQL.CWSGCGICSKVLVWP.CDMSHWLNKLTILEELAARGHEVTVLK

Ugt71g1      45 FCIKFPGMPFADSYIKSVLASQPQIQLIDLPEVEPPPQELLKSPEFYILTFLESLIPHVK
r2a1         55 ASG.....ALFITPSVSPSLTTFEIYVPVFGKE.....KIESVIKDFVLTWLENRSPSTI
r2b3         58 PSA.....YYVLDPKKSPDLKFETFPTSVSKD.....ELENYFIKLVDVWTYELQR.DTC
r2b6         58 PSA.....YYVLDPKKSPDLKFETFPTSVSKD.....ELEKYFIKLVDAWTYELQR.DTC
r2b2         58 PSA.....YFFLDPKKSSDLKFEIFSTSISKD.....ELQNHFIKLLDVWTYELPR.DTC
r2b12        58 PSA.....SVFLDPKETSDLKFVTFPTSFSSH.....DLENFFTRFVNVWTYELPR.DTC
r2b8         58 PSS.....SVFLDPKKASGLVYETFPTTSNND.....EVEKFFTQWVNTWTYDVPK.YTC
r2b34        60 PSA.....SLSYEVDNTSAIEFETYPTSSYSLT.....EVDEFFWESLRKYIYELPK.QSF
r2b39        58 PSV.....SFSYEVDKTSAIEFESFPSSYSIA.....DVEVIFMDCVNESIYELPK.QSF
r2b1         58 SSA.....SILIEPTKESSINFEIYSVPLSKS.....DLEYSFAKWIDEWTRDFET.LSI
r2a3         58 .YP.....SIIIDQSKLTPLQFENIPVLYETE.....VAENHLNEIVNLAVNVIPN.LSL

Ugt71g1      105 ATIKTILSNK.....VVGLVLDFFCVSMIDVGNEFG
r2a1         105 WTFYKEMAKVIEEFHLVSRGICDGVLKNEKLMTKLQRGKFEVLLSDPVFPCGDIVALKLG
r2b3         107 LSYSPLLNQNMIDGFSDYLSLCKDTVSNKQLMAKLQESKFDVLLSDPVAACGELIAEVLH
r2b6         107 LSFSPLLQNMMDEFSDYYLSVCKDAVSNKQLMAKLQESKFDVLLSDPVAACGELIAEVLH
r2b2         107 LSYSPILQNLVYEFSYFYLSICKDAVSNKQLMTKLQESKFDVLFADPVASCGDLIAELLH
r2b12        107 LSYFLYLQDTIDEYSDYCLTVCKEAVSNKQFMTKLQESKFDVVFSDAIGPCGELIAELLQ
r2b8         107 LRYYPSLNKMFGQFSDLWLQLCREVVSNKHLMAKLKESQFDVVLSDAVGPCGELIAEILQ
r2b34        109 WGYFLMFQELVWVDSDYFESLCKDVVFNKELMTKLQNSGFDVILADPFIPCGDLLAEILK
r2b39        107 WGYFLMLQKLFERTSDYSERLCRDAAFNKELMTKLQNSGFDVILADPFTPCGDLLAEILK
r2b1         107 WTYYSKMQKVFNEYSDVVENLCKALIWNKSLMKKLQGSQFDVILADAVGPCGELLAEILK
r2a3         106 WEAARTLQDFFLQLTGNFEDLCRSTLYNQTLMNKLRDAKYDVMVLDPVIPCGELVAEVLQ

Ugt71g1      136 IPSYLFLTNSVGFSLMLSLK.NRQIEEVFDDSDRDHQLLNIPGISNQVPSNVLPDACFN
r2a1         165 IPFIYSLRFSPASTVEKHCGKVPFPPSYVPAILSELTDQMSFADRVRNFISYRMQDYMFE
r2b3         167 IPFLYSLRFSPGKIEKSSGRFILPPSYVPVILSGMGGPMTFIDRVKNMICTLYFDFWFH
r2b6         167 IPFLYSLRASPGHKIEKSSGRFILPPSYVPVILSGLGGQMTFIDRVKNMICMLYFDFWFH
r2b2         167 IPFLYSLFSPGHKLEKSIGKFILPPSYVPVILSGLAGQMTFIDRVKNMICMLYFDFWFE
r2b12        167 IPFLYSLRFSPGYTIEKYIGGVLFPPSYVPMIFSGLAGQMTFIERVHNMICMLYFDFWFQ
r2b8         167 LPFVYSLRFGIGYGIEKYSAGQFPPSYVPIILSGLSGQMTFMERVENMLLLYFDFWFE
r2b34        169 IPLVYSLRFFPGSTYEKYSGLPMPPSYVPIAMSELSDRMTFVERMKHMIYVLCFDFWFQ
r2b39        167 IPLVYSLRFFPGSTYEKYSGLPMPPSYVPIAMSELSDRMTFVERVKHMIYVLCFDFWFQ
r2b1         167 TPLVYSLRFCPGYRCEKFSGGLPLPPSYVPVLSELSDRMTFVERVKNMLQMLYFDFWFQ
r2a3         166 IPFVNTLRFSMGYSMEKYCGLPVPLSYVPVVMGELTDHMTFTERVKNMMLSLFFEFWLQ

Ugt71g1      195 KD.GGYIAYYKLAERFRDTKGIIVNTFSDLEQSSIDALYDHDEK.IPIYAVGPLLDLKGQPNPK
r2a1         225 TL.WKQWDSYYSKALGRPTTLCETMGKAEIWLMRTYWDFEFPRPYLPNFEFVGGLHCKPAKPLPK
r2b3         227 MFNAKKWDPFYSEILGRPTTLAETMGKAEMWLIRSYWDLEFPHPTLPNVDIGGLQCRPPKPLPK
r2b6         227 MFNAKNWDPFYTEILGRPTTLAETMGKAEMWLIRSYWDLEFPHPTLPNVDIGGLQCKPAKPLPK
r2b2         227 ILRHKEWDTFYSEILGRPTTVDETMSKVEIWLIRSYWDLKFPHPTLPNVDIGGLHCKPAKPLPK
r2b12        227 TFREKKWDPFYSKTLGRPTTLAEIMGKAEMWLIRSYWDLEFPHPISPNVDYIGGLHCKPAKPLPK
r2b8         227 SFPAKDWDPFFSEILGRPTTMVDTMKKAEIWLIRSYWDLEFPRPSLPNIEFVGGLHCQPAKPLPK
r2b34        229 AFNEKKWNELYTEVLGRPTTLSETMAKADIWLIRTYWDLEFPHPVLPNFDFVGGLHCRPAKPLPK
r2b39        227 VFDEKKWNELYTEVLGRPTTLSETMAKADIWLIRTYWDLEFPHPVLPNFDFVGGLHCRPAKPLPK
r2b1         227 PFKEKSWSQFYSDVLGRPTTLTEMMGKADIWLIRTFWDLEFPHPFLPNFDFVGGLHCRPAKPLPK
r2a3         226 QYDFAFWDQFYSKTLGRPTTFCKTVGKAEIWLIRTYWDIEFPRPYLPNFEFVGGLHCRPAKPLPK

```
